# Supplementary material for: Remarkable effect of alkynyl substituents on the fluorescence properties of a BN-phenanthrene
Source: publisher site journal article supplement (doi:10.3762/bjoc.15.122), 2019-06-06

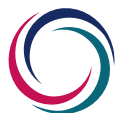

## Supporting Information

for

### **Remarkable effect of alkynyl substituents on the fluorescence properties of a BN-phenanthrene**

Alberto Abengózar, David Sucunza, Patricia García-García and Juan J. Vaquero

*Beilstein J. Org. Chem.* **2019**, *15*, 1257–1261. [doi:10.3762/bjoc.15.122](https://doi.org/10.3762/bjoc.15.122)

### **Experimental details and NMR spectra for all new compounds**

## Table of contents

|                                                                                                                                                       |     |
|-------------------------------------------------------------------------------------------------------------------------------------------------------|-----|
| General experimental details -----                                                                                                                    | S2  |
| Experimental procedures and data -----                                                                                                                | S3  |
| Synthesis of 7-chloro-4a-aza-10a-boraphenanthrene ( <b>1b</b> ) -----                                                                                 | S3  |
| Palladium-catalyzed cross coupling reactions of 7-chloro-4a-aza-10a-boraphenanthrene ( <b>1b</b> )-----                                               | S6  |
| UV-vis and fluorescence data for <b>1f</b> in different solvents-----                                                                                 | S11 |
| Copies of $^1\text{H}$ , $^{13}\text{C}$ and $^{11}\text{B}$ NMR spectra for novel compounds and selected gCOSY, TOCSY, gHSQC and gHMBC spectra ----- | S12 |

## GENERAL EXPERIMENTAL DETAILS

Reagents were acquired from commercial sources and were used without further purification. Dry solvents, where necessary, were dried using an MBRAUN MB-SPS-800 apparatus. In general, reactions were carried out under an argon atmosphere using oven-dried glassware with magnetic stirring and dry solvents. Reactions were monitored by using analytical TLC plates (Merck; silica gel 60 F254, 0.25 mm), and compounds were visualized with UV radiation. Silica gel grade 60 (70-230 mesh, Merck) was used for column chromatography. All melting points were determined in open capillary tubes using a Stuart Scientific SMP3 melting point apparatus. IR spectra were obtained using a Perkin–Elmer FTIR spectrum 2000 spectrophotometer.  $^1\text{H}$ ,  $^{13}\text{C}$  and  $^{11}\text{B}$  NMR spectra were recorded using either a Varian Mercury VX-300, Varian Unity 300 or Varian Unity 500 MHz spectrometer at room temperature. Chemical shifts are given in ppm ( $\delta$ ) downfield from TMS, with calibration on the residual protio-solvent used ( $\delta_{\text{H}} = 7.24$  ppm and  $\delta_{\text{C}} = 77.0$  ppm for  $\text{CDCl}_3$ ). Coupling constants ( $J$ ) are in Hertz (Hz) and signals are described as follows: s, singlet; d, doublet; t, triplet; q, quadruplet; m, multiplet; b, broad; ap, apparent. High-resolution analysis (HRMS) were performed using an Agilent 6210 time of-flight LC/MS. Elemental analysis was performed using a LECO CHNSO-932 instrument.

Absorption spectra were recorded using a UV–vis Uvikon 941 (Kontron Instruments) spectrophotometer. Steady-state fluorescence measurements were carried out using a PTI Quanta Master spectrofluorimeter equipped with a Xenon flash lamp as light source, single concave grating monochromators and Glan-Thompson polarizers in the excitation and emission paths. Detection was allowed by a photomultiplier cooled by a Peltier system. Slit widths were selected at 6 nm for both excitation and emission paths and polarizers were fixed at the “magic angle” condition. Right angle geometry and rectangular 10 mm path cells were used for the fluorescence measurements. Fluorescence quantum yields were determined using as the standard 9,10-diphenylanthracene in solution of cyclohexane<sup>1</sup>

The starting material 1-bromo-4-chloro-2-vinylbenzene was prepared according to published procedures.<sup>2</sup>

---

<sup>1</sup> (a) A. M. Brouwer, *Pure Appl. Chem.*, **2011**, *83*, 2213; (b) F. Mendicuti, W. L. Mattice, *Polym. Bull.*, **1989**, *22*, 557.

<sup>2</sup> A. Abengózar, P. García-García, D. Sucunza, A. Pérez-Redondo, J. J. Vaquero, *Chem. Commun.*, **2018**, *54*, 2467.

## EXPERIMENTAL PROCEDURES AND DATA

### Synthesis of 7-chloro-4a-aza-10a-boraphenanthrene (1b)

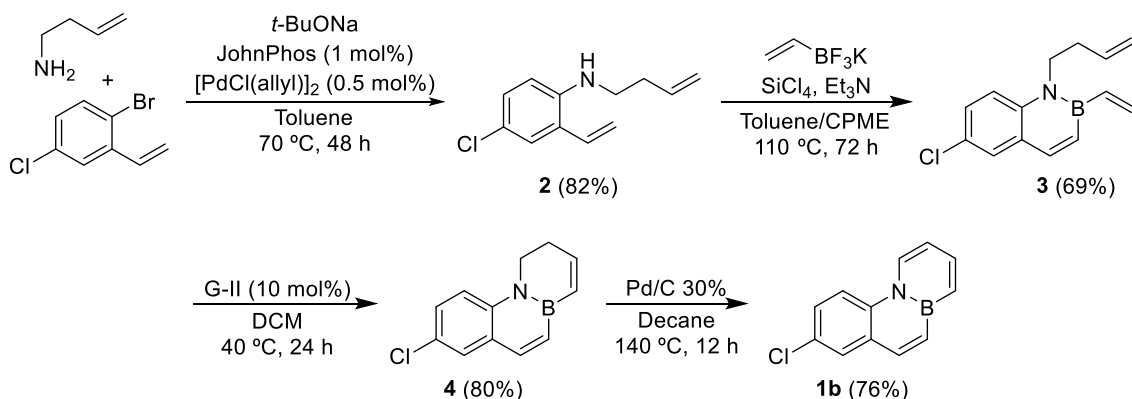

### Preparation of *N*-(but-3-en-1-yl)-4-chloro-2-vinylaniline (**2**).

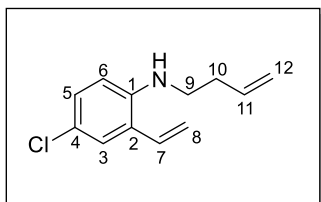

[PdCl(allyl)]<sub>2</sub> (6.0 mg, 0.017 mmol, 0.5 mol %), JohnPhos (10 mg, 0.035 mmol, 1.0 mol%), and *t*-BuONa (481 mg, 4.86 mmol, 1.4 equiv) were added to an oven-dried vial equipped with a stir bar. The vial was sealed with a cap lined with a disposable Teflon septum, evacuated under vacuum, and purged with argon three times. Toluene (6 mL) was then added, followed by 1-bromo-4-chloro-2-vinylbenzene (755 mg, 3.47 mmol, 1.0 equiv) and 3-butenylamine (410  $\mu\text{L}$ , 4.17 mmol, 1.2 equiv). The reaction mixture was heated to 70  $^\circ\text{C}$  for 48 h, then the crude mixture was cooled to room temperature, diluted with Et<sub>2</sub>O (10 mL) and filtered through a pad of Celite®. The solvent was removed under reduced pressure and the remaining oil was purified by flash column chromatography (1% EtOAc/Hexane) to give **2** (588 mg, 2.83 mmol, 82%) as a yellow oil.

**IR (NaCl)**  $\tilde{\nu}_{\text{max}}$  (cm<sup>-1</sup>) 3423 (NH), 3081, 2922, 2850, 1597, 1500, 1419, 1319, 993, 917, 805.

**<sup>1</sup>H-NMR (300 MHz, CDCl<sub>3</sub>)**  $\delta$  (ppm) 7.20 (d, *J* = 2.5 Hz, 1H, H-3), 7.10 (dd, *J* = 8.7, 2.5 Hz, 1H, H-5), 6.63 (dd, *J*<sub>trans</sub> = 17.3 Hz, *J*<sub>cis</sub> = 11.0 Hz, 1H, H-7), 6.54 (d, *J* = 8.7 Hz, 1H, H-6), 5.82 (ddt, *J*<sub>trans</sub> = 17.1 Hz, *J*<sub>cis</sub> = 10.2 Hz, *J* = 6.7 Hz, 1H, H-11), 5.59 (dd, *J*<sub>trans</sub> = 17.3 Hz, *J*<sub>gem</sub> = 1.4 Hz, 1H, H-8), 5.33 (dd, *J*<sub>cis</sub> = 11.0 Hz, *J*<sub>gem</sub> = 1.4 Hz, 1H, H-8), 5.16 (ap dq, *J*<sub>trans</sub> = 17.1 Hz, *J* = 1.4 Hz, 1H, H-12), 5.14–5.10 (m, 1H, H-12), 3.85 (br s, 1H, NH), 3.16 (t, *J* = 6.7 Hz, 2H, H-9), 2.40 (ap qt, *J* = 6.7, 1.4 Hz, 2H, H-10).

**<sup>13</sup>C-NMR (75 MHz, CDCl<sub>3</sub>)**  $\delta$  (ppm) 143.7 (C-1), 135.5 (C-11), 131.6 (C-7), 128.4 (C-5), 127.0 (C-3), 125.6 (C-4), 121.9 (C-2), 117.4 (C-6), 117.3 (C-12), 111.9 (C-8), 42.8 (C-9), 33.4 (C-10).

**HRMS (APCI)** *m/z* calculated for C<sub>12</sub>H<sub>15</sub>ClN [M+H]<sup>+</sup>: 208.0888; found [M+H]<sup>+</sup>: 208.0886.

### Preparation of 1-(but-3-en-1-yl)-6-chloro-2-vinyl-1-aza-2-boranaphthalene (**3**).

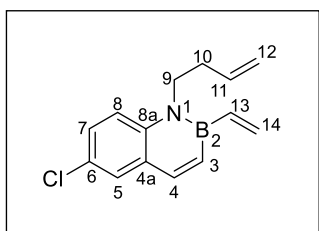

Potassium vinyltrifluoroborate (328 mg, 2.33 mmol, 1.0 equiv) was added to an oven-dried vial equipped with a stir bar. The vial was sealed with a cap lined with a disposable Teflon septum, evacuated under vacuum, and purged with argon three times. CMPE (5 mL) and toluene (5 mL) were then added, followed by amine **2** (580 mg, 2.79 mmol, 1.2 equiv), SiCl<sub>4</sub> (270  $\mu$ L, 2.33 mmol, 1.0 equiv) and Et<sub>3</sub>N (487  $\mu$ L, 3.50 mmol, 1.5 equiv) under argon. The reaction mixture was heated to 110 °C for 72 h, then the crude mixture was cooled to room temperature, diluted with Et<sub>2</sub>O (10 mL) and filtered through a pad of silica gel. The solvent was removed under reduced pressure and the remaining residue was purified by flash column chromatography (hexane) to give **3** (394 mg, 1.62 mmol, 69%) as a light-yellow oil.

**IR (NaCl)**  $\tilde{\nu}_{\text{max}}$  (cm<sup>-1</sup>) 3061, 2924, 2853, 1605, 1544, 1477, 1415, 1387, 1283, 1209, 1001, 952, 918, 884, 799.

**<sup>1</sup>H-NMR (500 MHz, CDCl<sub>3</sub>)**  $\delta$  (ppm) 7.83 (d,  $J$  = 11.5 Hz, 1H, H-4), 7.58 (d,  $J$  = 2.1 Hz, 1H, H-5), 7.44 (d,  $J$  = 9.1 Hz, 1H, H-8), 7.40 (dd,  $J$  = 9.1, 2.1 Hz, 1H, H-7), 7.06 (d,  $J$  = 11.5 Hz, 1H, H-3), 6.69 (dd,  $J_{\text{trans}}$  = 19.4 Hz,  $J_{\text{cis}}$  = 13.5 Hz, 1H, H-13), 6.22 (dd,  $J_{\text{trans}}$  = 19.4 Hz,  $J_{\text{gem}}$  = 3.7 Hz, 1H, H-14), 6.09 (dd,  $J_{\text{cis}}$  = 13.5 Hz,  $J_{\text{gem}}$  = 3.7 Hz, 1H, H-14), 5.87 (ddt,  $J_{\text{trans}}$  = 17.1 Hz,  $J_{\text{cis}}$  = 10.2 Hz,  $J$  = 6.8 Hz, 1H, H-11), 5.11 (ap dq,  $J_{\text{trans}}$  = 17.1 Hz,  $J$  = 1.6 Hz, 1H, H-12), 5.11–5.06 (m, 1H, H-12), 4.20–4.14 (m, 2H, H-9), 2.49 (ap qt,  $J$  = 6.8, 1.6 Hz, 2H, H-10).

**<sup>13</sup>C-NMR (125 MHz, CDCl<sub>3</sub>)**  $\delta$  (ppm) 143.4 (C-4), 139.4 (C-8a), 137.6 (C-13\*), 134.6 (C-11), 133.8 (C-14), 129.8 (C-3\*), 129.3 (C-5), 128.3 (C-7), 128.2 (C-4a), 125.7 (C-6), 117.0 (C-12), 116.2 (C-8), 46.3 (C-9), 34.2 (C-10). \*Carbon not observed in <sup>13</sup>C-NMR, assigned by gHSQC.

**<sup>11</sup>B-NMR (160 MHz, CDCl<sub>3</sub>)**  $\delta$  (ppm) 33.83.

**HRMS (EI)**  $m/z$  calculated for C<sub>14</sub>H<sub>15</sub>BClN [M]<sup>+</sup>: 243.0981; found [M]<sup>+</sup>: 243.0981.

### Preparation of 7-chloro-3,4-dihydro-4a-aza-10a-boraphenanthrene (**4**).

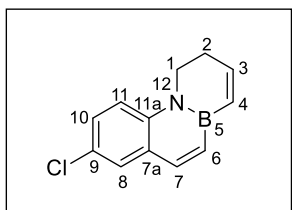

Grubbs' second-generation ruthenium catalyst (136 mg, 0.160 mmol, 10 mol %) in dichloromethane (3 mL) was added to a solution of diene **3** (390 mg, 1.60 mmol, 1.0 equiv) in dichloromethane (16 mL) under argon and the reaction mixture was heated to reflux for 24 h. The crude mixture was then cooled to room temperature,

diluted with dichloromethane (20 mL) and filtered through a pad of silica gel. The solvent was removed under reduced pressure and the remaining residue was purified by flash column chromatography (hexane) to give **4** (277 mg, 1.29 mmol, 80%) as a colourless oil.

**IR (NaCl)**  $\tilde{\nu}_{\max}$  (cm<sup>-1</sup>) 3010, 2927, 1606, 1587, 1542, 1392, 1316, 1203, 1171, 882, 801.

**<sup>1</sup>H-NMR (500 MHz, CDCl<sub>3</sub>)**  $\delta$  (ppm) 7.83 (d,  $J$  = 11.3 Hz, 1H, H-7), 7.56 (d,  $J$  = 2.5 Hz, 1H, H-8), 7.47 (d,  $J$  = 9.1 Hz, 1H, H-11), 7.40 (dd,  $J$  = 9.1, 2.5 Hz, 1H, H-10), 6.85 (d,  $J$  = 11.3 Hz, 1H, H-6), 6.76 (dt,  $J$  = 11.7, 4.1 Hz, 1H, H-3), 6.30 (dt,  $J$  = 11.7, 1.6 Hz, 1H, H-4), 3.98 (t,  $J$  = 7.3 Hz, 2H, H-1), 2.56 (tdd,  $J$  = 7.3, 4.1, 1.6 Hz, 2H, H-2).

**<sup>13</sup>C-NMR (125 MHz, CDCl<sub>3</sub>)**  $\delta$  (ppm) 144.0 (C-7), 142.7 (C-3), 140.3 (C-11a), 130.3 (C-6\*), 129.4 (C-4\*), 129.2 (C-8), 128.2 (C-10), 127.9 (C-7a), 125.1 (C-9), 114.9 (C-11), 42.4 (C-1), 28.2 (C-2).

\*Carbon not observed in <sup>13</sup>C-NMR, assigned by gHSQC.

**<sup>11</sup>B-NMR (160 MHz, CDCl<sub>3</sub>)**  $\delta$  (ppm) 30.93.

**MS (DIP-IE)**  $m/z$  (relative intensity, %): 215 (M<sup>+</sup>, 100).

**Elemental analysis** calculated for C<sub>12</sub>H<sub>11</sub>BClN (215.49 g/mol): C, 66.89; H, 5.15; N, 6.50.

Found: C, 67.28; H, 5.13; N, 6.35.

#### Preparation of 7-chloro-4a-aza-10a-boraphenanthrene (**1b**).

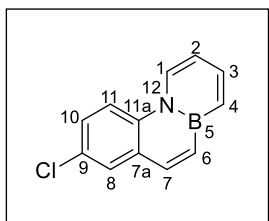

Pd/C 30% (100 mg, 40% w/w) was added to a solution of BN-phenanthrene derivative **4** (250 mg, 1.16 mmol, 1.0 equiv.) in decane (14 mL) and the reaction mixture heated to 140 °C for 12 h. The crude mixture was then cooled to room temperature, diluted with dichloromethane (10 mL) and filtered through a pad of Celite®. The

solvent was removed under reduced pressure and the remaining residue was purified by flash column chromatography (Hexane) to give **1b** (187 mg, 0.876 mmol, 76%) as a light-yellow oil.

**IR (NaCl)**  $\tilde{\nu}_{\max}$  (cm<sup>-1</sup>) 3014, 2926, 2861, 1616, 1595, 1468, 1395, 1276, 881, 791, 729.

**<sup>1</sup>H-NMR (500 MHz, CDCl<sub>3</sub>)**  $\delta$  (ppm) 8.56 (d,  $J$  = 7.5 Hz, 1H, H-1), 8.10 (d,  $J$  = 9.2 Hz, 1H, H-11), 7.86 (d,  $J$  = 11.5 Hz, 1H, H-7), 7.77 (dd,  $J$  = 10.9, 6.2 Hz, 1H, H-3), 7.74 (d,  $J$  = 2.5 Hz, 1H, H-8), 7.52 (dd,  $J$  = 9.2, 2.5 Hz, 1H, H-10), 7.38 (dd,  $J$  = 10.9, 1.9 Hz, 1H, H-4), 7.36 (d,  $J$  = 11.5 Hz, 1H, H-6), 6.78 (ddd,  $J$  = 7.5, 6.2, 1.9 Hz, 1H, H-2).

**<sup>13</sup>C-NMR (125 MHz, CDCl<sub>3</sub>)** δ (ppm) 140.5 (C-3), 139.6 (C-7), 136.2 (C-11a), 132.2 (C-6\*), 132.0 (C-4\*), 129.8 (C-8), 129.4 (C-7a), 129.0 (C-9), 128.0 (C-1), 127.9 (C-10), 116.1 (C-11), 114.2 (C-2).

\*Carbon not observed in <sup>13</sup>C-NMR, assigned by gHSQC.

**<sup>11</sup>B-NMR (160 MHz, CDCl<sub>3</sub>)** δ (ppm) 28.86.

**HRMS (EI)** *m/z* calculated for C<sub>12</sub>H<sub>9</sub>BClN [M]<sup>+</sup>: 213.0511; found [M]<sup>+</sup>: 213.0516.

### Palladium-Catalyzed cross coupling reactions of 7-chloro-4a-aza-10a-boraphenanthrene (**1b**)

#### *Suzuki and Buchwald-Hartwig Reactions*

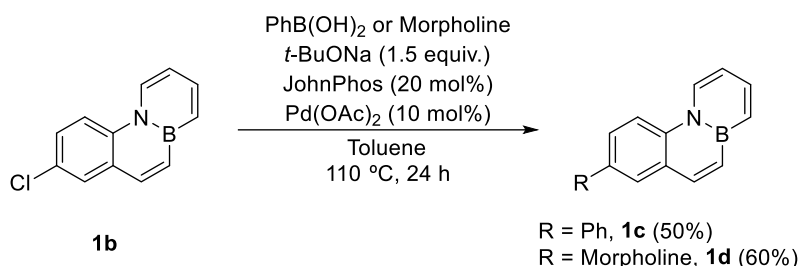

#### Preparation of 7-phenyl-4a-aza-10a-boraphenanthrene (**1c**).

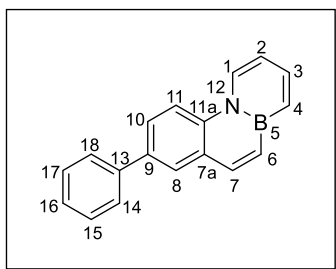

Pd(OAc)<sub>2</sub> (4.3 mg, 0.019 mmol, 10 mol%), JohnPhos (12 mg, 0.038 mmol, 20 mol%), *t*-BuONa (28 mg, 0.29 mmol, 1.5 equiv), phenylboronic acid (49 mg, 0.38 mmol, 2.0 equiv.) and BN-phenanthrene **1b** (40 mg, 0.19 mmol, 1.0 equiv.) were added to an oven-dried vial equipped with a stir bar. The vial was sealed with a cap lined with a disposable Teflon septum, evacuated

and purged with argon three times. Toluene (2 mL) was then added and the reaction mixture heated to 110 °C for 24 h. The crude mixture was subsequently cooled to room temperature, and diluted with CH<sub>2</sub>Cl<sub>2</sub> (10 mL) and water (10 mL). The layers were then separated and the aqueous layer extracted with CH<sub>2</sub>Cl<sub>2</sub> (2 x 10 mL). The combined organic layers were dried over anhydrous Na<sub>2</sub>SO<sub>4</sub>, filtered and concentrated under reduced pressure. The remaining residue was purified by flash column chromatography (Hexane) to give **1c** (24 mg, 0.095 mmol, 50%) as a white solid.

**M. p.:** 124–126 °C.

**IR (KBr)**  $\tilde{\nu}_{\text{max}}$  (cm<sup>-1</sup>) 3025, 1614, 1594, 1518, 1455, 1394, 1265, 895, 801, 765, 734.

**<sup>1</sup>H-NMR (500 MHz, CDCl<sub>3</sub>)** δ (ppm) 8.69 (d, *J* = 7.4 Hz, 1H, H-1), 8.27 (d, *J* = 8.9 Hz, 1H, H-11), 8.04 (d, *J* = 11.4 Hz, 1H, H-7), 8.00 (d, *J* = 2.3 Hz, 1H, H-8), 7.84 (dd, *J* = 8.9, 2.3 Hz, 1H, H-10), 7.78

(ddd,  $J = 11.0, 6.3, 0.8$  Hz, 1H, H-3), 7.72–7.70 (m, 2H, H-14, H-18), 7.50–7.47 (m, 2H, H-15, H-17), 7.41–7.36 (m, 2H, H-4, H-16), 7.36 (d,  $J = 11.4$  Hz, 1H, H-6), 6.80 (ddd,  $J = 7.4, 6.3, 1.7$  Hz, 1H, H-2).

**$^{13}\text{C}$ -NMR (125 MHz,  $\text{CDCl}_3$ )**  $\delta$  (ppm) 140.9 (C-7), 140.3 (C-3), 140.2 (C-13), 137.1 (C-11a), 136.4 (C-9), 132.0 (C-4\*), 131.5 (C-6\*), 129.0 (C-8), 128.9 (2C, C-15, C-17), 128.5 (C-7a), 128.2 (C-1), 127.3 (C-16), 127.1 (2C, C-14, C-18), 126.8 (C-10), 115.1 (C-11), 113.9 (C-2). \*Carbon not observed in  $^{13}\text{C}$ -NMR, assigned by gHSQC.

**$^{11}\text{B}$ -NMR (160 MHz,  $\text{CDCl}_3$ )**  $\delta$  (ppm) 28.82.

**HRMS (EI)**  $m/z$  calculated for  $\text{C}_{18}\text{H}_{14}\text{BN}$   $[\text{M}]^+$ : 255.1214; found  $[\text{M}]^+$ : 255.1218.

#### Preparation of 7-morpholino-4a-aza-10a-boraphenanthrene (**1d**).

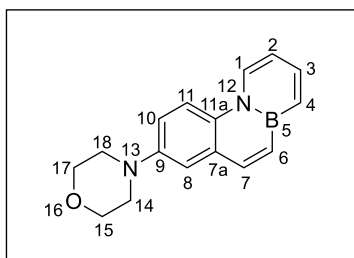

$\text{Pd}(\text{OAc})_2$  (4.3 mg, 0.019 mmol, 10 mol%), JohnPhos (12 mg, 0.038 mmol, 20 mol%), *t*-BuONa (28 mg, 0.29 mmol, 1.5 equiv) and BN-phenanthrene **1b** (40 mg, 0.19 mmol, 1.0 equiv) were added to an oven-dried vial equipped with a stir bar. The vial

was sealed with a cap lined with a disposable Teflon septum, evacuated under vacuum, and purged with argon three times. Toluene (2 mL) was then added, followed by morpholine (34  $\mu\text{L}$ , 0.38 mmol, 2.0 equiv), and the reaction mixture was heated to 110  $^\circ\text{C}$  for 24 h. The crude mixture was subsequently cooled to room temperature, and diluted with  $\text{CH}_2\text{Cl}_2$  (10 mL) and water (10 mL). The layers were separated, and the aqueous layer was extracted with  $\text{CH}_2\text{Cl}_2$  (2 x 10 mL). The combined organic layers were dried over anhydrous  $\text{Na}_2\text{SO}_4$ , filtered and concentrated under reduced pressure. The remaining residue was purified by flash column chromatography (20% EtOAc/hexane) to give **1d** (30 mg, 0.11 mmol, 60%) as a white solid.

**M. p.:** 124–126  $^\circ\text{C}$ .

**IR (KBr)**  $\tilde{\nu}_{\text{max}}$  ( $\text{cm}^{-1}$ ) 2958, 2852, 1612, 1558, 1516, 1451, 1266, 1123, 973, 792.

**$^1\text{H}$ -NMR (500 MHz,  $\text{CDCl}_3$ )**  $\delta$  (ppm) 8.61 (d,  $J = 7.4$  Hz, 1H, H-1), 8.10 (d,  $J = 9.3$  Hz, 1H, H-11), 7.89 (d,  $J = 11.4$  Hz, 1H, H-7), 7.74 (ddd,  $J = 10.9, 6.3, 0.7$  Hz, 1H, H-3), 7.36 (dd,  $J = 10.9, 1.6$  Hz, 1H, H-4), 7.30 (d,  $J = 11.4$  Hz, 1H, H-6), 7.23 (dd,  $J = 9.3, 2.9$  Hz, 1H, H-10), 7.19 (d,  $J = 2.9$  Hz, 1H, H-8), 6.75 (ddd,  $J = 7.4, 6.3, 1.6$  Hz, 1H, H-2), 3.92–3.90 (m, 4H, H-15, H-17), 3.24–3.22 (m, 4H, H-14, H-18).



**<sup>13</sup>C-NMR (125 MHz, CDCl<sub>3</sub>)** δ (ppm) 147.4 (C-9), 140.6 (C-7), 139.8 (C-3), 131.9 (C-11a), 131.6 (C-4\*), 131.5 (C-6\*), 129.0 (C-7a), 128.2 (C-1), 117.6 (C-10), 115.6 (C-8), 115.5 (C-11), 113.5 (C-2), 66.9 (2C, C-15, C-17), 49.8 (2C, C-14, C-18). \*Carbon not observed in <sup>13</sup>C-NMR, assigned by gHSQC.

**<sup>11</sup>B-NMR (160 MHz, CDCl<sub>3</sub>)** δ (ppm) 28.51.

**HRMS (EI)** *m/z* calculated for C<sub>16</sub>H<sub>17</sub>BN<sub>2</sub>O [M]<sup>+</sup>: 264.1428; found [M]<sup>+</sup>: 264.1428.

### Sonogashira Reaction

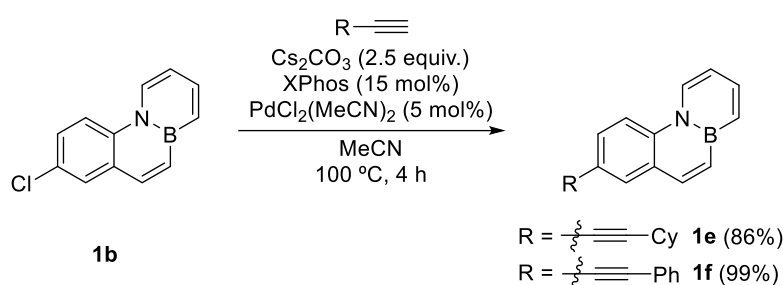

**General procedure for the Sonogashira reaction:** PdCl<sub>2</sub>(MeCN)<sub>2</sub> (5 mol %), XPhos (15 mol %), Cs<sub>2</sub>CO<sub>3</sub> (2.5 equiv) and BN-phenanthrene **1b** (1.0 equiv) were added to an oven-dried vial equipped with a stir bar. The vial was sealed with a cap lined with a disposable Teflon septum, evacuated under vacuum, and purged with argon three times. Acetonitrile (0.1 M) was then added and the resulting suspension stirred at room temperature for 30 min. The corresponding alkyne (1.3 equiv) was then injected, and the reaction mixture was heated to 100 °C until full consumption of starting material was observed by TLC. The crude mixture was cooled to room temperature and diluted with CH<sub>2</sub>Cl<sub>2</sub> and water. The layers were separated, and the aqueous layer was extracted twice with CH<sub>2</sub>Cl<sub>2</sub>. The combined organic layers were dried over anhydrous Na<sub>2</sub>SO<sub>4</sub>, filtered and concentrated under reduced pressure. The remaining residue was purified by flash column chromatography to give the corresponding alkyne products.

### Preparation of 7-(cyclohex-1-en-1-ylethynyl)-4a-aza-10a-boraphenanthrene (**1e**).

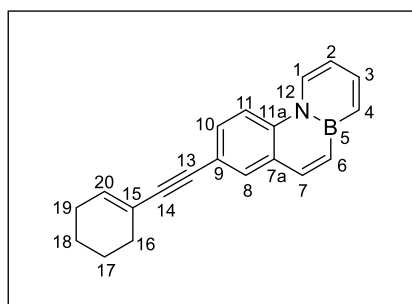

Following the general procedure, PdCl<sub>2</sub>(MeCN)<sub>2</sub> (2.5 mg, 0.0095 mmol), XPhos (14 mg, 0.029 mmol), Cs<sub>2</sub>CO<sub>3</sub> (156 mg, 0.479 mmol) and BN-phenanthrene **1b** (40 mg, 0.19 mmol) were dissolved in acetonitrile (2 mL). Then, 1-ethynylcyclohexene (29 μL, 0.24 mmol) was injected, and the mixture was heated to 100 °C for 4 h. Purification by

flash column chromatography (1% EtOAc/hexane) gave **1e** (46 mg, 0.16 mmol, 86%) as a brown solid.

**M. p.:** 75–77 °C.

**IR (KBr)**  $\tilde{\nu}_{\max}$  (cm<sup>-1</sup>) 3027, 2929, 2857, 1618, 1555, 1515, 1470, 1396, 1302, 1265, 796, 731.

**<sup>1</sup>H-NMR (500 MHz, CDCl<sub>3</sub>)**  $\delta$  (ppm) 8.59 (d, *J* = 7.4 Hz, 1H, H-1), 8.12 (d, *J* = 8.9 Hz, 1H, H-11), 7.90 (d, *J* = 11.4 Hz, 1H, H-7), 7.86 (d, *J* = 2.0 Hz, 1H, H-8), 7.75 (dd, *J* = 11.0, 6.2 Hz, 1H, H-3), 7.62 (dd, *J* = 8.9, 2.0 Hz, 1H, H-10), 7.37 (dd, *J* = 11.0, 1.5 Hz, 1H, H-4), 7.32 (d, *J* = 11.4 Hz, 1H, H-6), 6.77 (ddd, *J* = 7.4, 6.2, 1.5 Hz, 1H, H-2), 6.27–6.24 (m, 1H, H-20), 2.29–2.25 (m, 2H, H-16), 2.18–2.14 (m, 2H, H-19), 1.72–1.67 (m, 2H, H-17), 1.65–1.60 (m, 2H, H-18).

**<sup>13</sup>C-NMR (125 MHz, CDCl<sub>3</sub>)**  $\delta$  (ppm) 140.4 (C-3), 140.3 (C-7), 137.1 (C-11a), 135.4 (C-20), 133.8 (C-8), 131.7 (C-4\*), 131.3 (C-6\*), 130.8 (C-10), 128.1 (C-7a), 128.0 (C-1), 120.7 (C-15), 119.1 (C-9), 114.7 (C-11), 114.0 (C-2), 91.5 (C-14), 86.2 (C-13), 29.3 (C-16), 25.8 (C-19), 22.4 (C-17), 21.5 (C-18). \*Carbon not observed in <sup>13</sup>C-NMR, assigned by gHSQC.

**<sup>11</sup>B-NMR (160 MHz, CDCl<sub>3</sub>)**  $\delta$  (ppm) 29.01.

**HRMS (EI)** *m/z* calculated for C<sub>20</sub>H<sub>18</sub>BN [M]<sup>+</sup>: 283.1527; found [M]<sup>+</sup>: 283.1526.

#### Preparation of 7-(phenylethynyl)-4a-aza-10a-boraphenanthrene (**1f**).

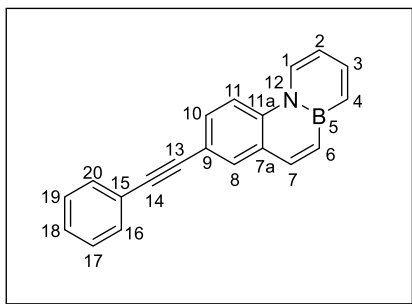

Following the general procedure, PdCl<sub>2</sub>(MeCN)<sub>2</sub> (1.8 mg, 0.0070 mmol), XPhos (10 mg, 0.021 mmol), Cs<sub>2</sub>CO<sub>3</sub> (115 mg, 0.353 mmol) and BN-phenanthrene **1b** (30 mg, 0.14 mmol) were dissolved in acetonitrile (1.5 mL). Then, phenylacetylene (20  $\mu$ L, 0.18 mmol) was injected, and the mixture was heated to 100 °C for 4 h. Purification by flash column chromatography (5% CH<sub>2</sub>Cl<sub>2</sub>/hexane) gave **1f** (39 mg, 0.14 mmol, 99%) as a white solid.

**M. p.:** 97–99 °C.

**IR (KBr)**  $\tilde{\nu}_{\max}$  (cm<sup>-1</sup>) 3027, 1617, 1554, 1452, 1441, 898, 806, 758, 733, 692.

**<sup>1</sup>H-NMR (500 MHz, CDCl<sub>3</sub>)**  $\delta$  (ppm) 8.62 (d, *J* = 7.5 Hz, 1H, H-1), 8.18 (d, *J* = 8.9 Hz, 1H, H-11), 7.98 (d, *J* = 2.1 Hz, 1H, H-8), 7.94 (d, *J* = 11.4 Hz, 1H, H-7), 7.77 (dd, *J* = 11.0, 6.3 Hz, 1H, H-3), 7.74 (dd, *J* = 8.9, 2.1 Hz, 1H, H-10), 7.58–7.55 (m, 2H, H-16, H-20), 7.40–7.34 (m, 5H, H-4, H-6, H-17, H-18, H-19), 6.79 (ddd, *J* = 7.5, 6.3, 1.7 Hz, 1H, H-2).

**<sup>13</sup>C-NMR (125 MHz, CDCl<sub>3</sub>)** δ (ppm) 140.5 (C-3), 140.3 (C-7), 137.5 (C-11a), 134.1 (C-8), 132.1 (C-4\*), 131.61 (2C, C-16, C-20), 131.60 (C-6\*), 130.9 (C-10), 128.4 (2C, C-17, C-19), 128.3 (C-18), 128.1 (C-7a), 128.0 (C-1), 123.2 (C-15), 118.5 (C-9), 114.9 (C-11), 114.2 (C-2), 89.7 (C-14), 88.9 (C-13). \*Carbon not observed in <sup>13</sup>C-NMR, assigned by gHSQC.

**<sup>11</sup>B-NMR (160 MHz, CDCl<sub>3</sub>)** δ (ppm) 29.17.

**HRMS (EI)** *m/z* calculated for C<sub>20</sub>H<sub>14</sub>BN [M]<sup>+</sup>: 279.1214; found [M]<sup>+</sup>: 279.1219.

## UV–VIS AND FLUORESCENCE DATA FOR **1f** IN DIFFERENT SOLVENTS

| Solvent               | UV/Vis $\lambda_{\text{max}}$ (nm) | Emission <sup>a</sup> $\lambda_{\text{max}}$ (nm) | $\Phi_F^b$ (%) |
|-----------------------|------------------------------------|---------------------------------------------------|----------------|
| Cyclohexane (CH)      | 278, 292, 311, 323, 336, 345       | 348, 364                                          | 0.65           |
| Dichloromethane (DCM) | 280, 293, 313, 324, 337            | 352, 366                                          | 0.29           |
| Tetrahydrofuran (THF) | 278, 293, 312, 324, 336            | 350, 365                                          | 0.19           |
| 1,4-Dioxane           | 279, 292, 313, 324, 336            | 350, 365                                          | 0.39           |
| Acetonitrile (MeCN)   | 280, 291, 312, 322, 334            | 351, 365                                          | 0.26           |

<sup>a</sup>Emission at 323 nm. <sup>b</sup>Quantum yield relative to 9,10-diphenylanthracene ( $\Phi_F = 0.93$ ) at room temperature. All measures were realized with 7-(phenylethynyl)-4a-aza-10a-boraphenanthrene (**1f**) as substrate at a concentration of  $10^{-5}$  M.

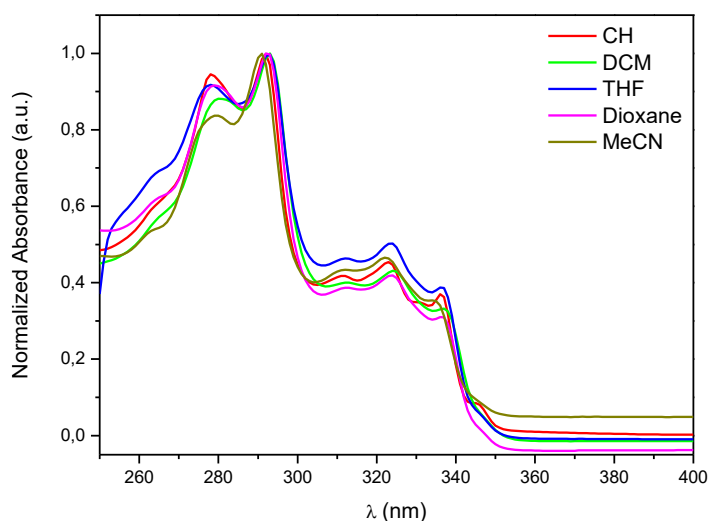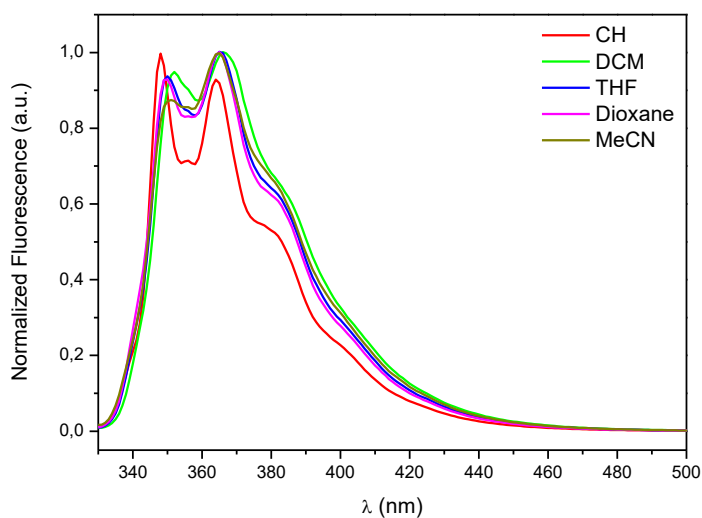

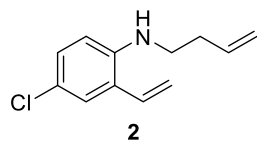

<sup>1</sup>H-NMR (300 MHz, CDCl<sub>3</sub>)

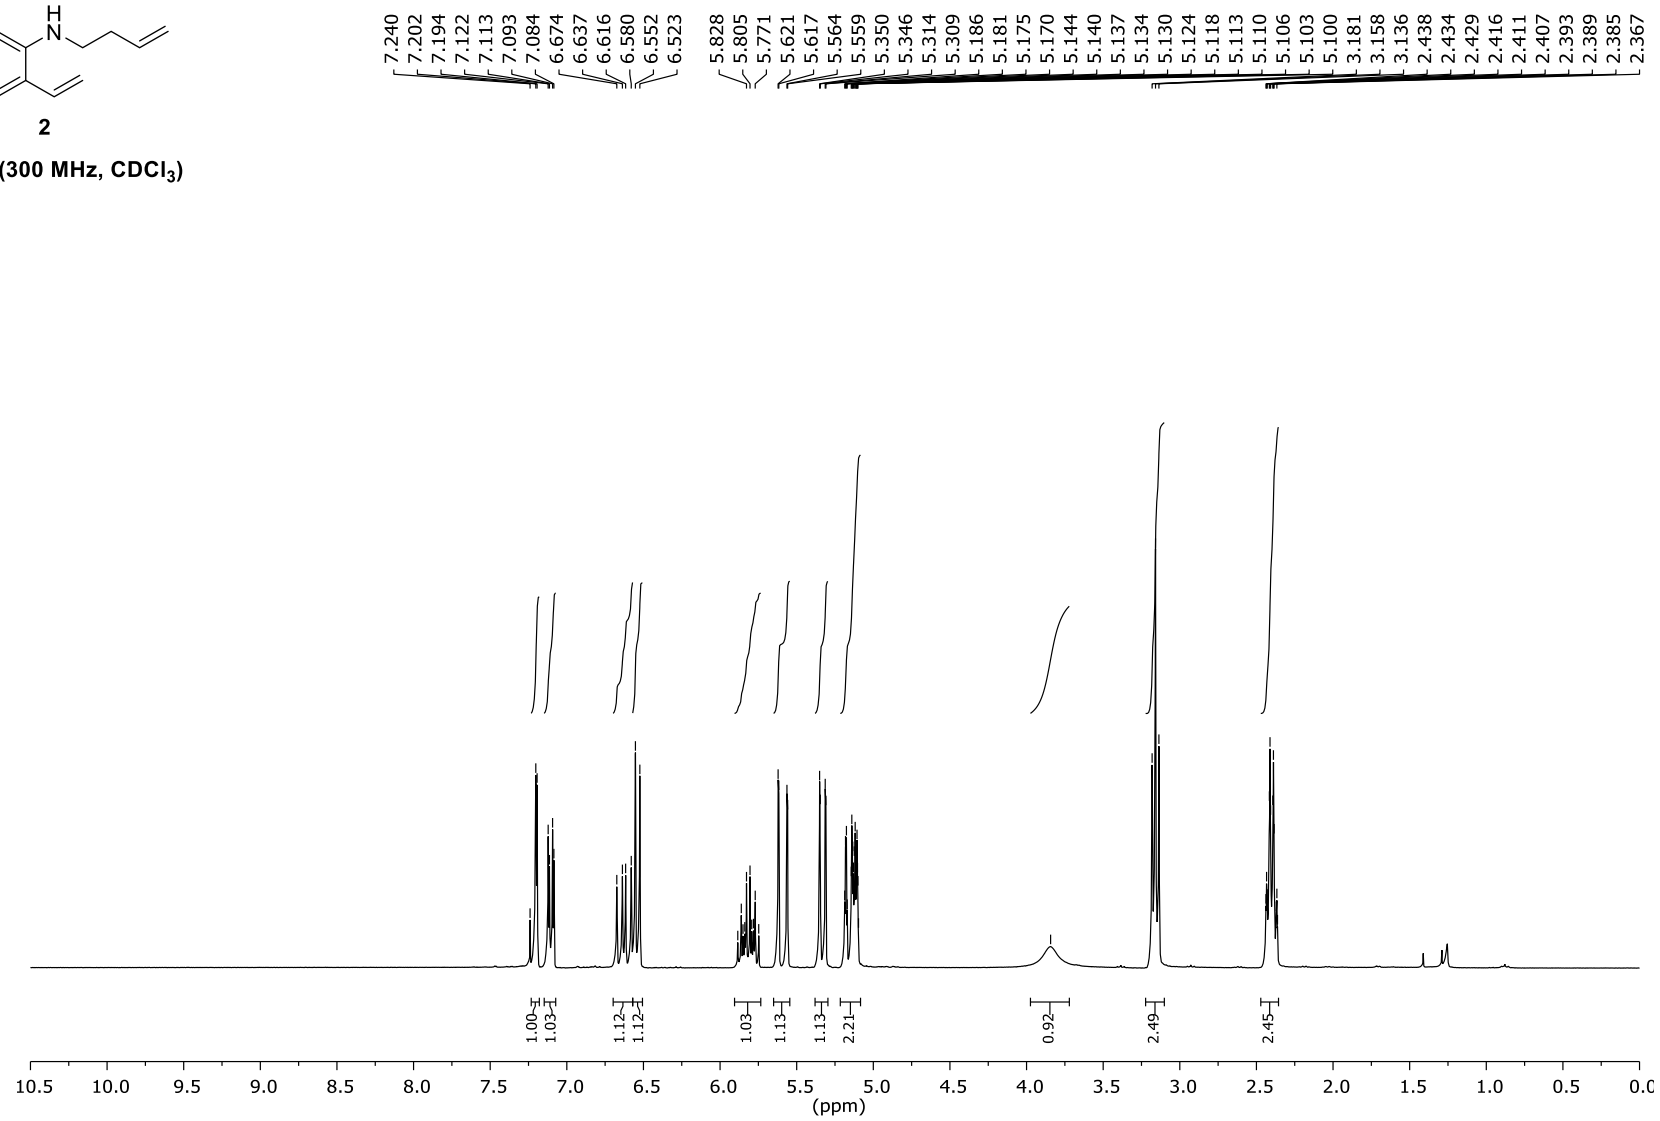

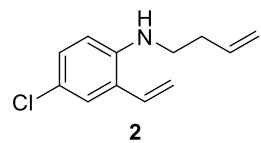

<sup>13</sup>C-NMR (75 MHz, CDCl<sub>3</sub>)

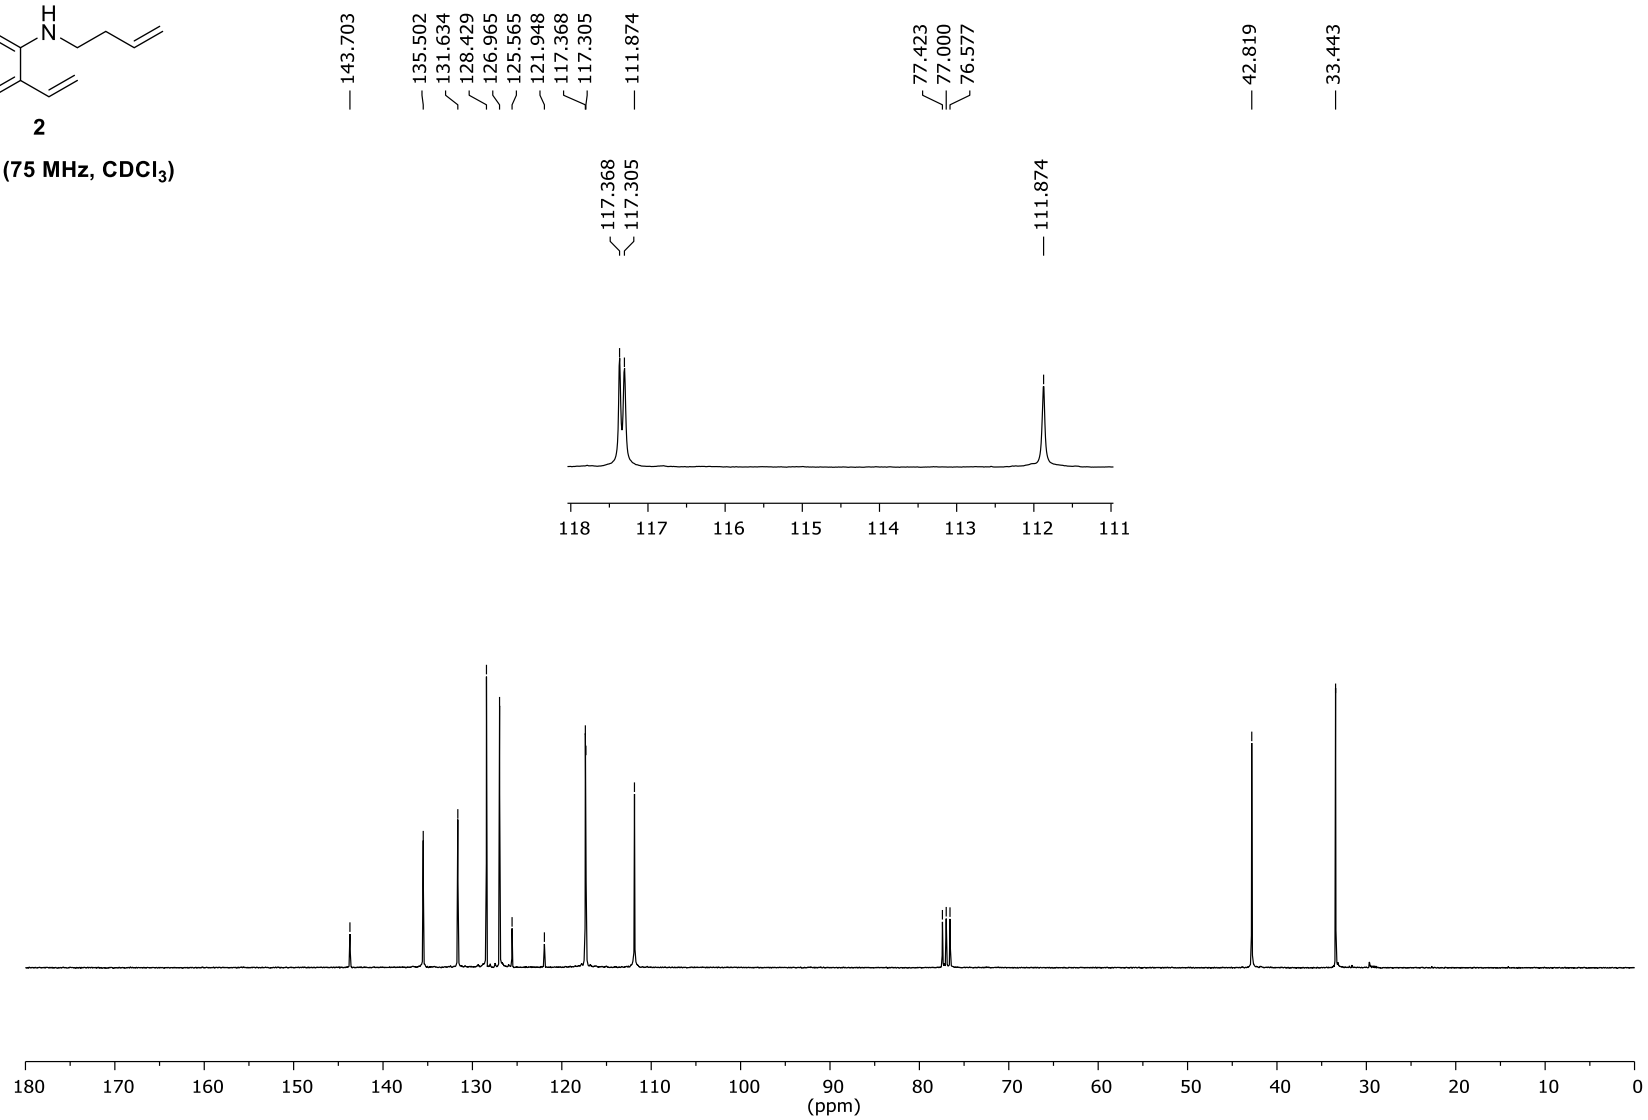

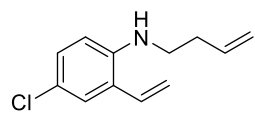

**2**

gCOSY-NMR (CDCl<sub>3</sub>)

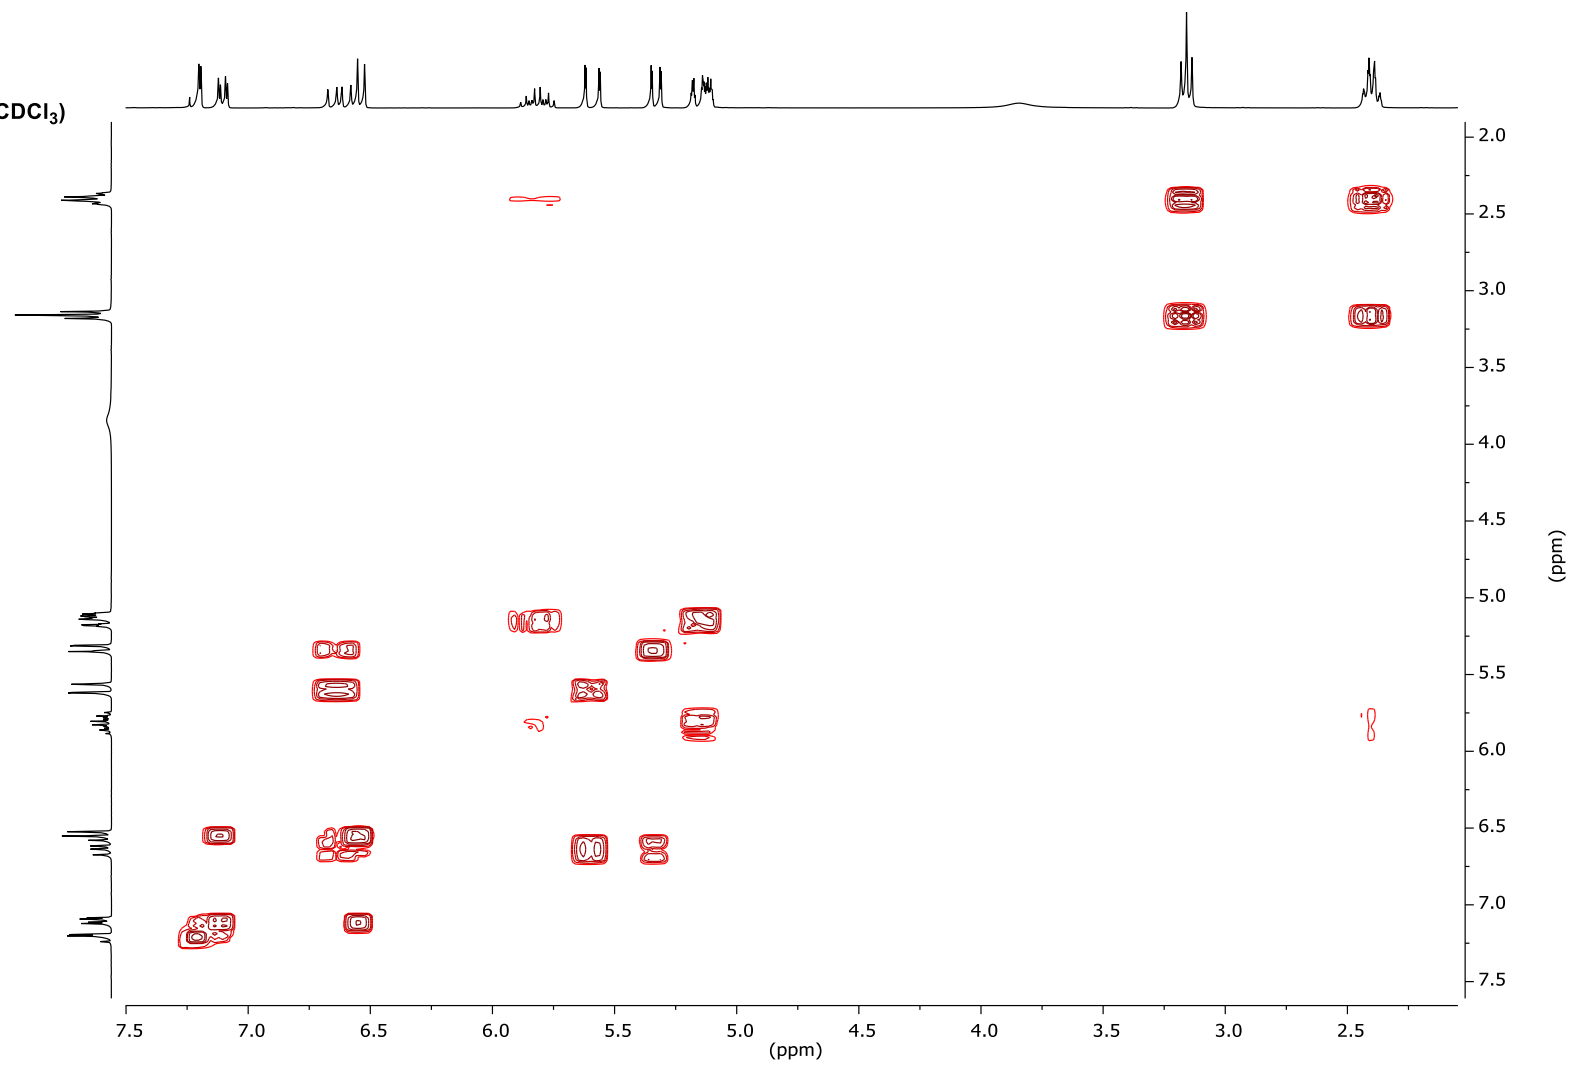

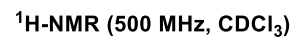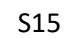



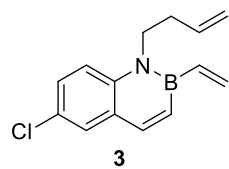

<sup>13</sup>C-NMR (125 MHz, CDCl<sub>3</sub>)

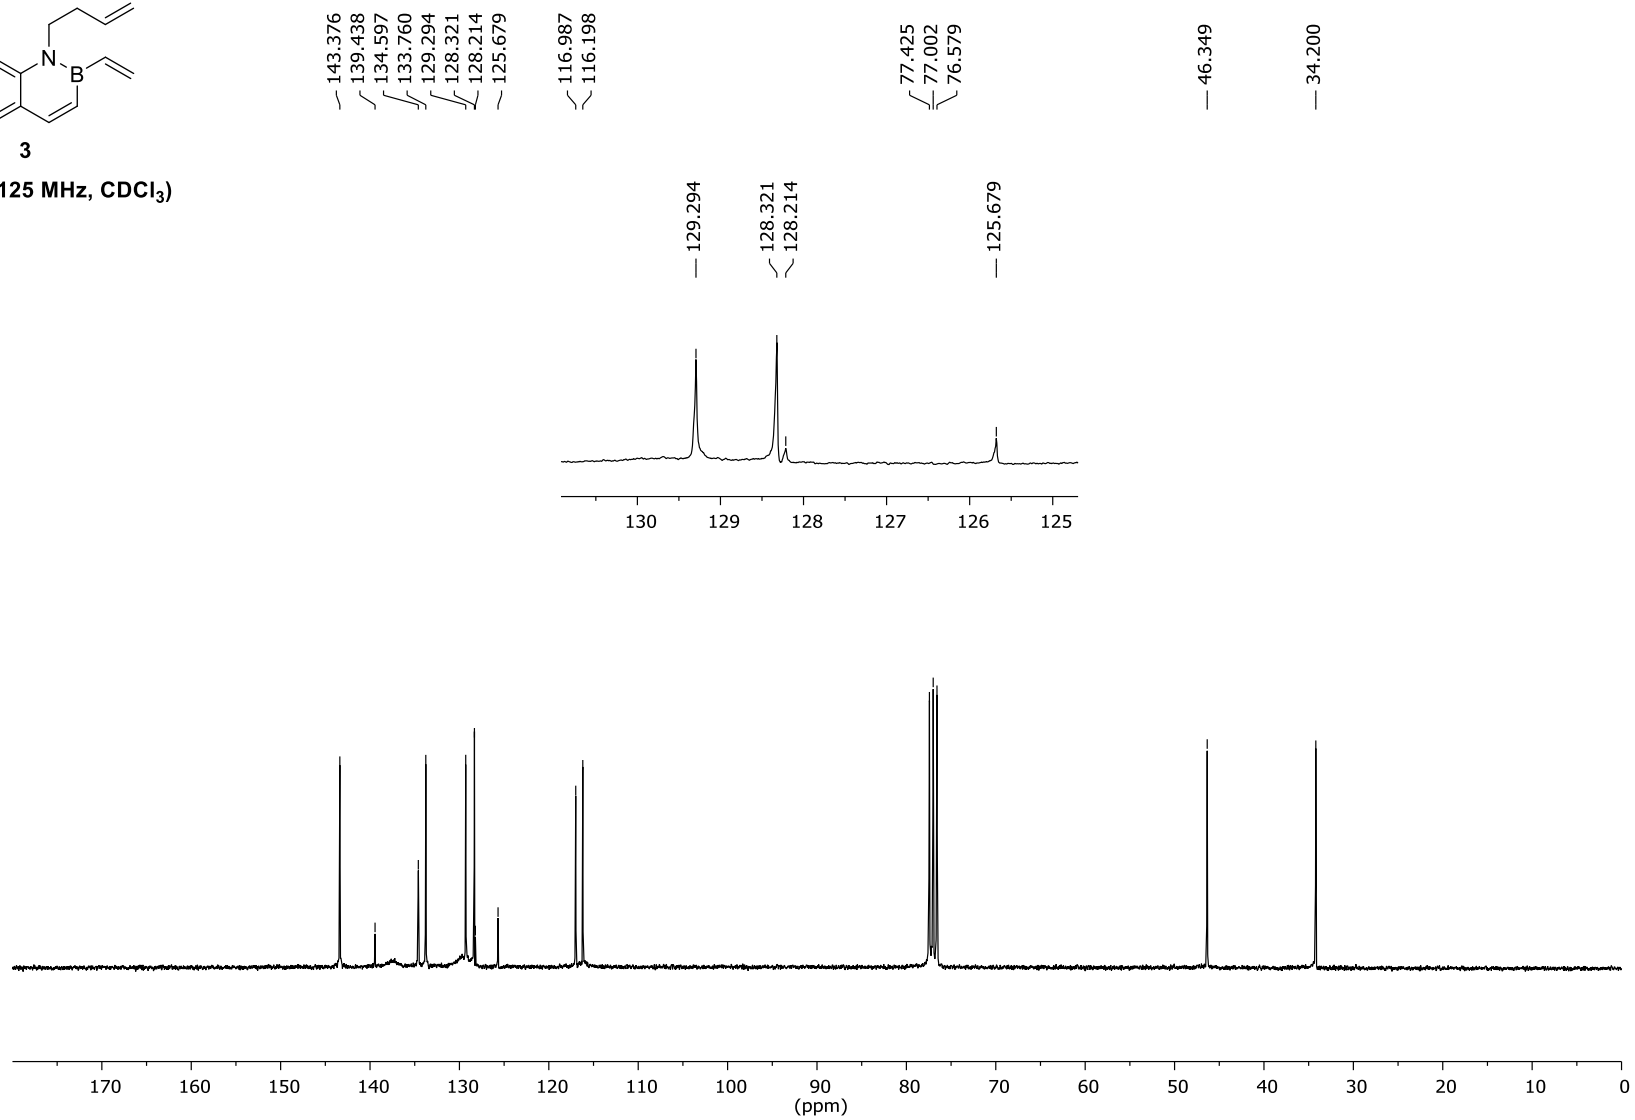

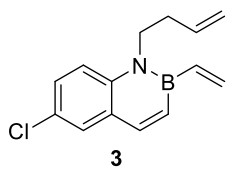

<sup>11</sup>B-NMR (160 MHz, CDCl<sub>3</sub>)

— 33.827

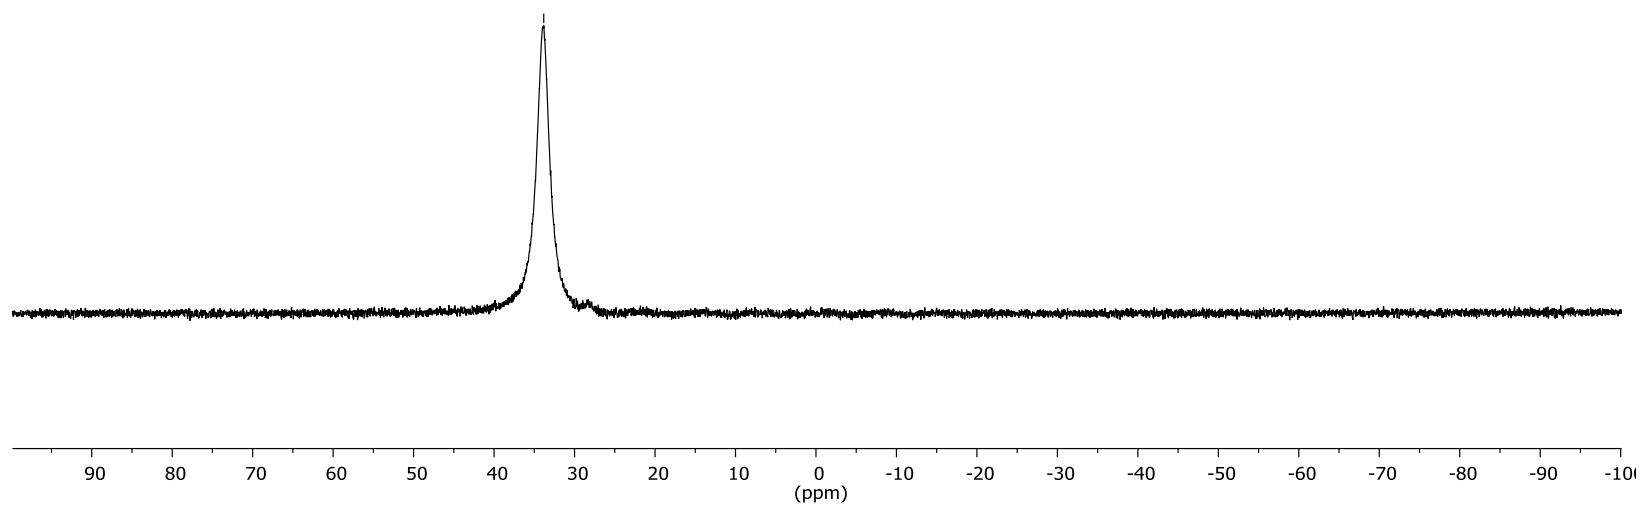

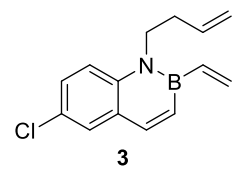

gCOSY-NMR (CDCl<sub>3</sub>)

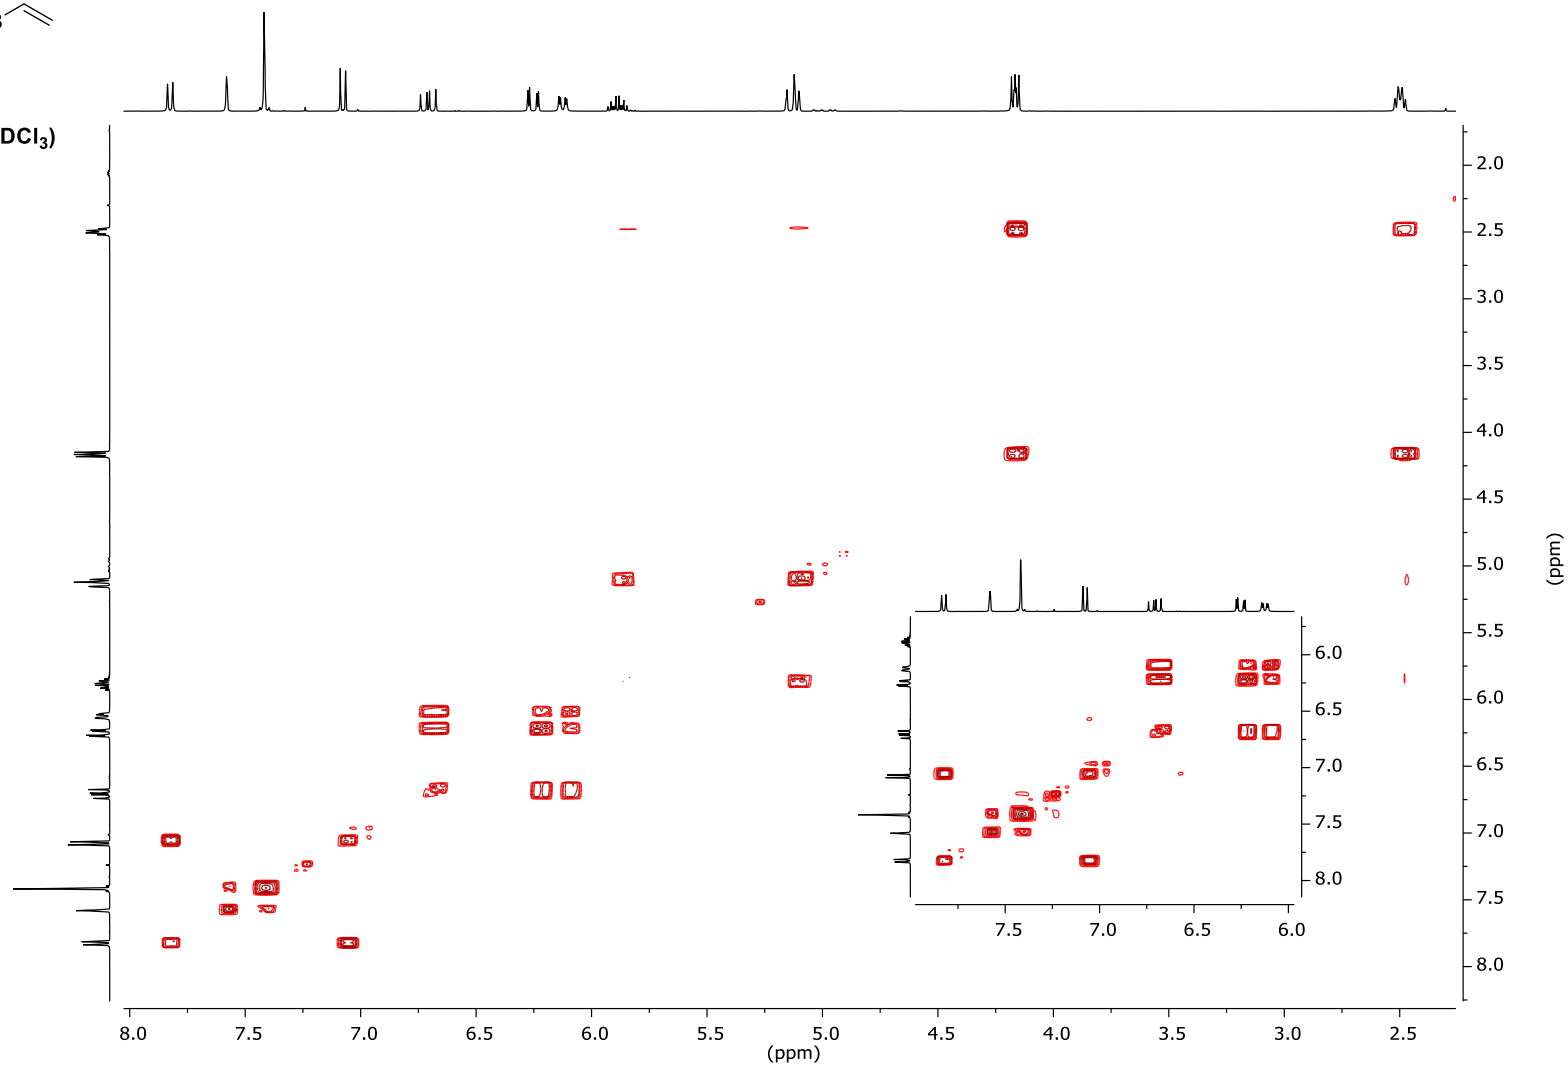

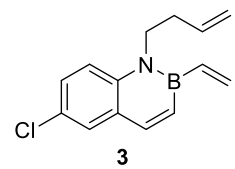

gHSQC-NMR (CDCl<sub>3</sub>)

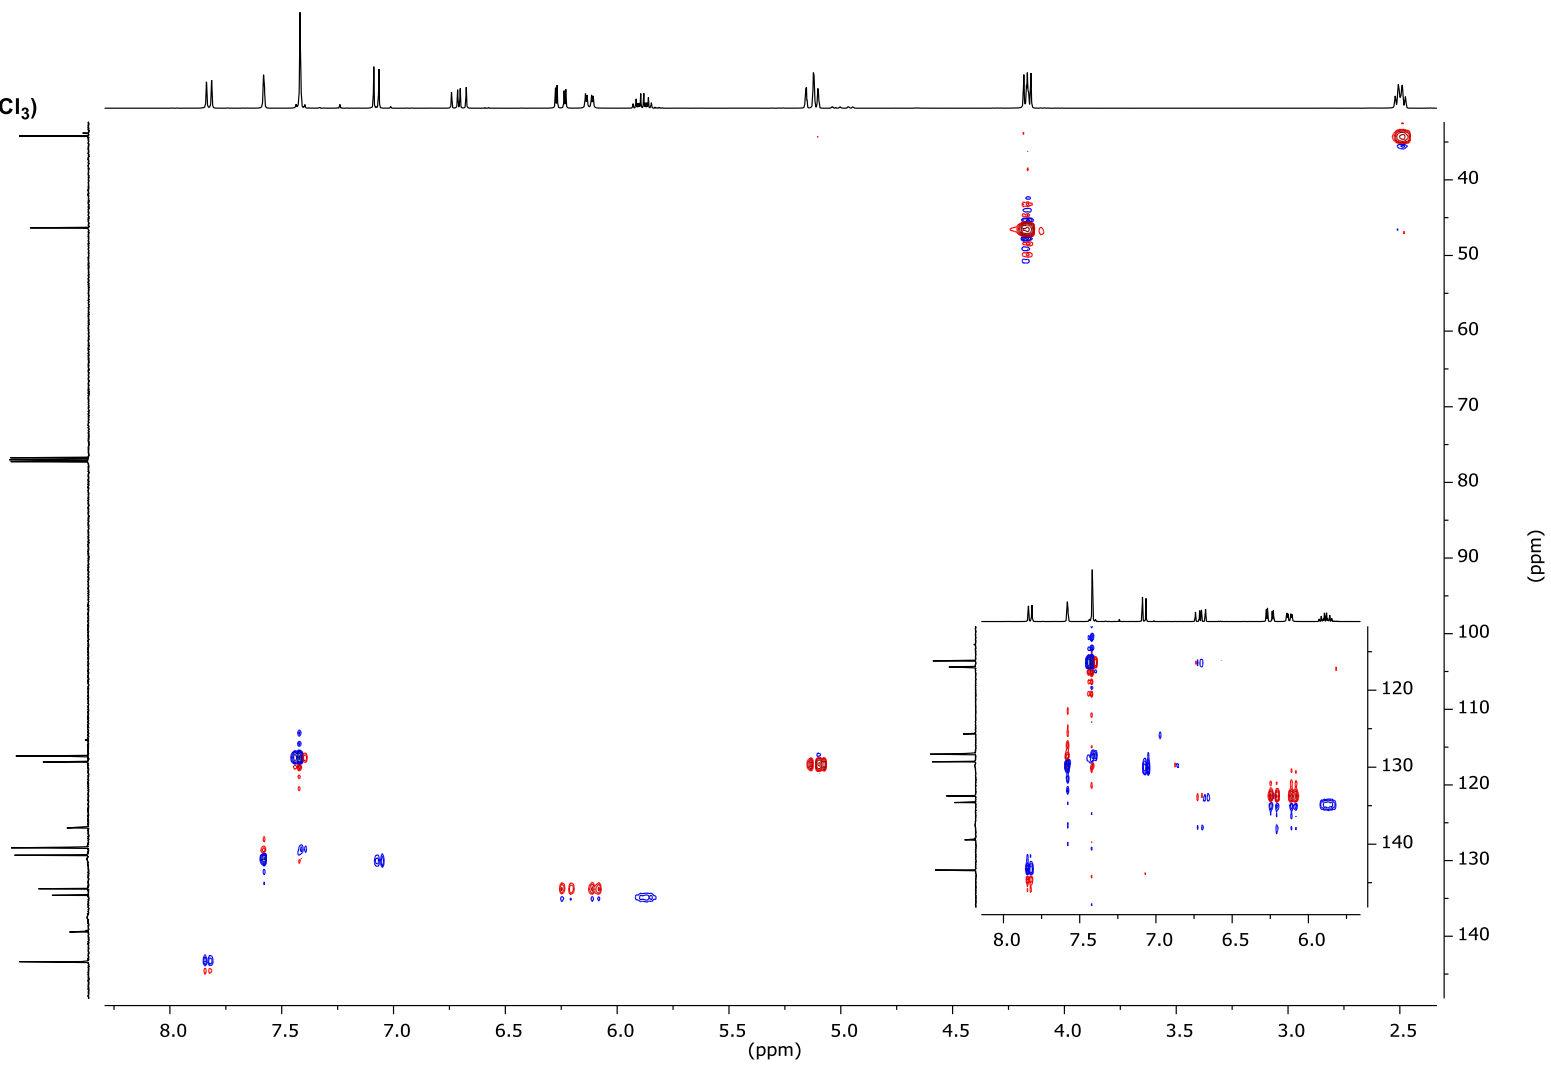

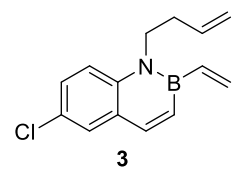

gHMBC-NMR (CDCl<sub>3</sub>)

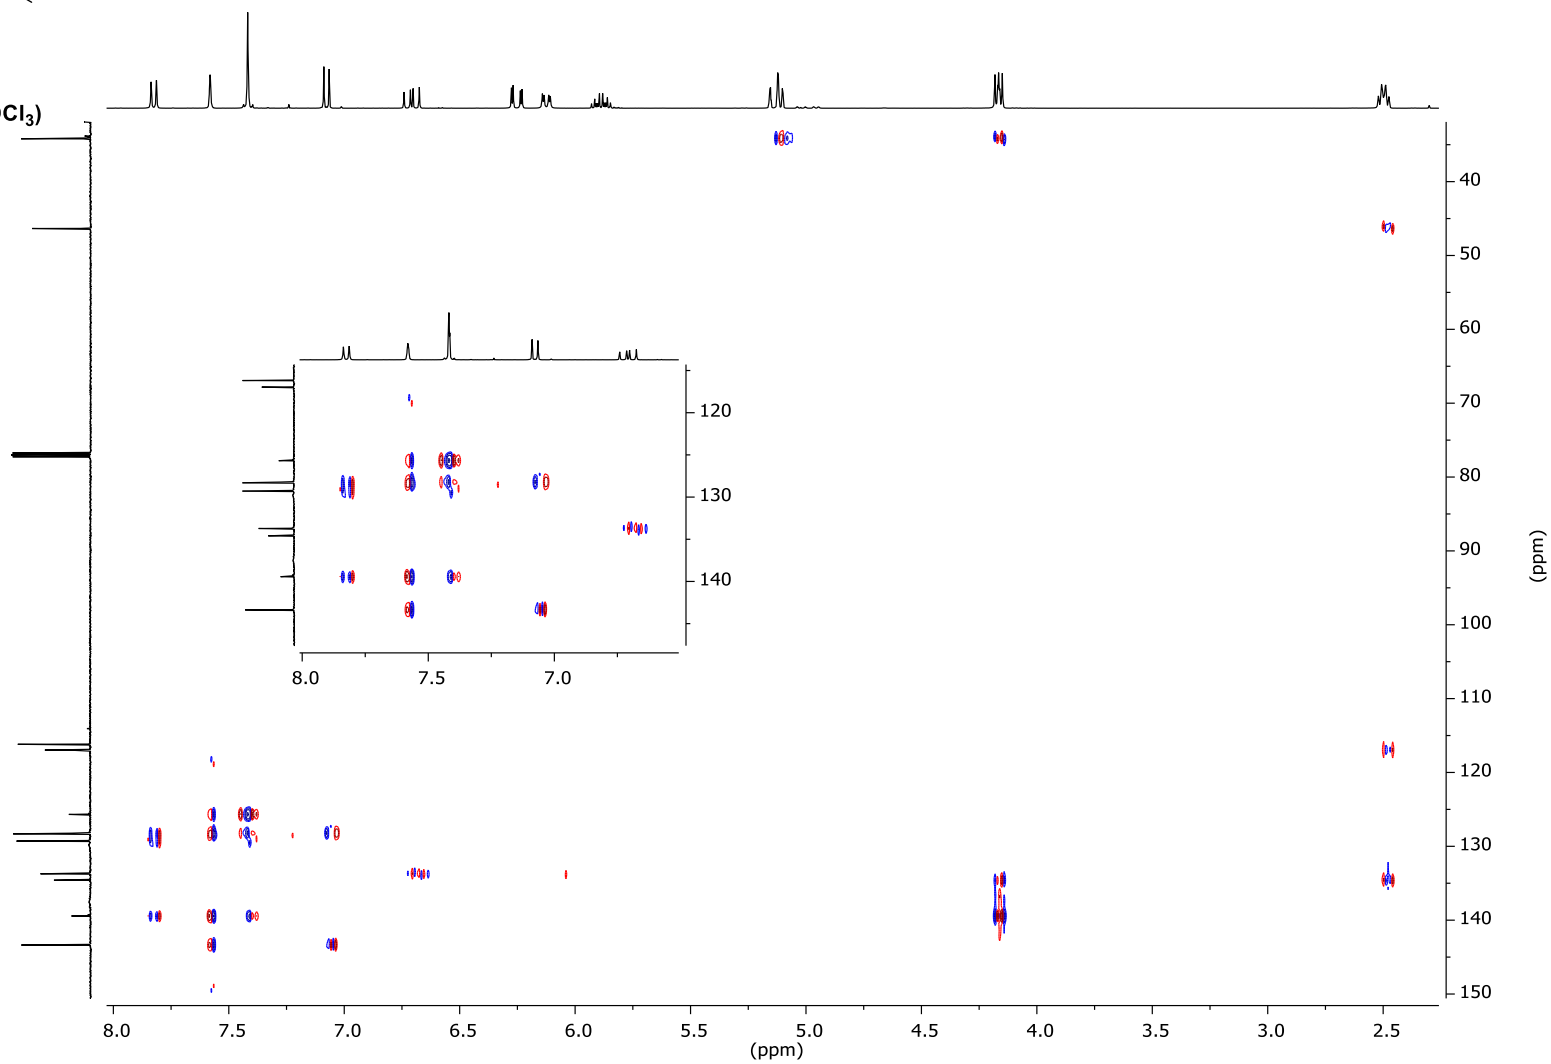

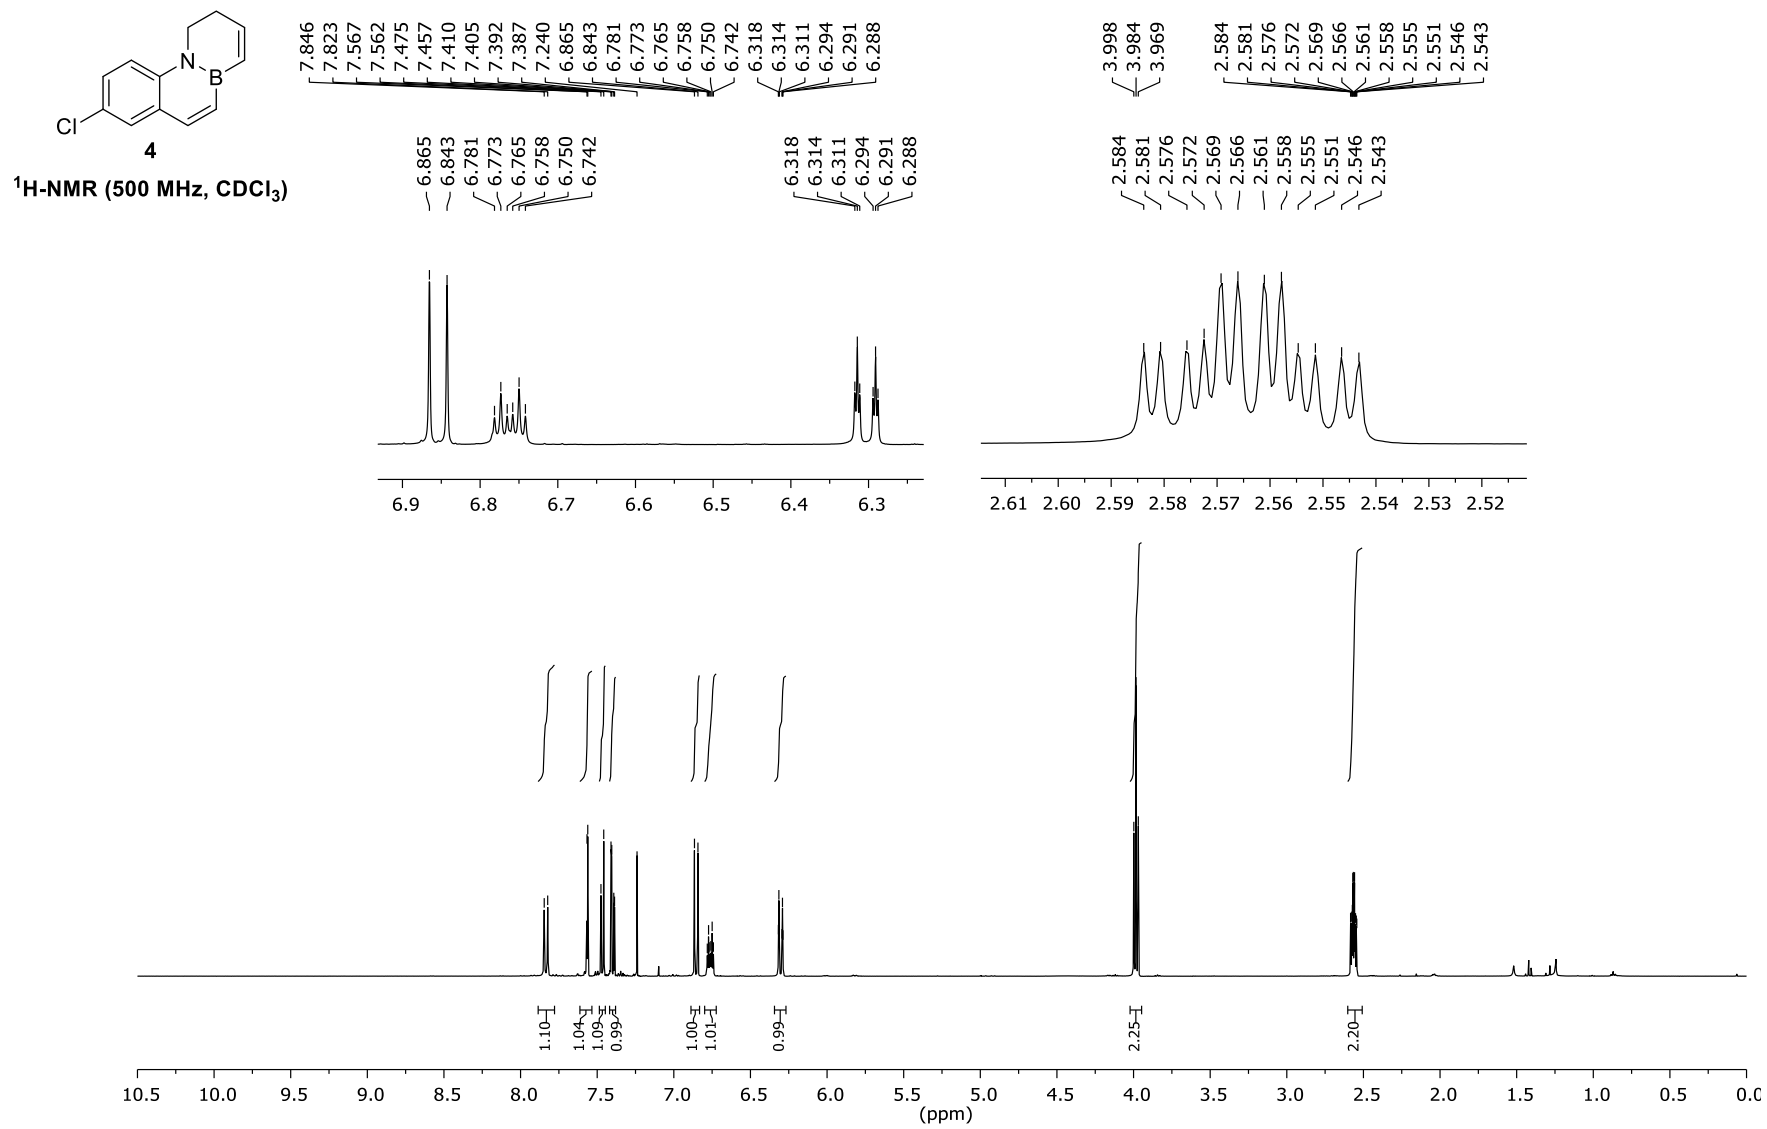

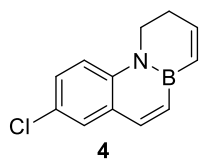

<sup>13</sup>C-NMR (125 MHz, CDCl<sub>3</sub>)

144.018  
142.734  
140.336

129.215  
128.247  
127.937  
125.058

114.933

77.254  
77.000  
76.745

42.404

28.172

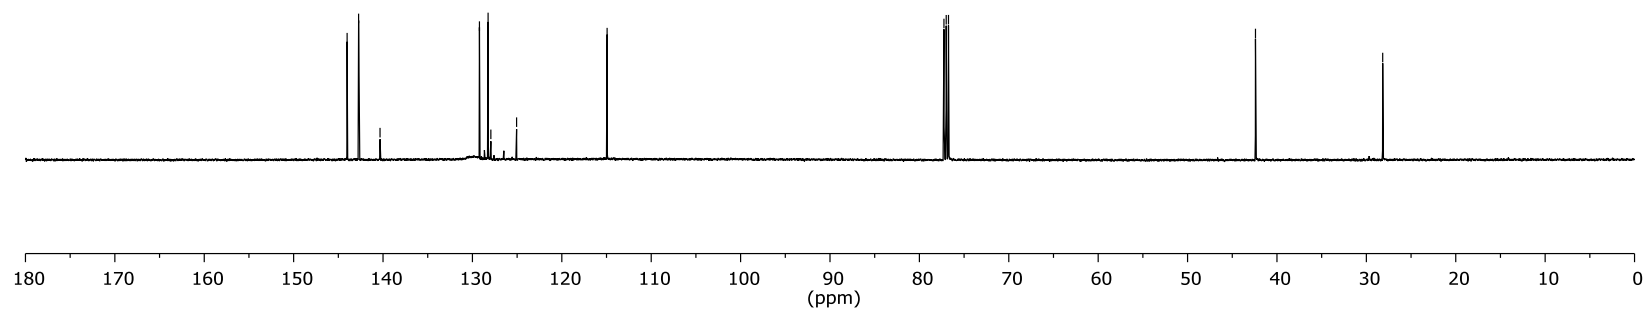

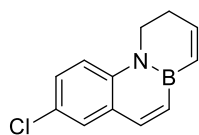

**4**

**$^{11}\text{B}$ -NMR (160 MHz,  $\text{CDCl}_3$ )**

— 30.926

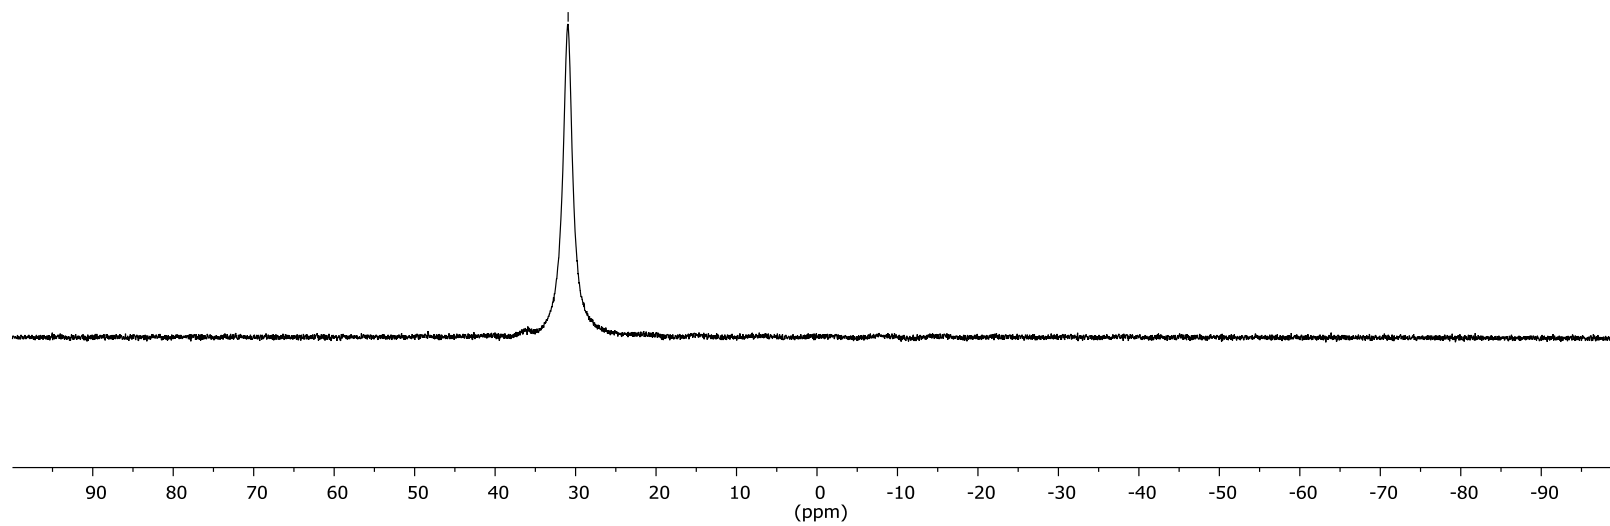



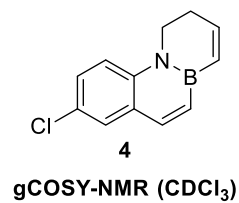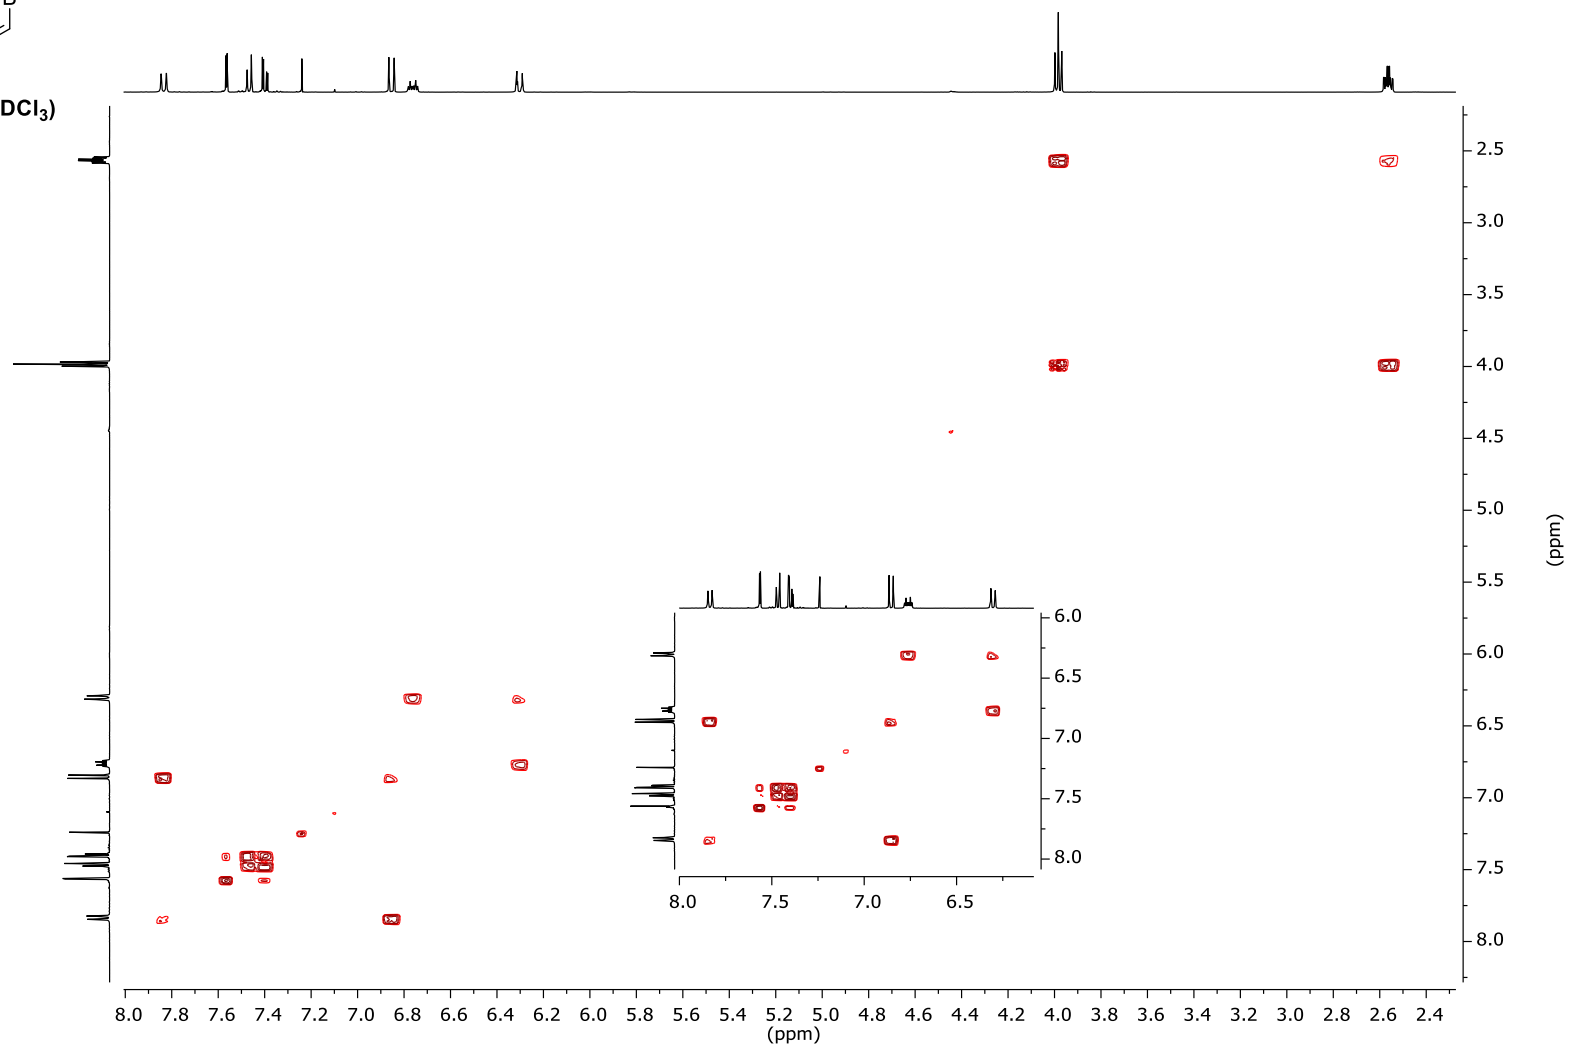

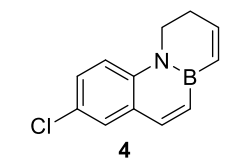

gHSQC-NMR (CDCl<sub>3</sub>)

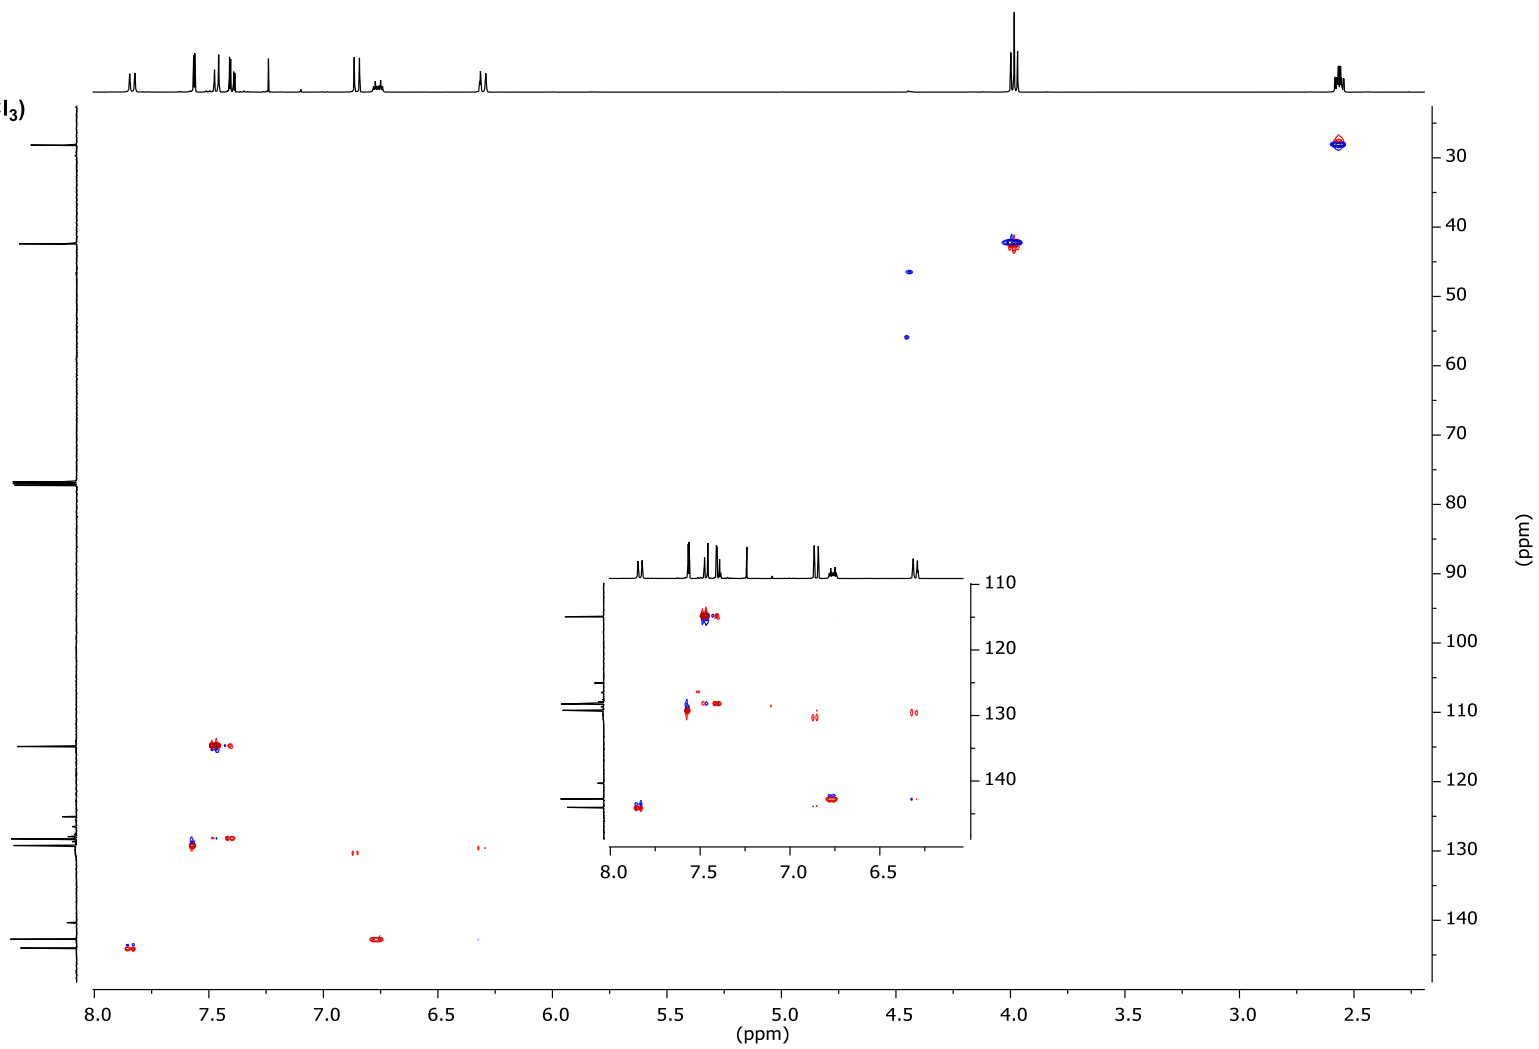

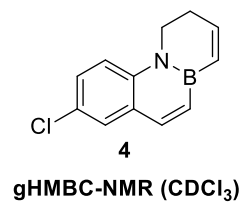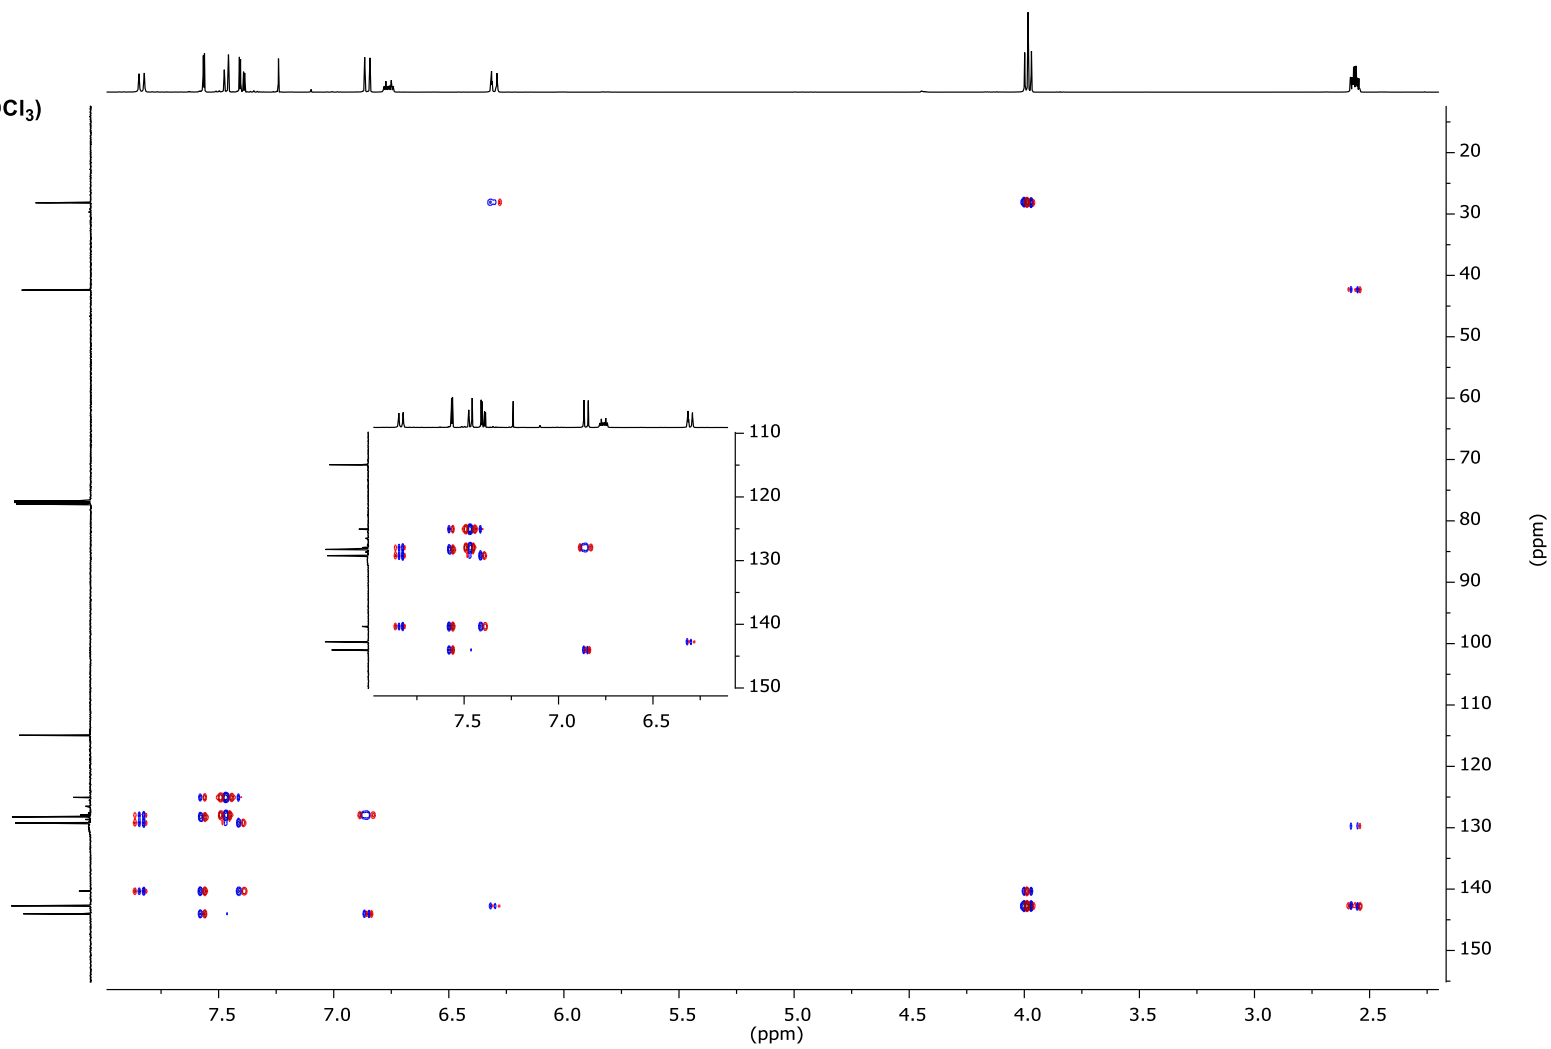

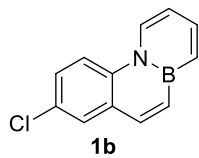

<sup>1</sup>H-NMR (500 MHz, CDCl<sub>3</sub>)

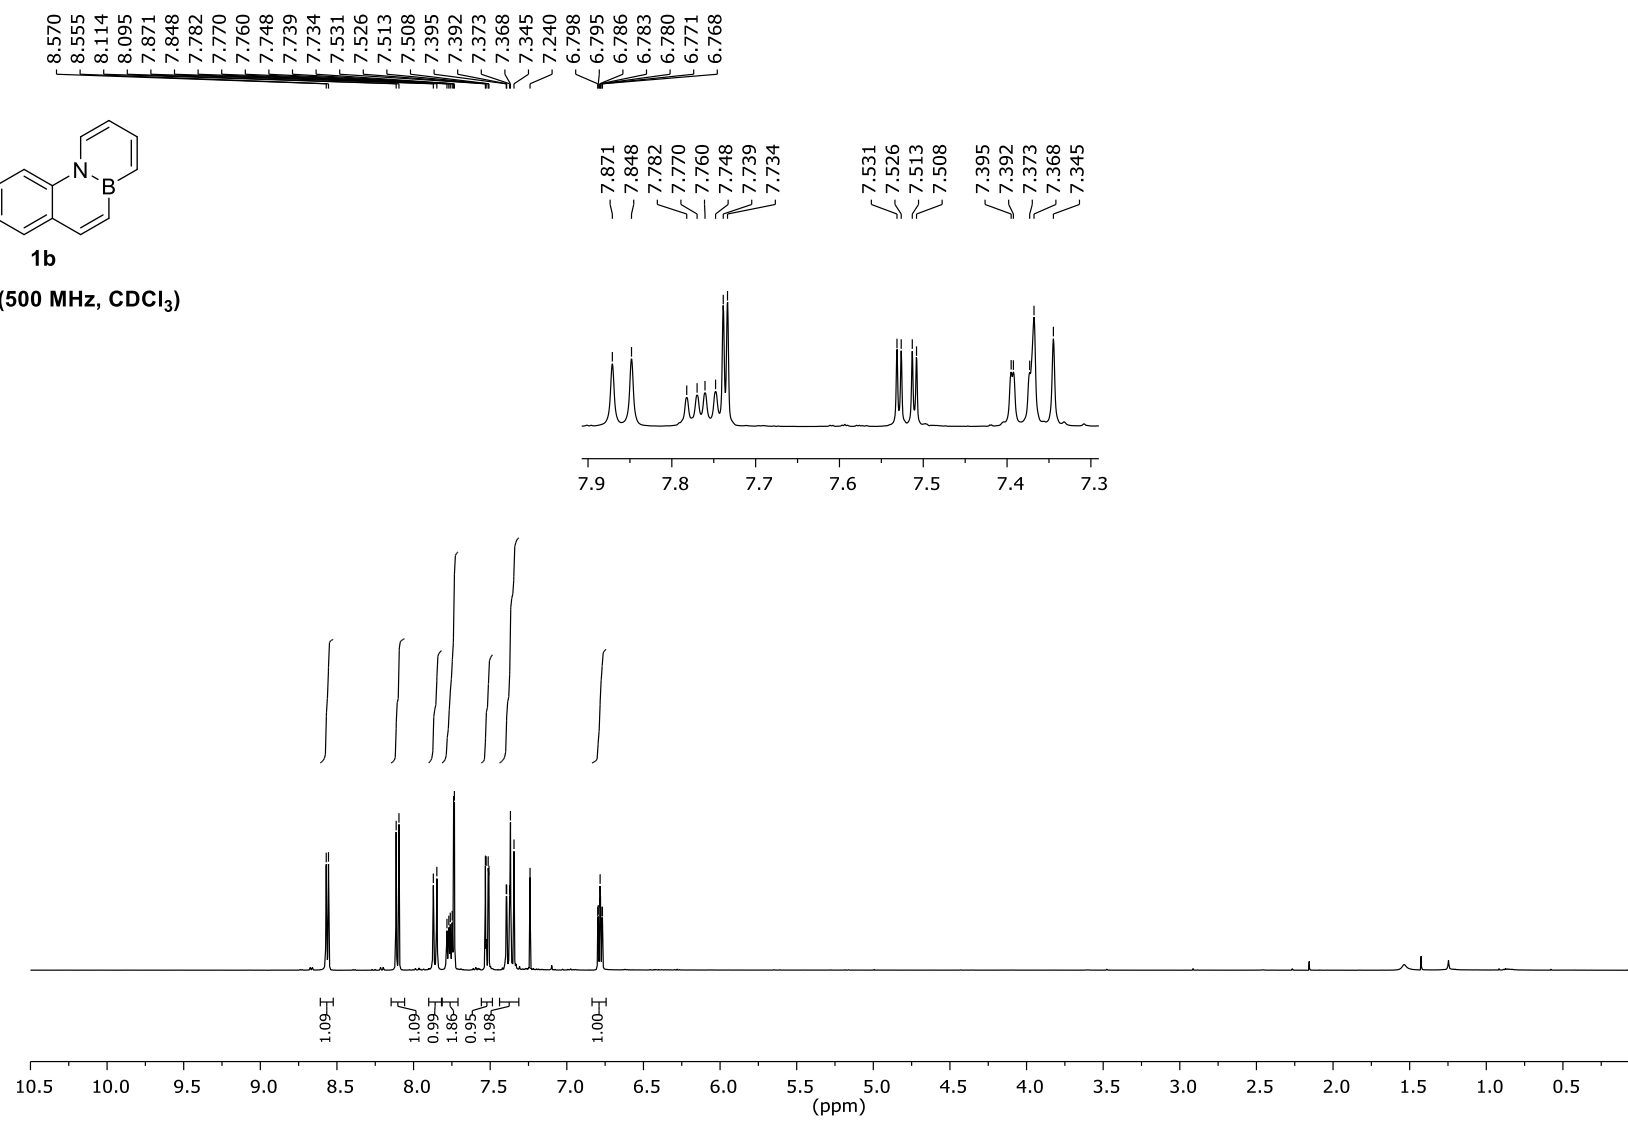

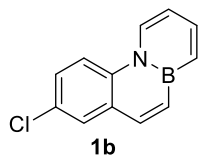

<sup>13</sup>C-NMR (125 MHz, CDCl<sub>3</sub>)

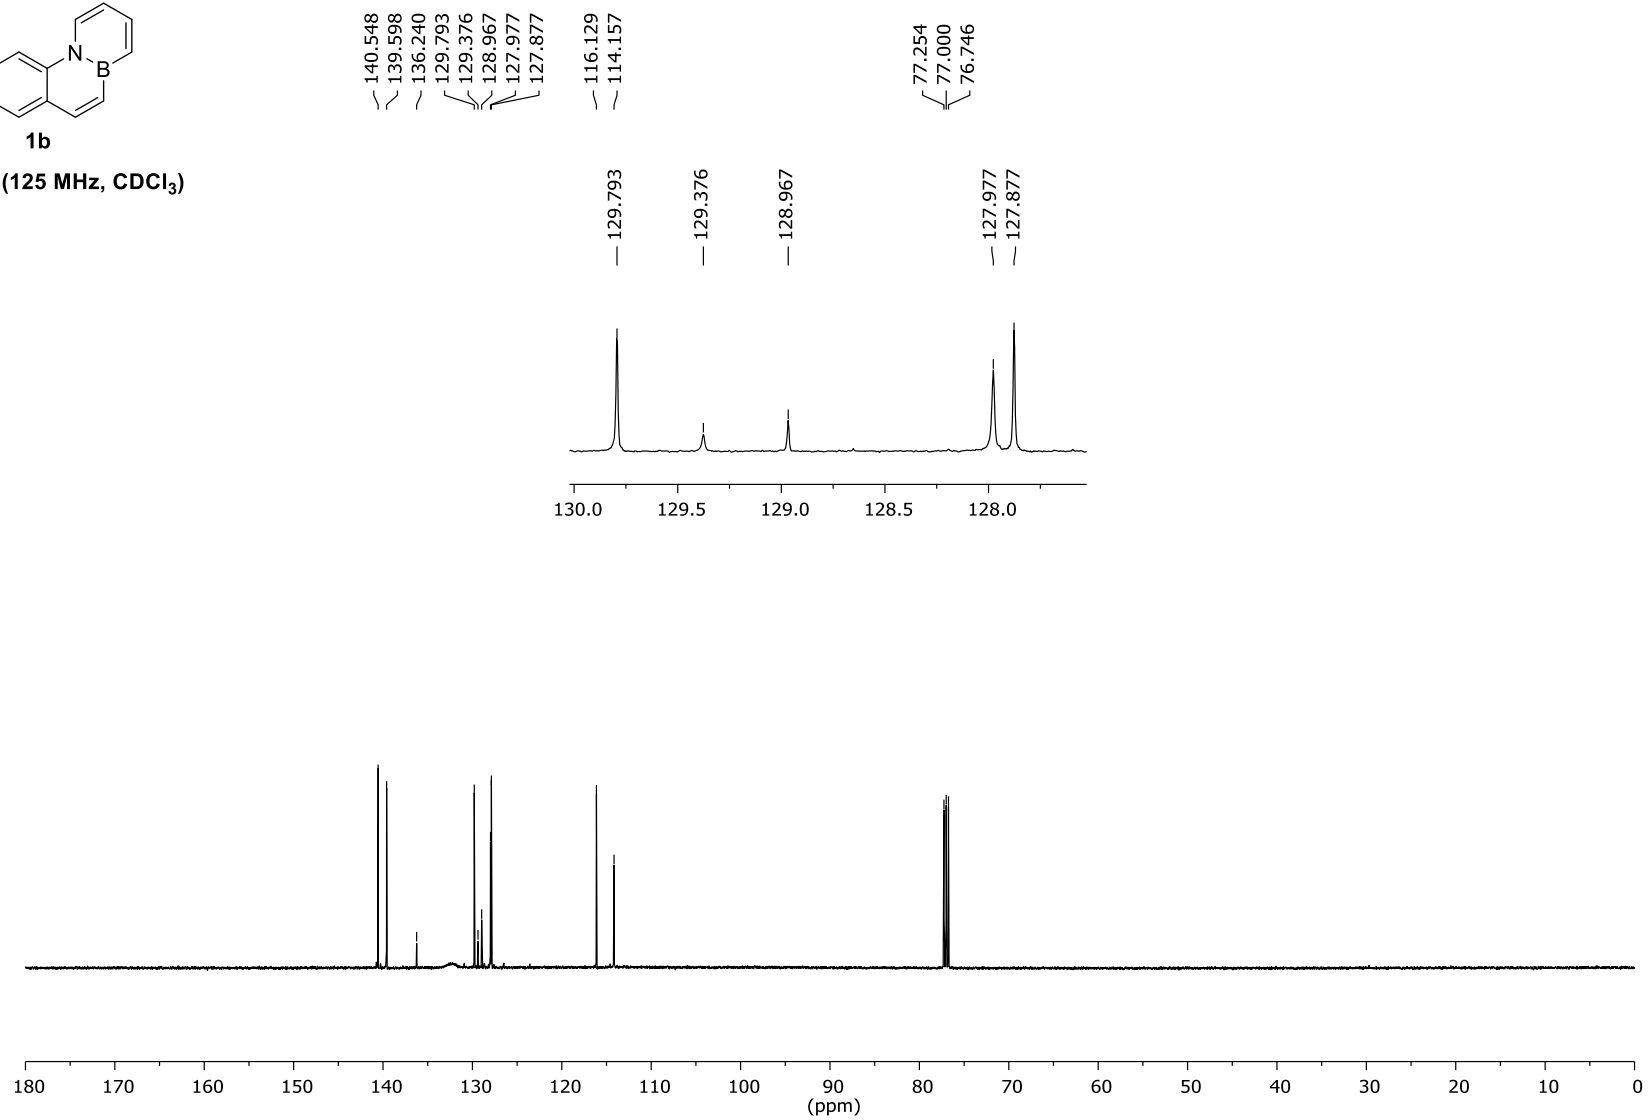



<sup>11</sup>B-NMR (160 MHz, CDCl<sub>3</sub>)

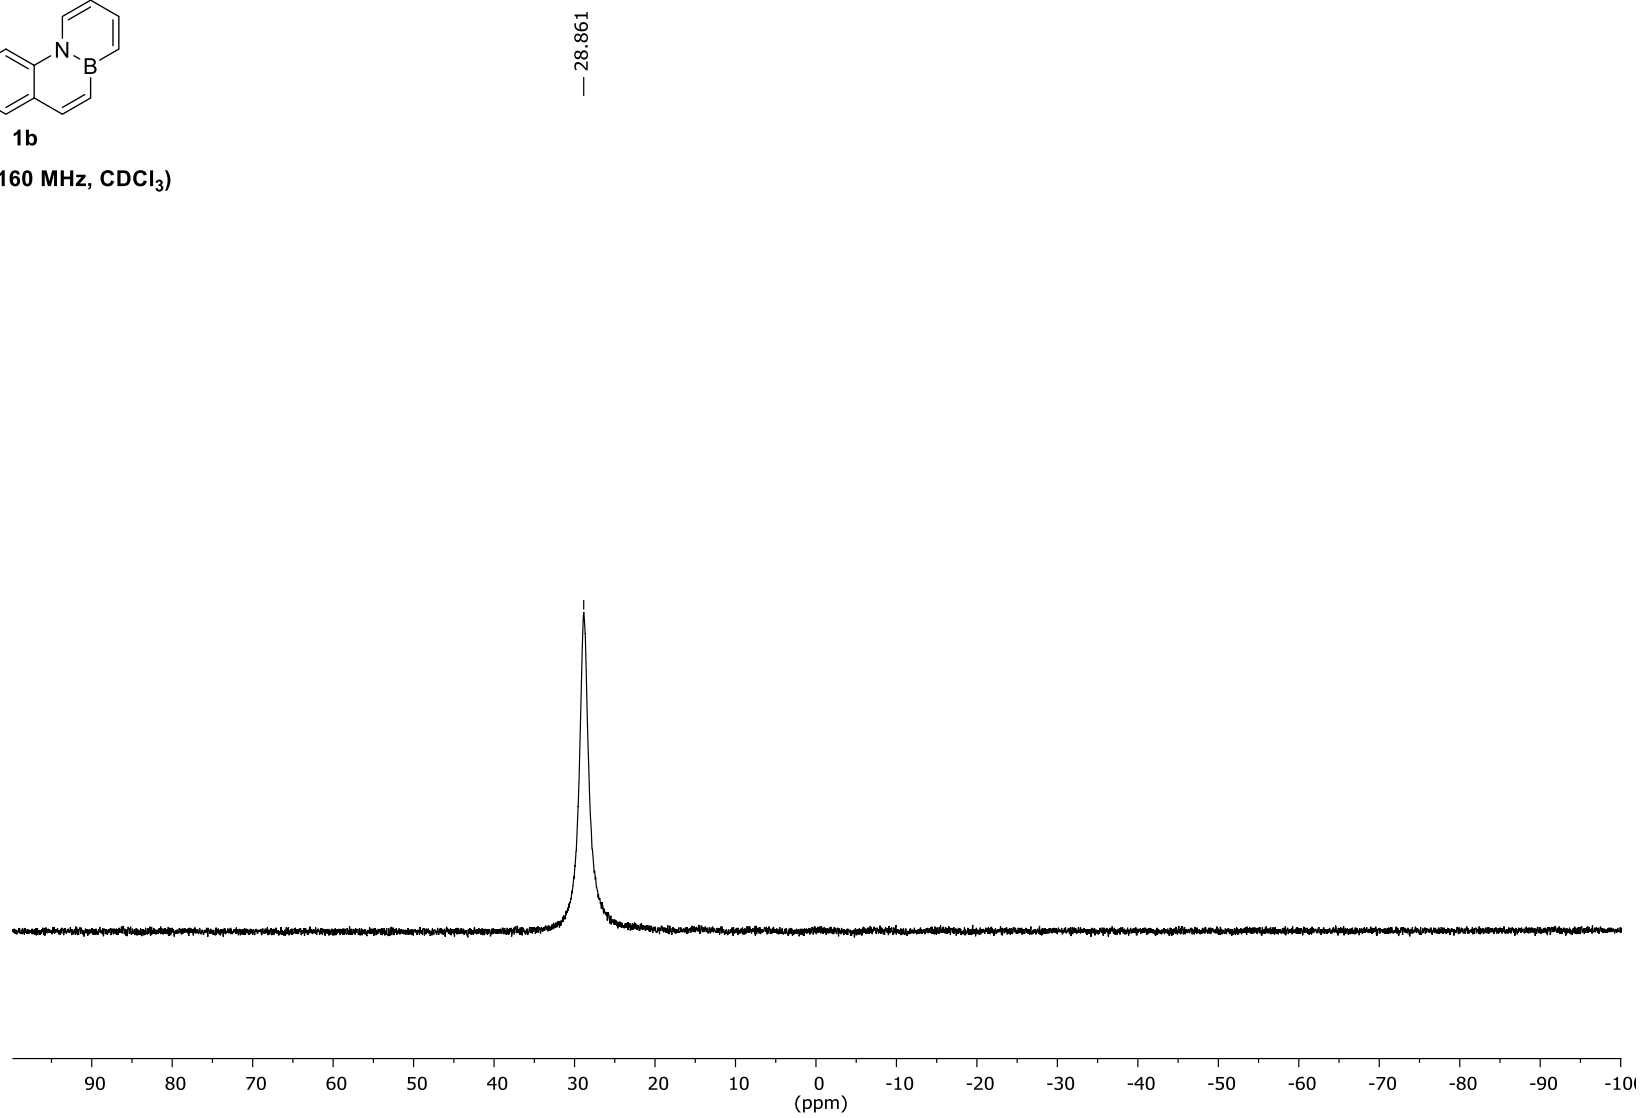

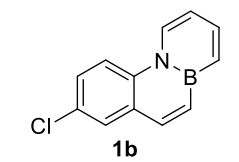

gCOSY-NMR (CDCl<sub>3</sub>)

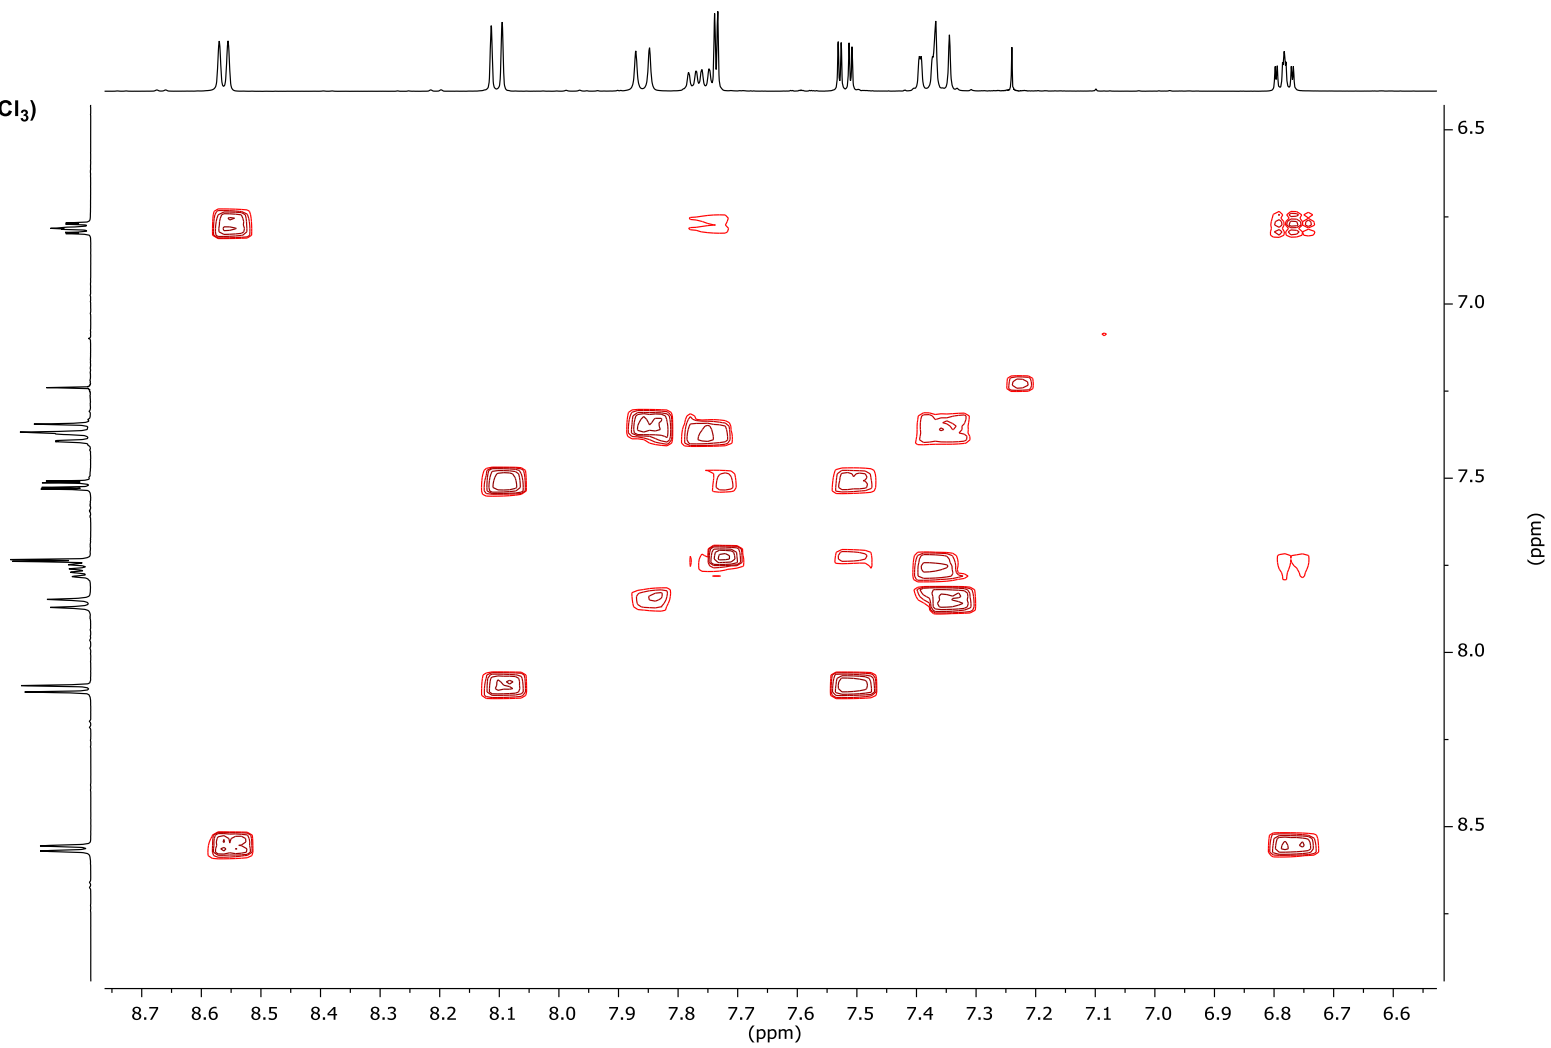



TOCSY-NMR (CDCl<sub>3</sub>)

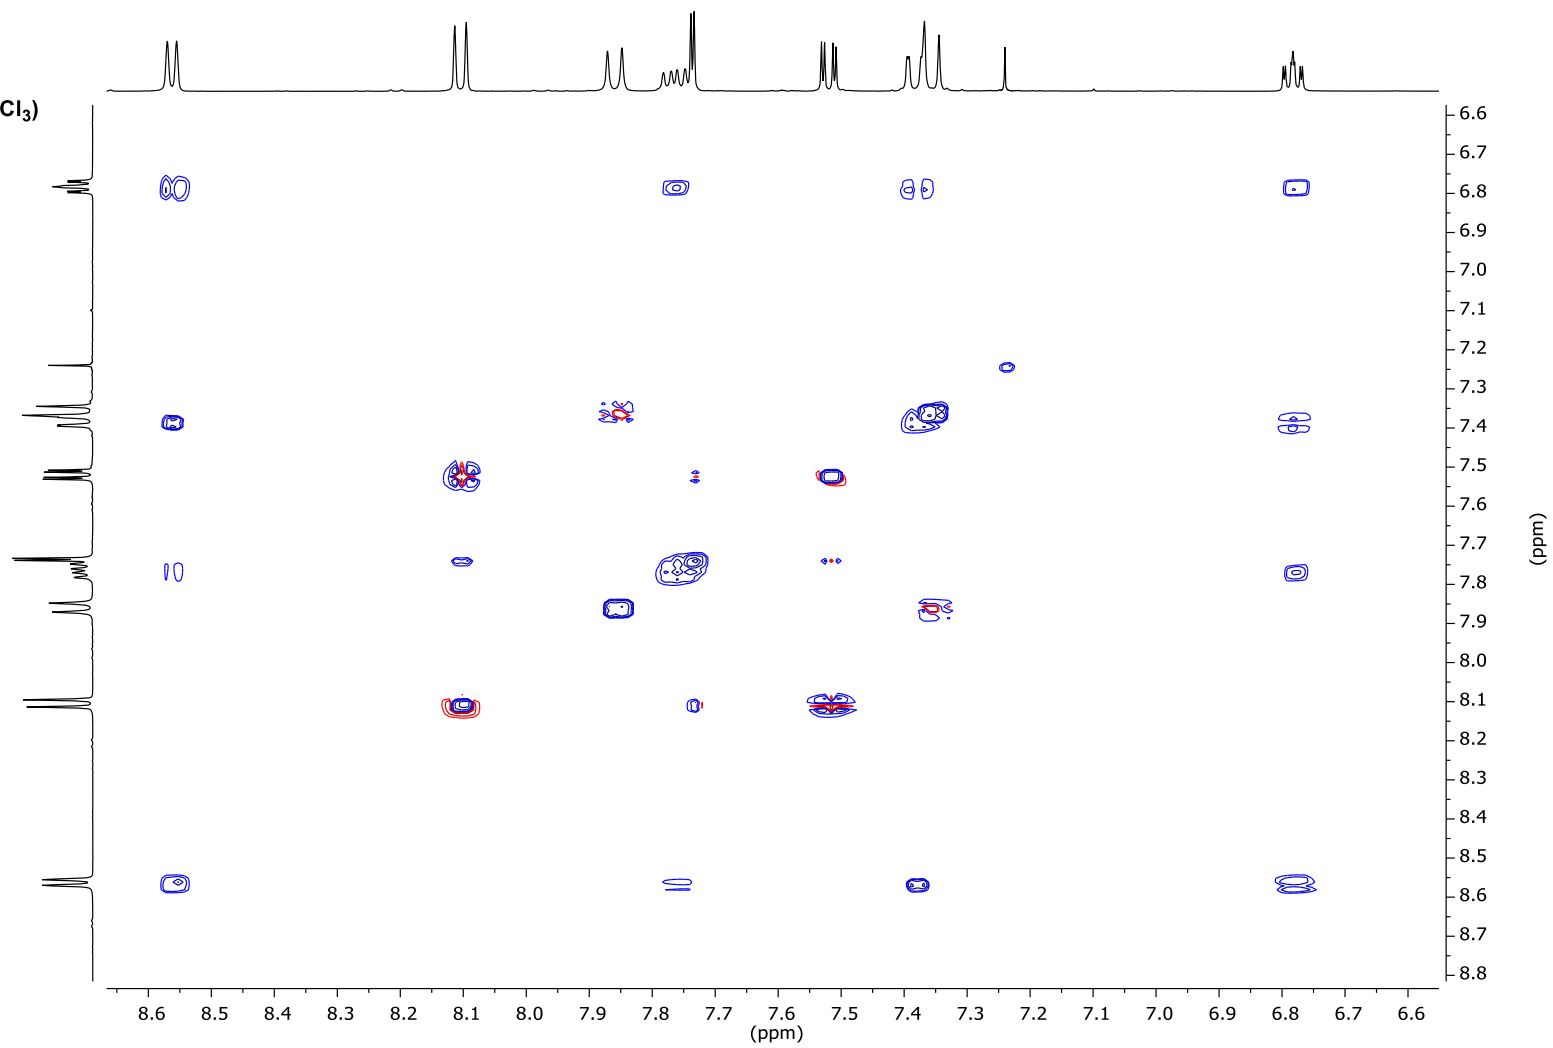



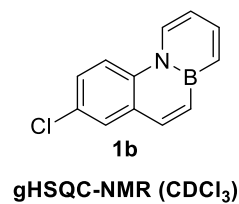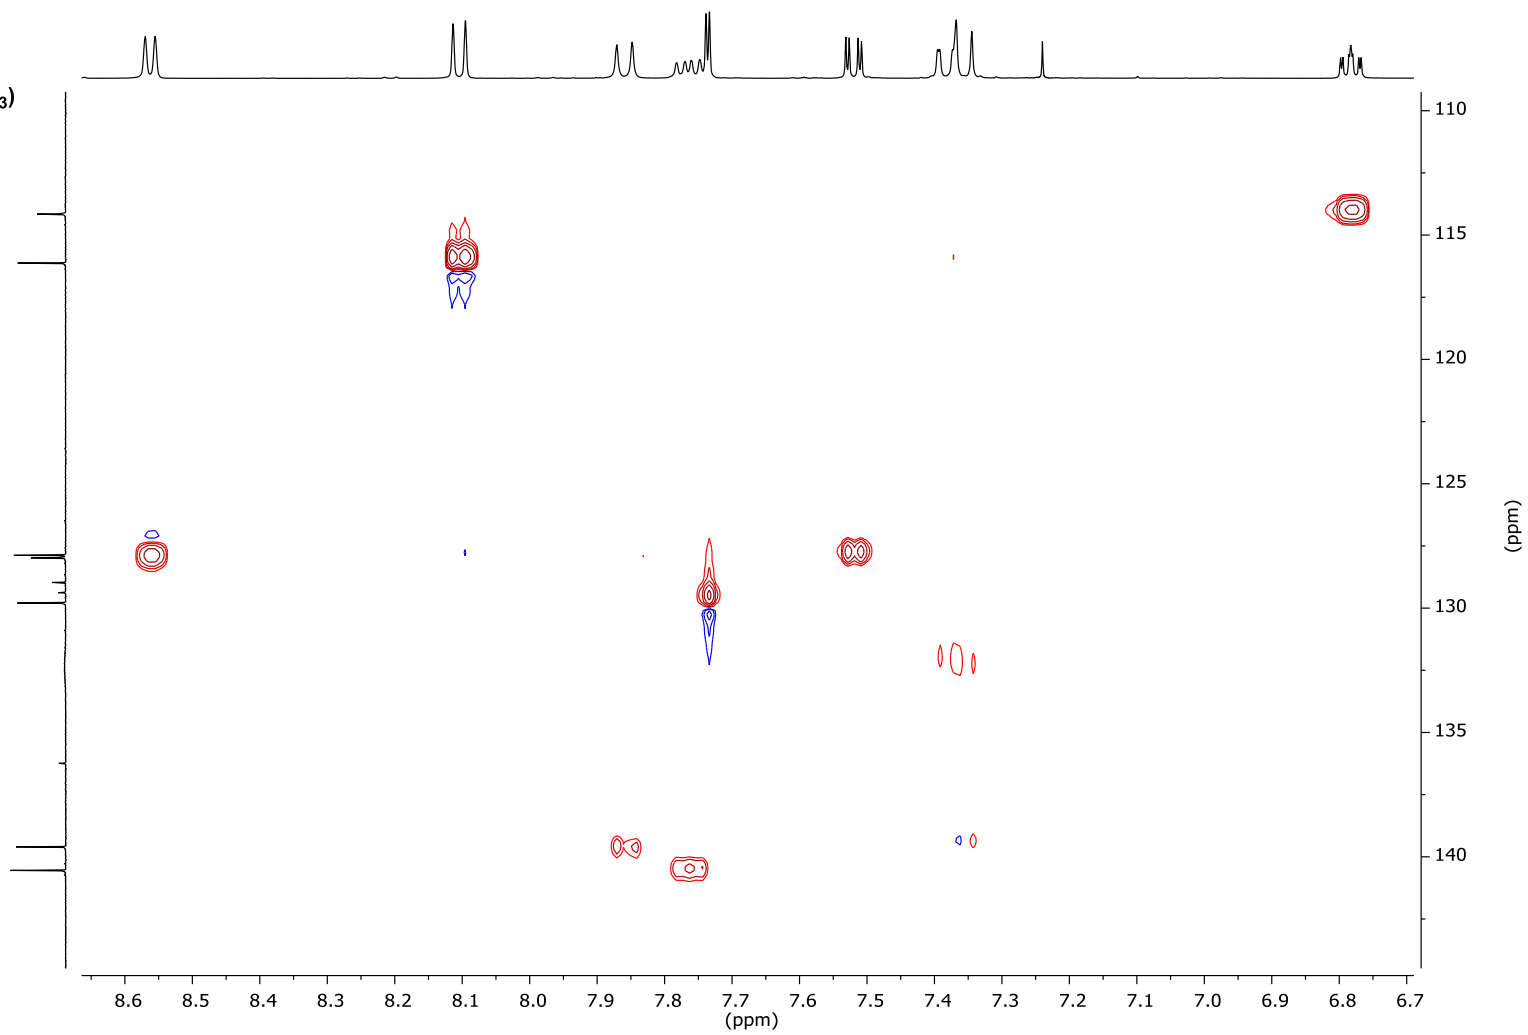

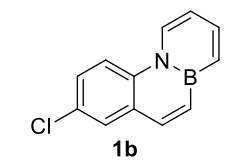

gHMBC-NMR (CDCl<sub>3</sub>)

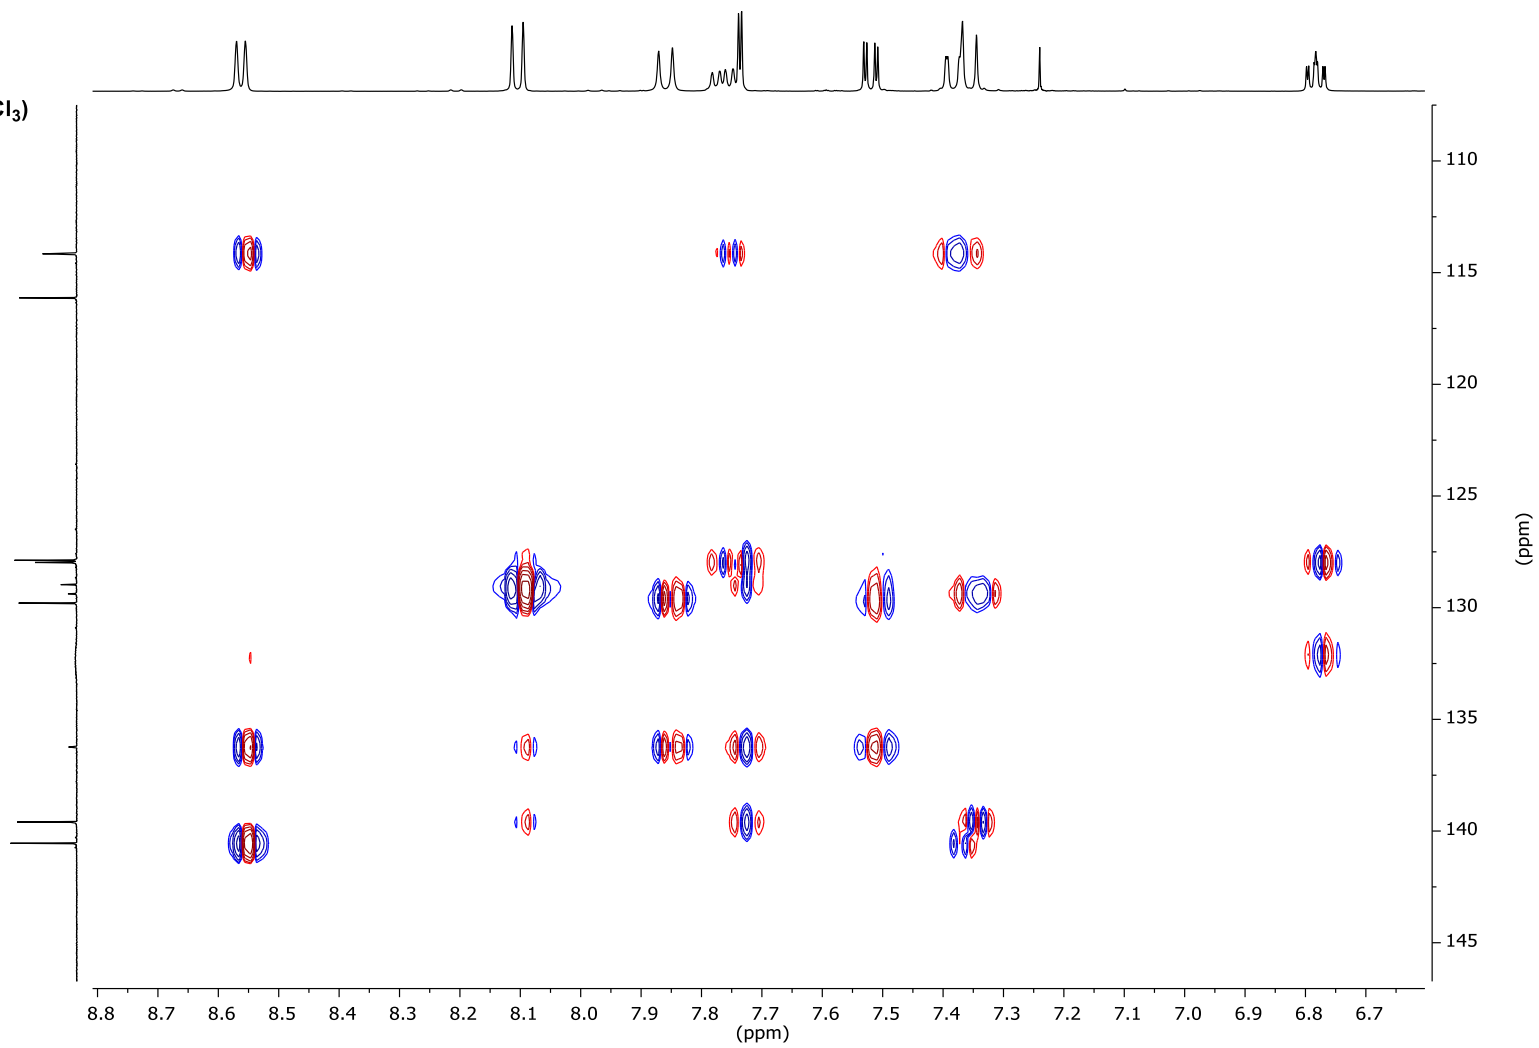

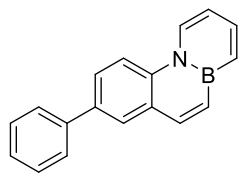

**1c**

<sup>1</sup>H-NMR (500 MHz, CDCl<sub>3</sub>)

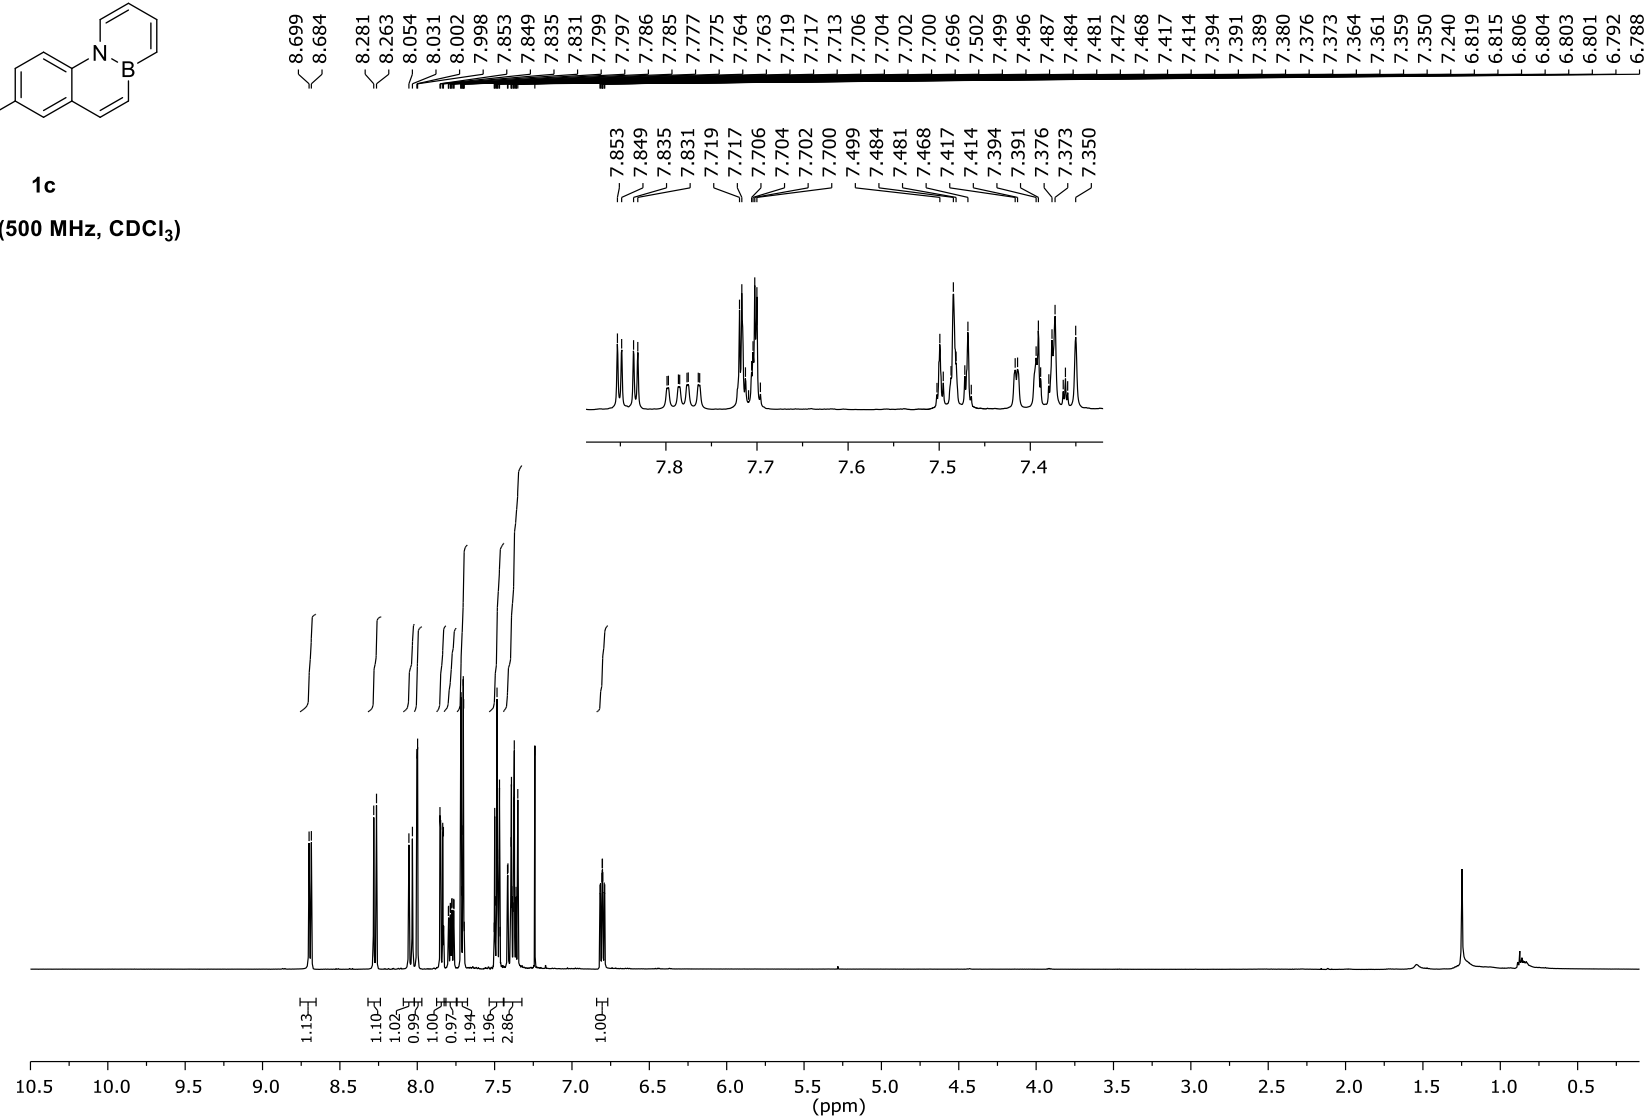

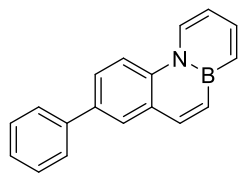

**1c**

<sup>13</sup>C-NMR (125 MHz, CDCl<sub>3</sub>)

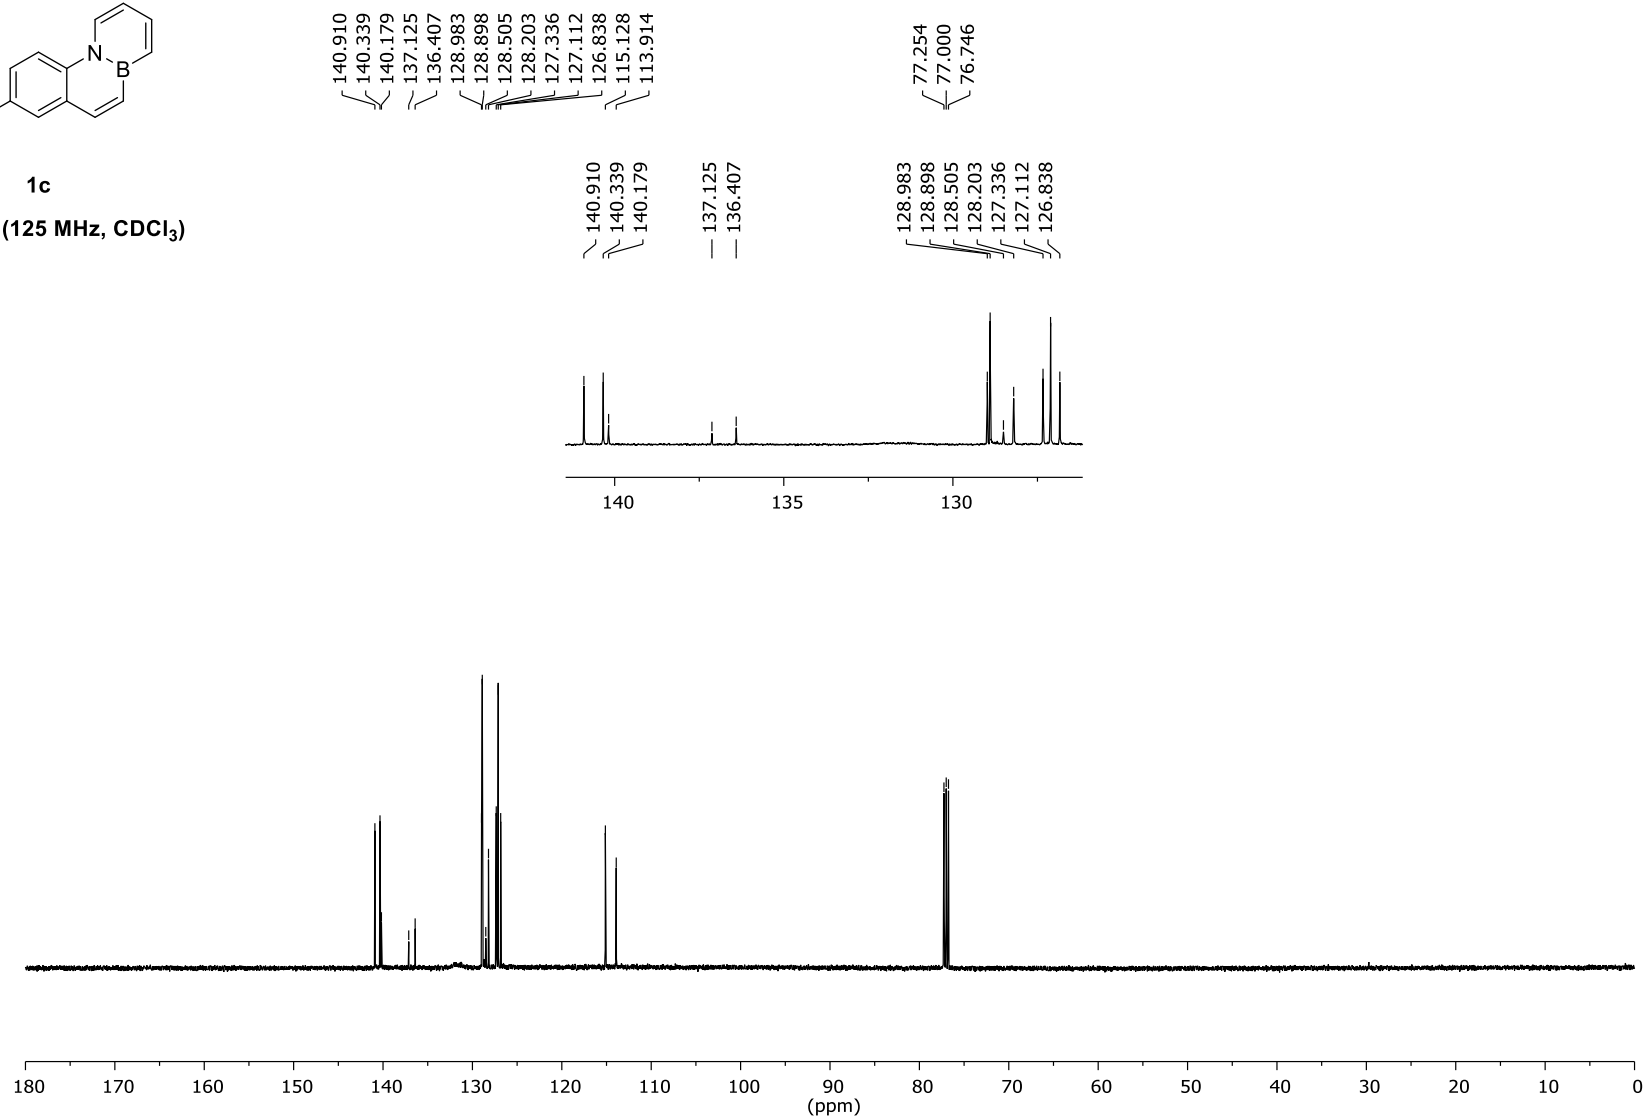

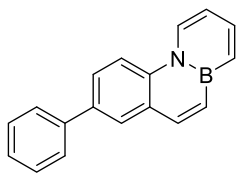

**1c**

**$^{11}\text{B}$ -NMR (160 MHz,  $\text{CDCl}_3$ )**

— 28.819

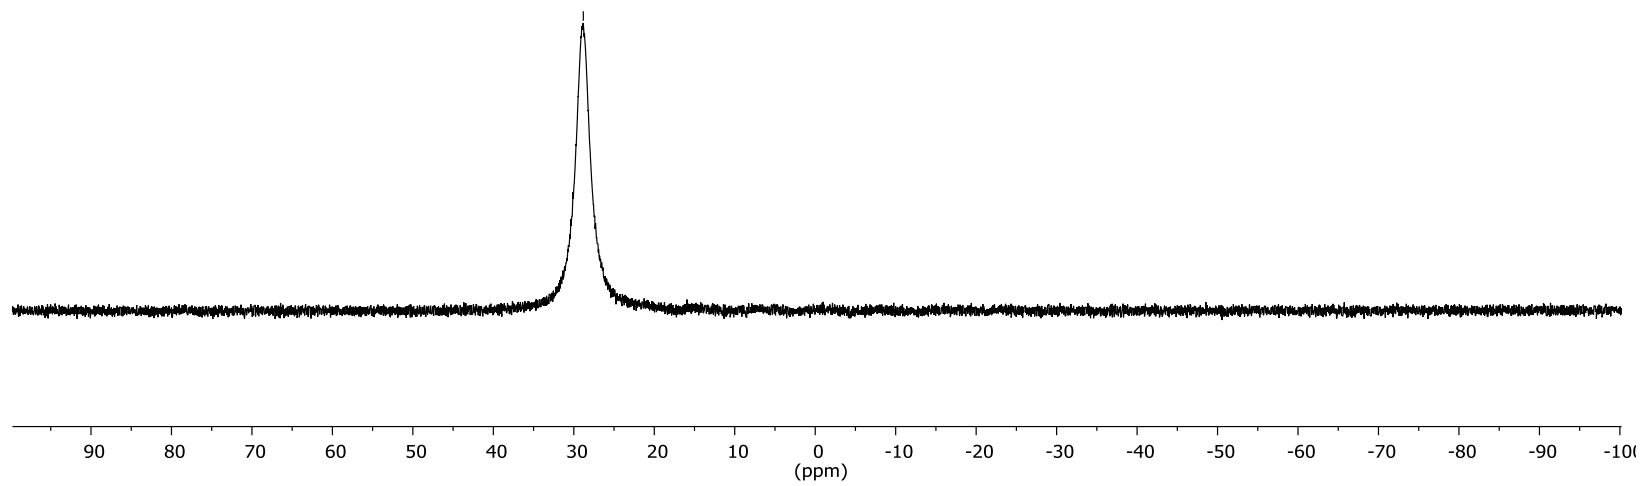

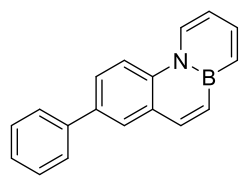

1c

gCOSY-NMR (CDCl<sub>3</sub>)

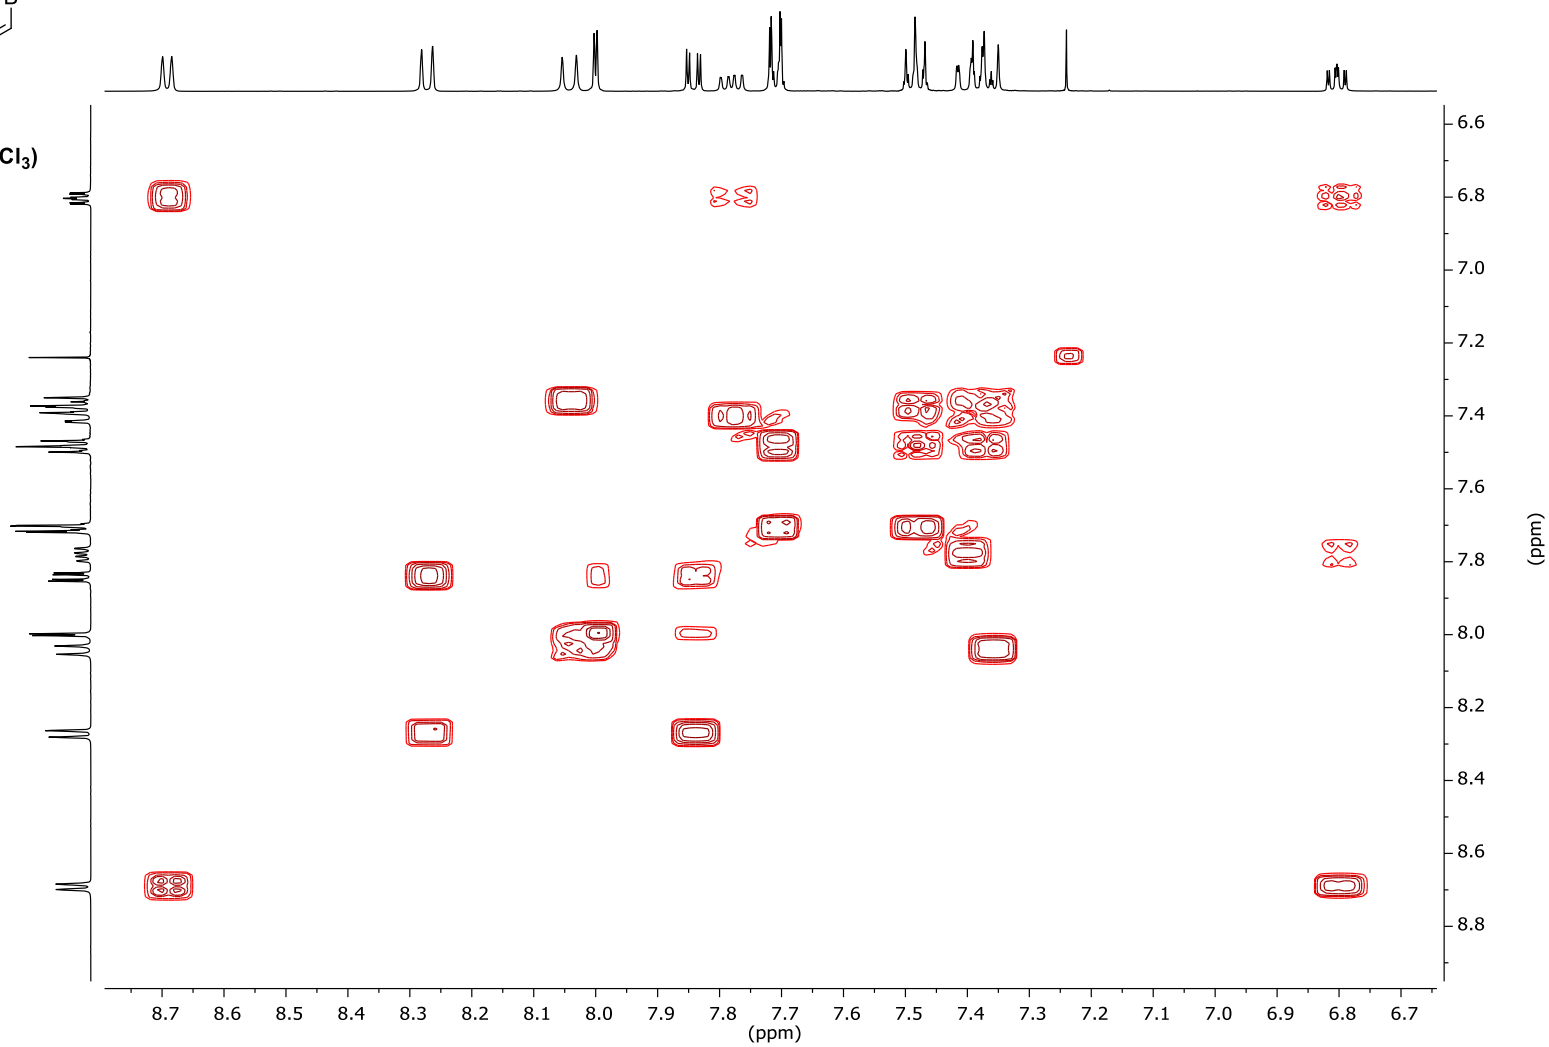



1c

TOCSY-NMR (CDCl<sub>3</sub>)

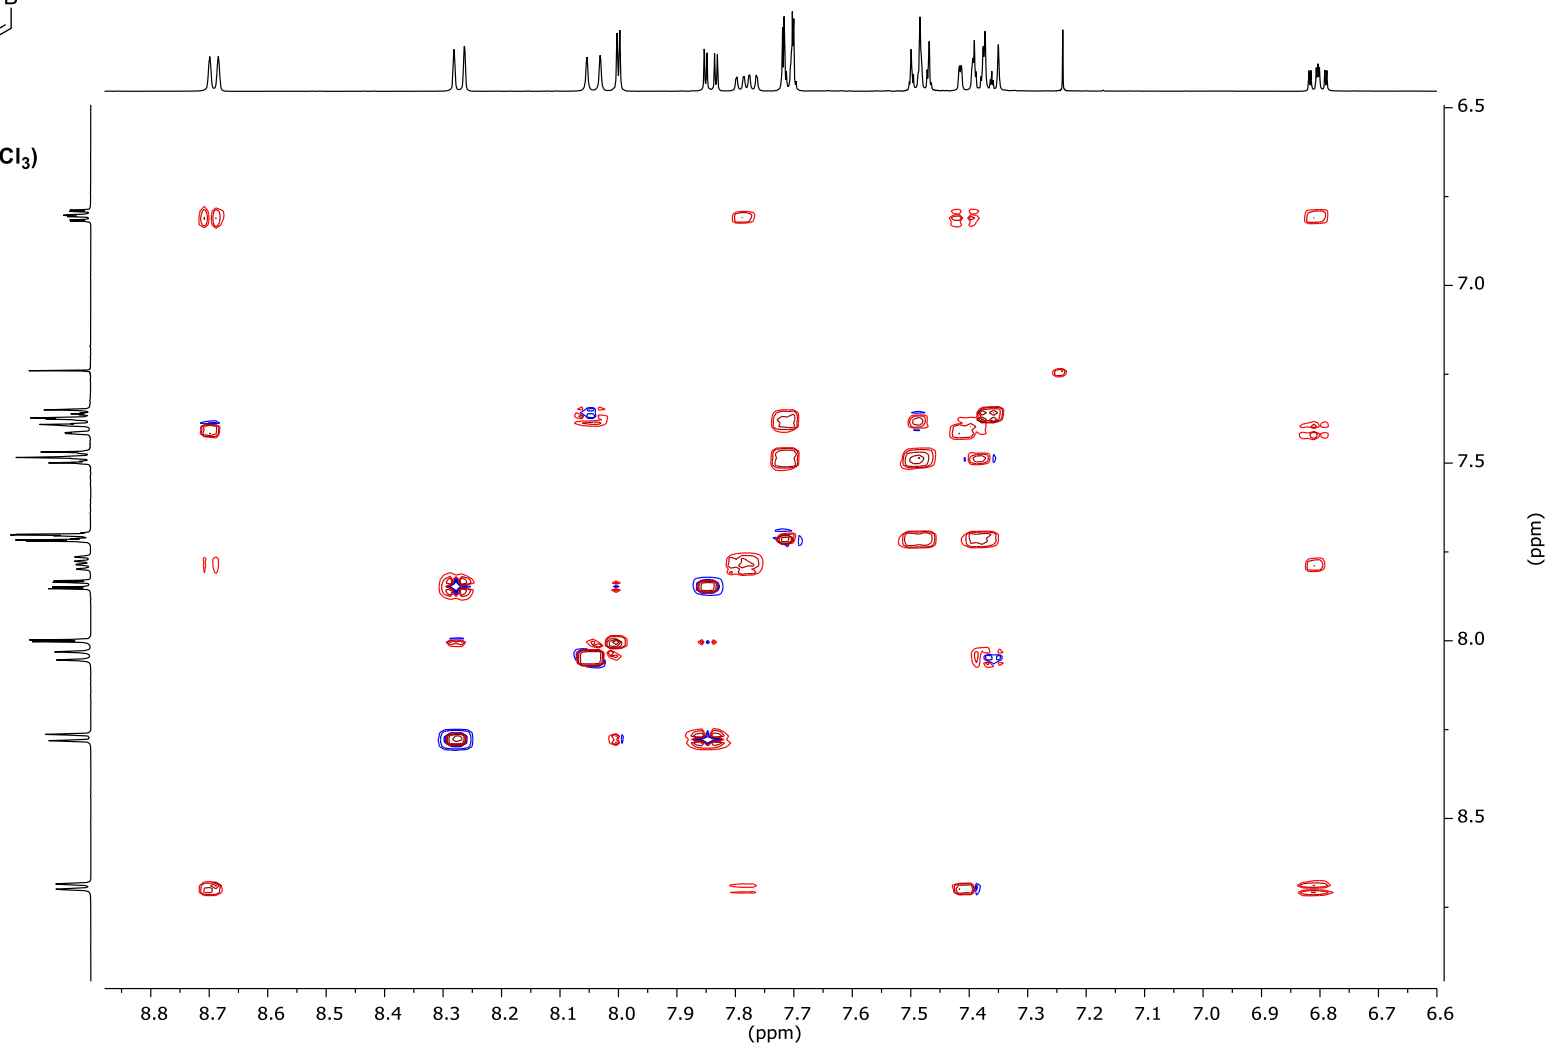

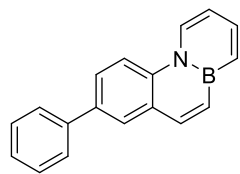

**1c**

gHSQC-NMR (CDCl<sub>3</sub>)

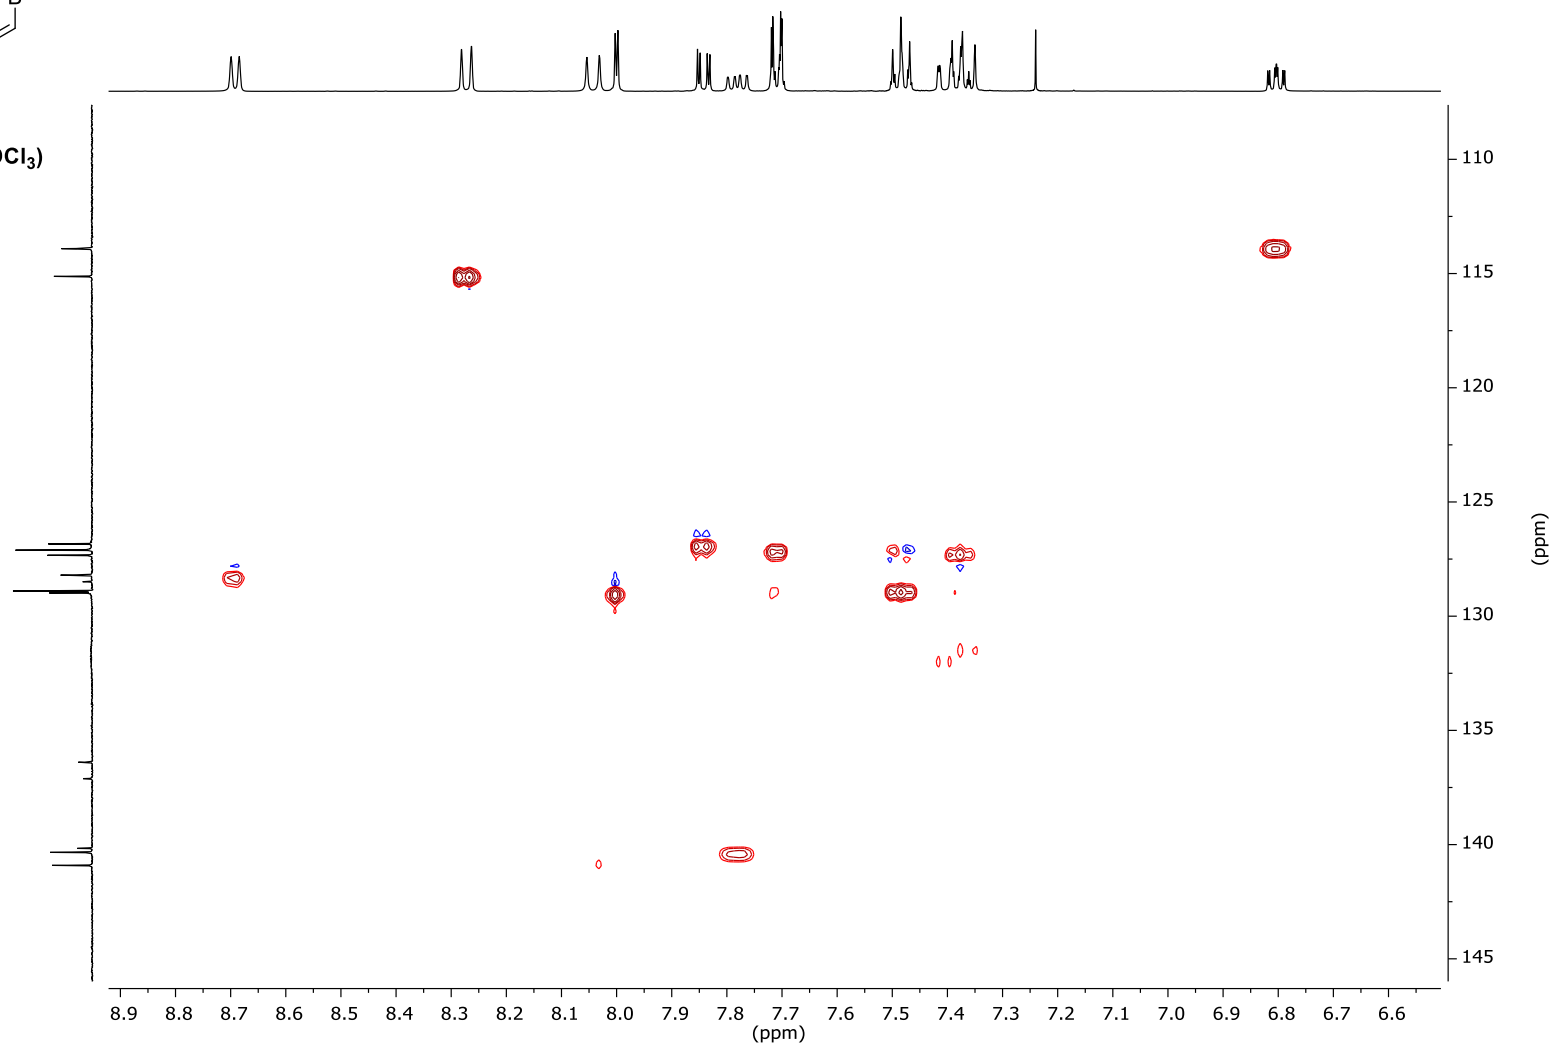



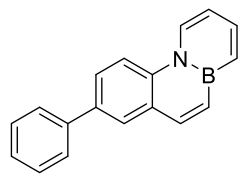

**1c**

gHMBC-NMR (CDCl<sub>3</sub>)

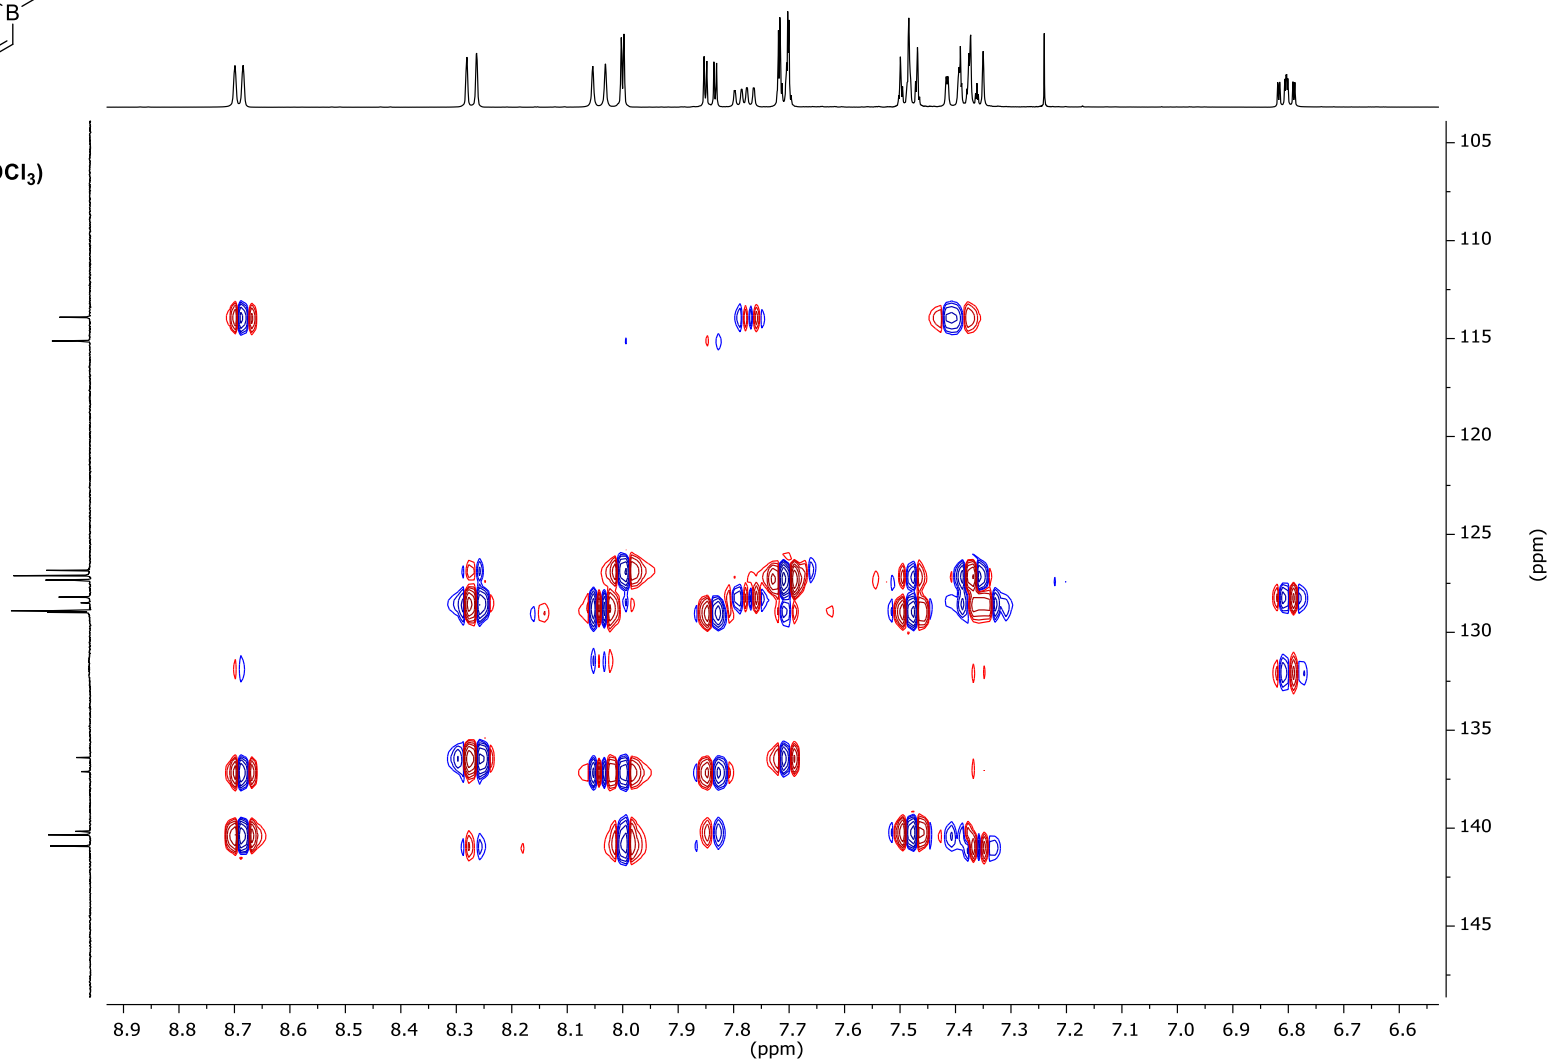

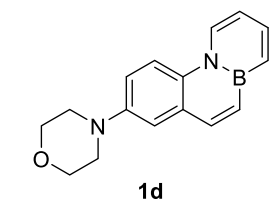

<sup>1</sup>H-NMR (500 MHz, CDCl<sub>3</sub>)

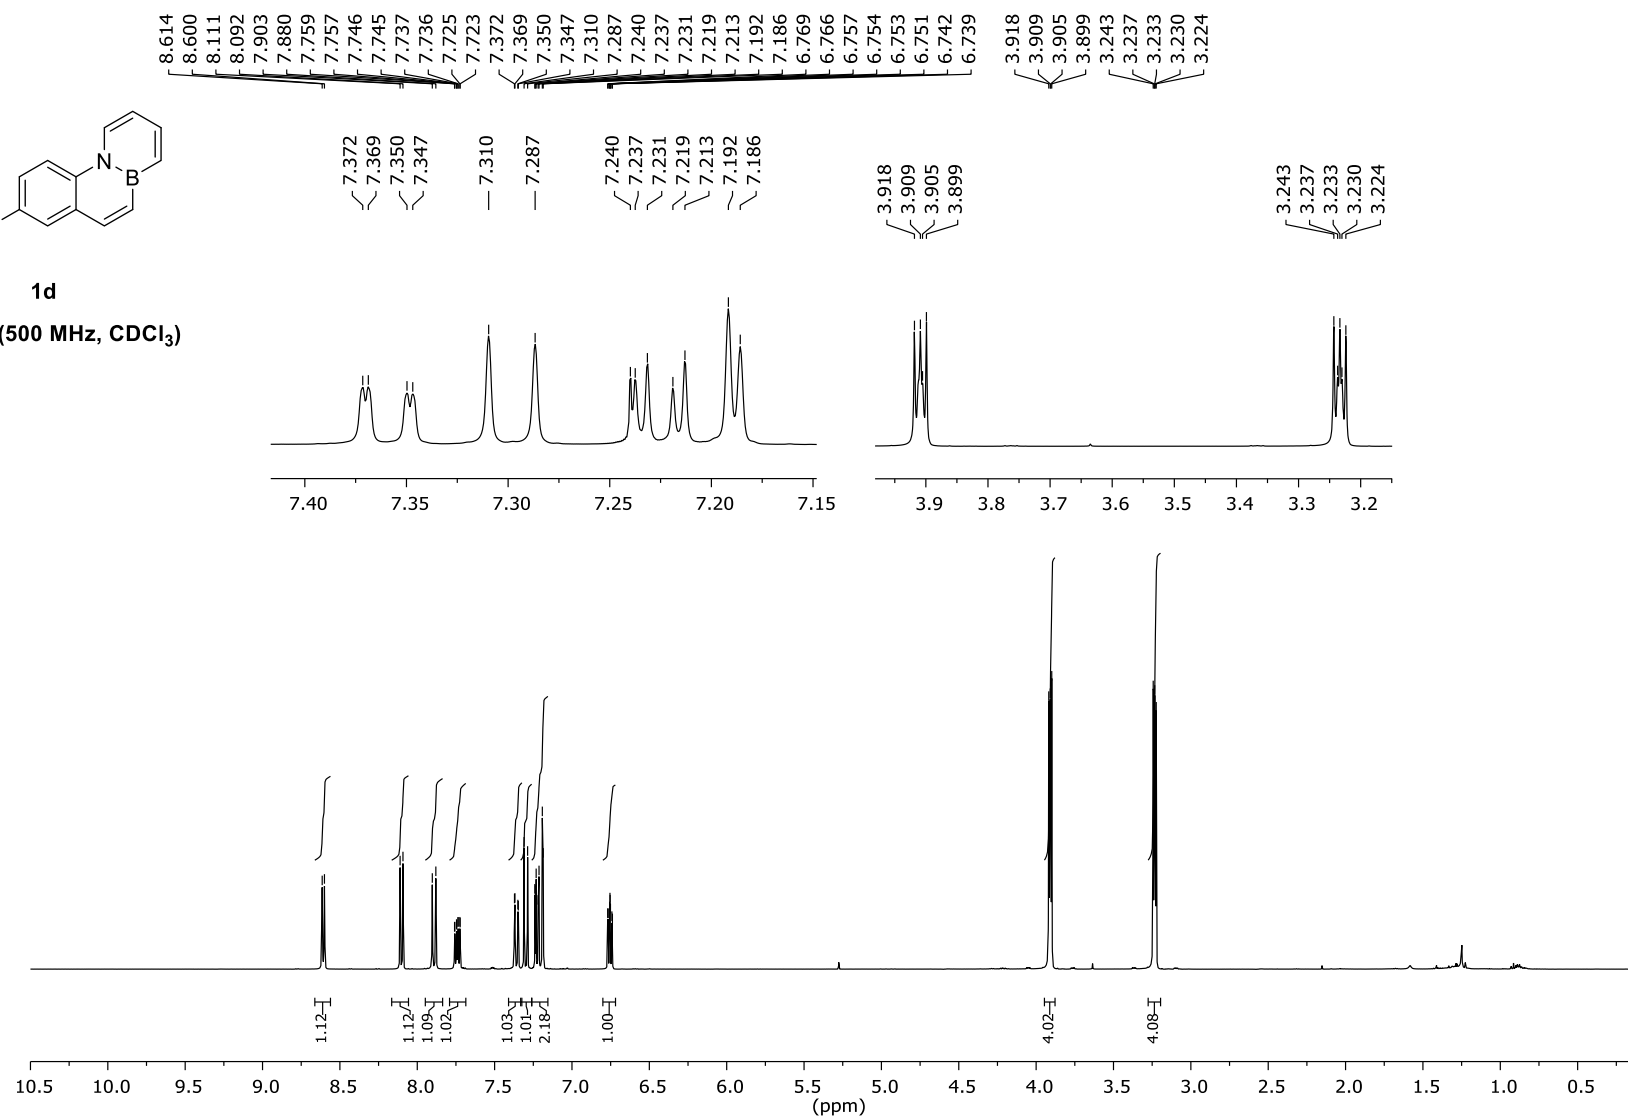

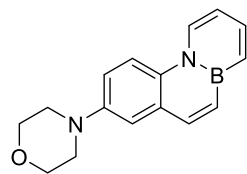

**1d**

$^{13}\text{C}$ -NMR (125 MHz,  $\text{CDCl}_3$ )

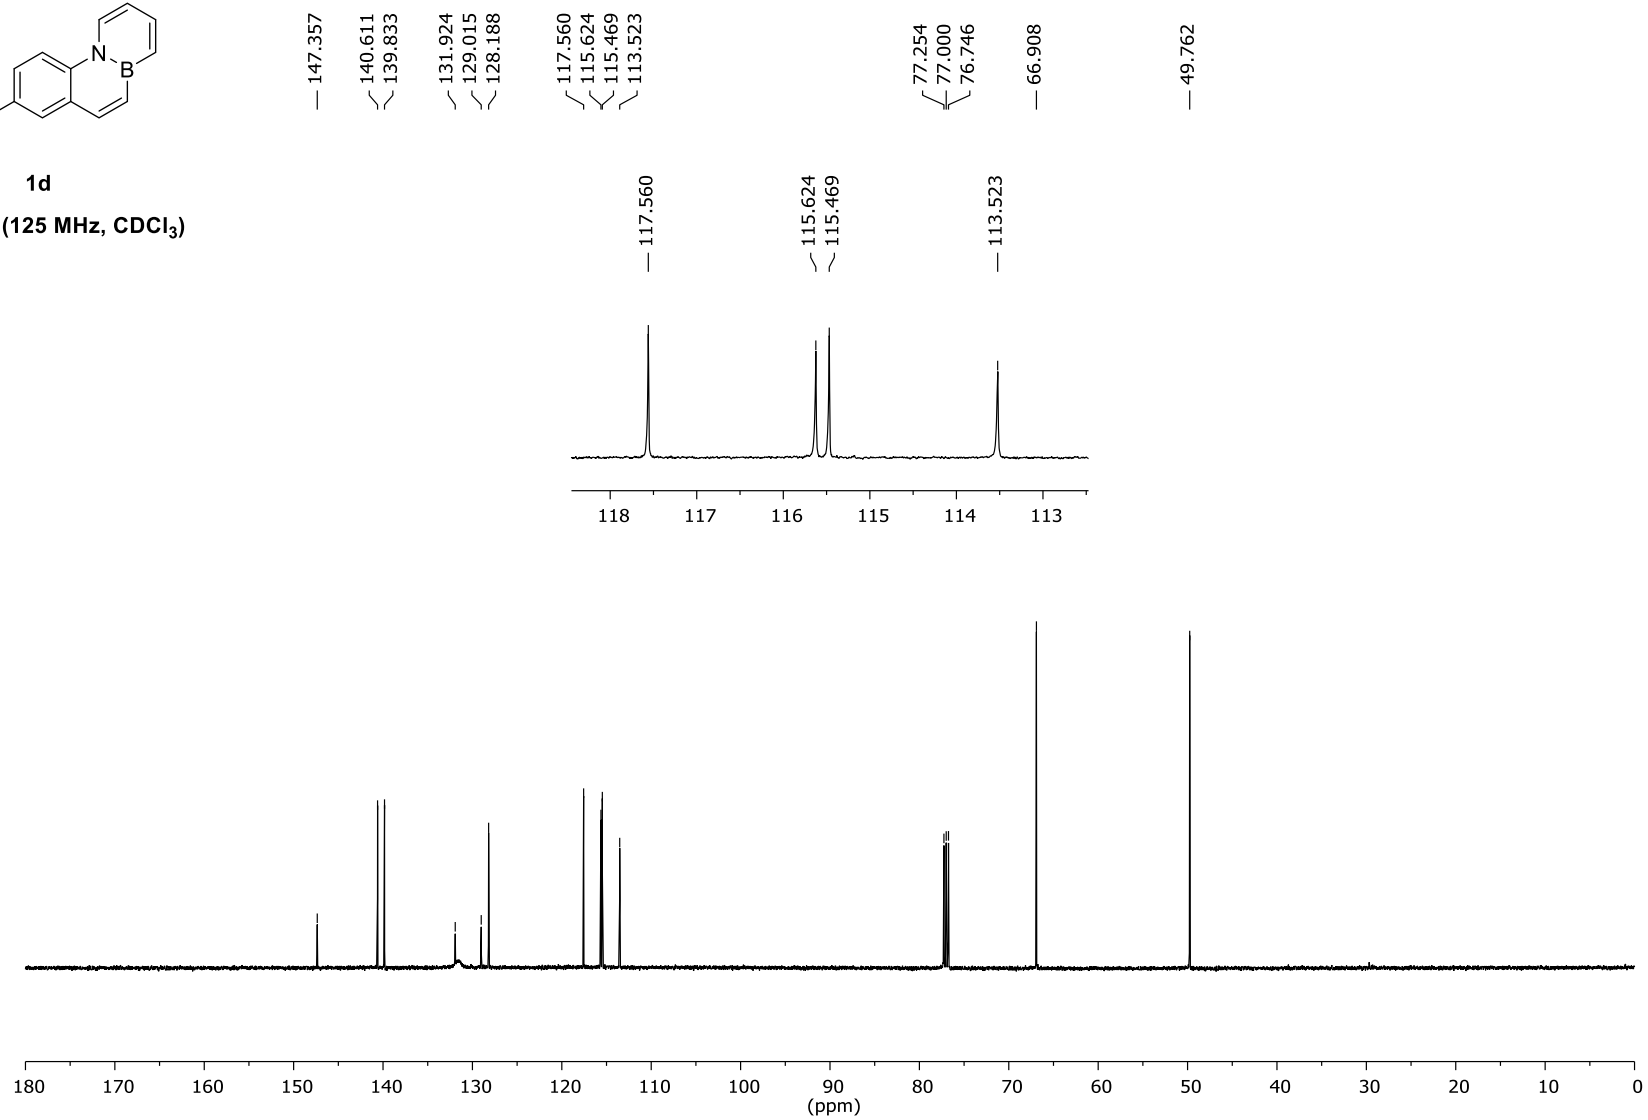

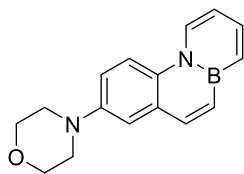

**1d**

**$^{11}\text{B}$ -NMR (160 MHz,  $\text{CDCl}_3$ )**

— 28.508

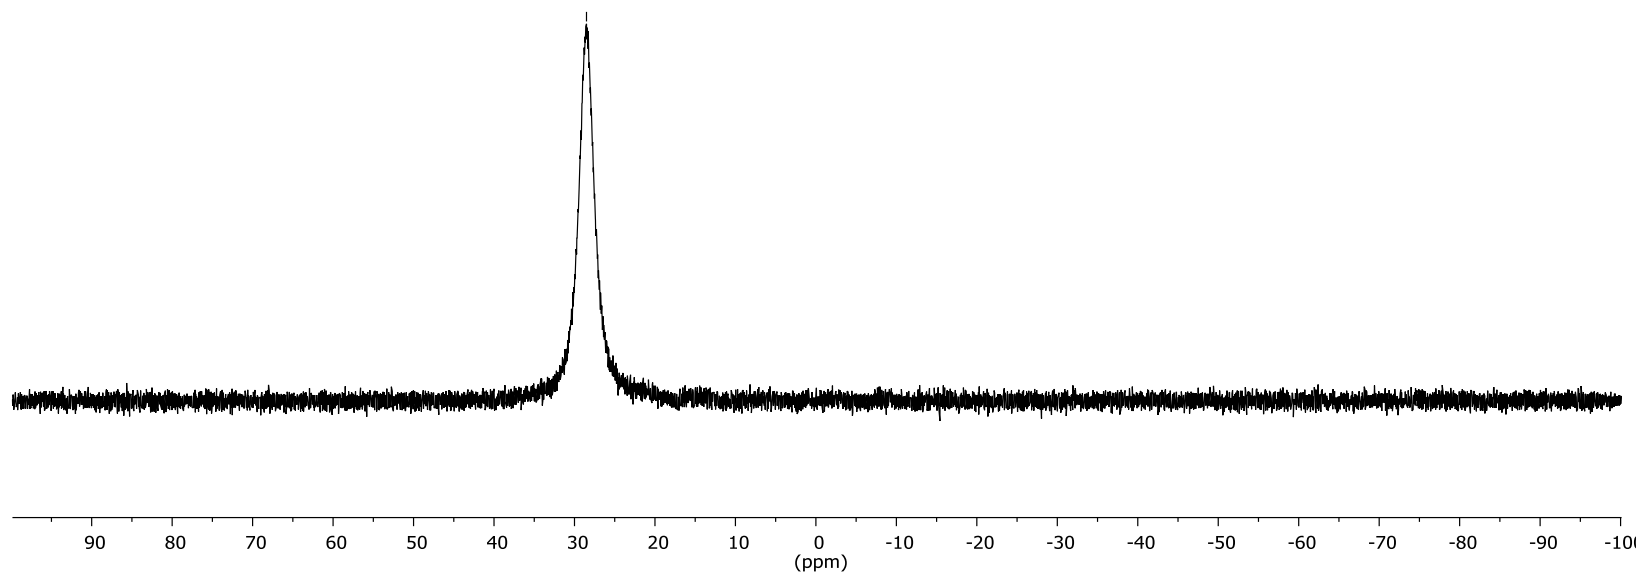

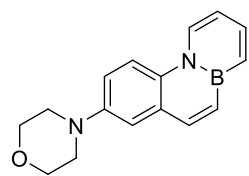

1d

gCOSY-NMR (CDCl<sub>3</sub>)

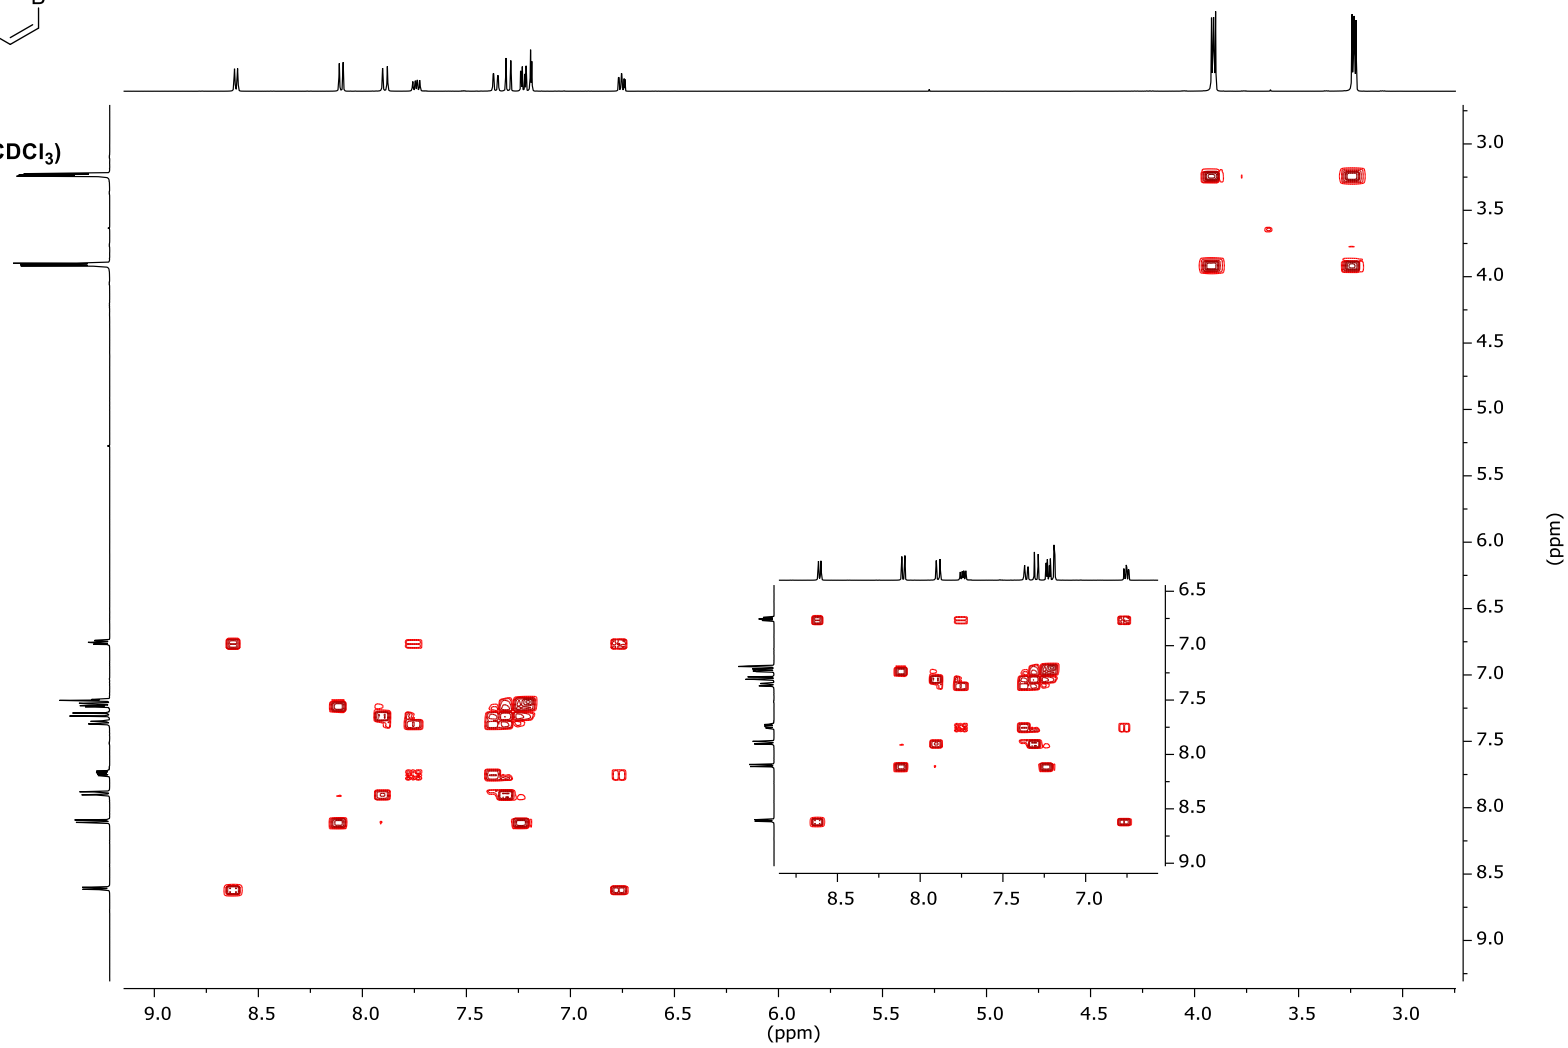



1d

TOCSY-NMR (CDCl<sub>3</sub>)

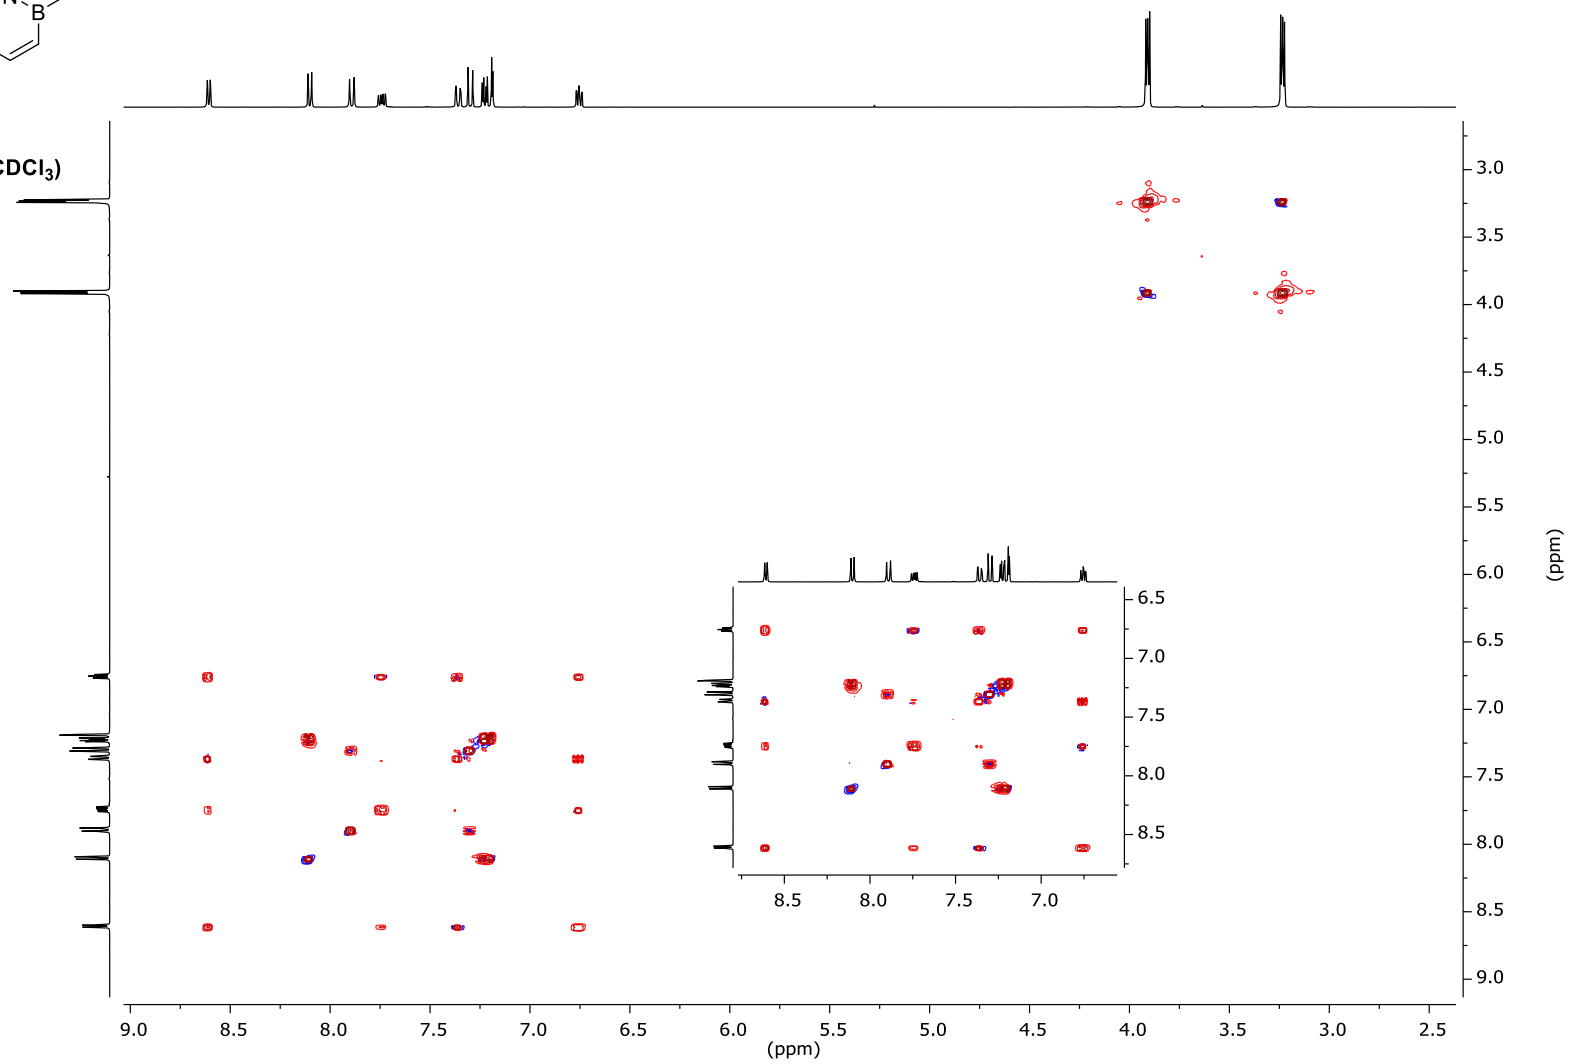

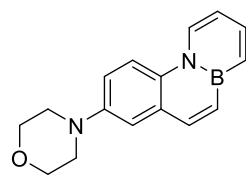

1d

gHSQC-NMR (CDCl<sub>3</sub>)

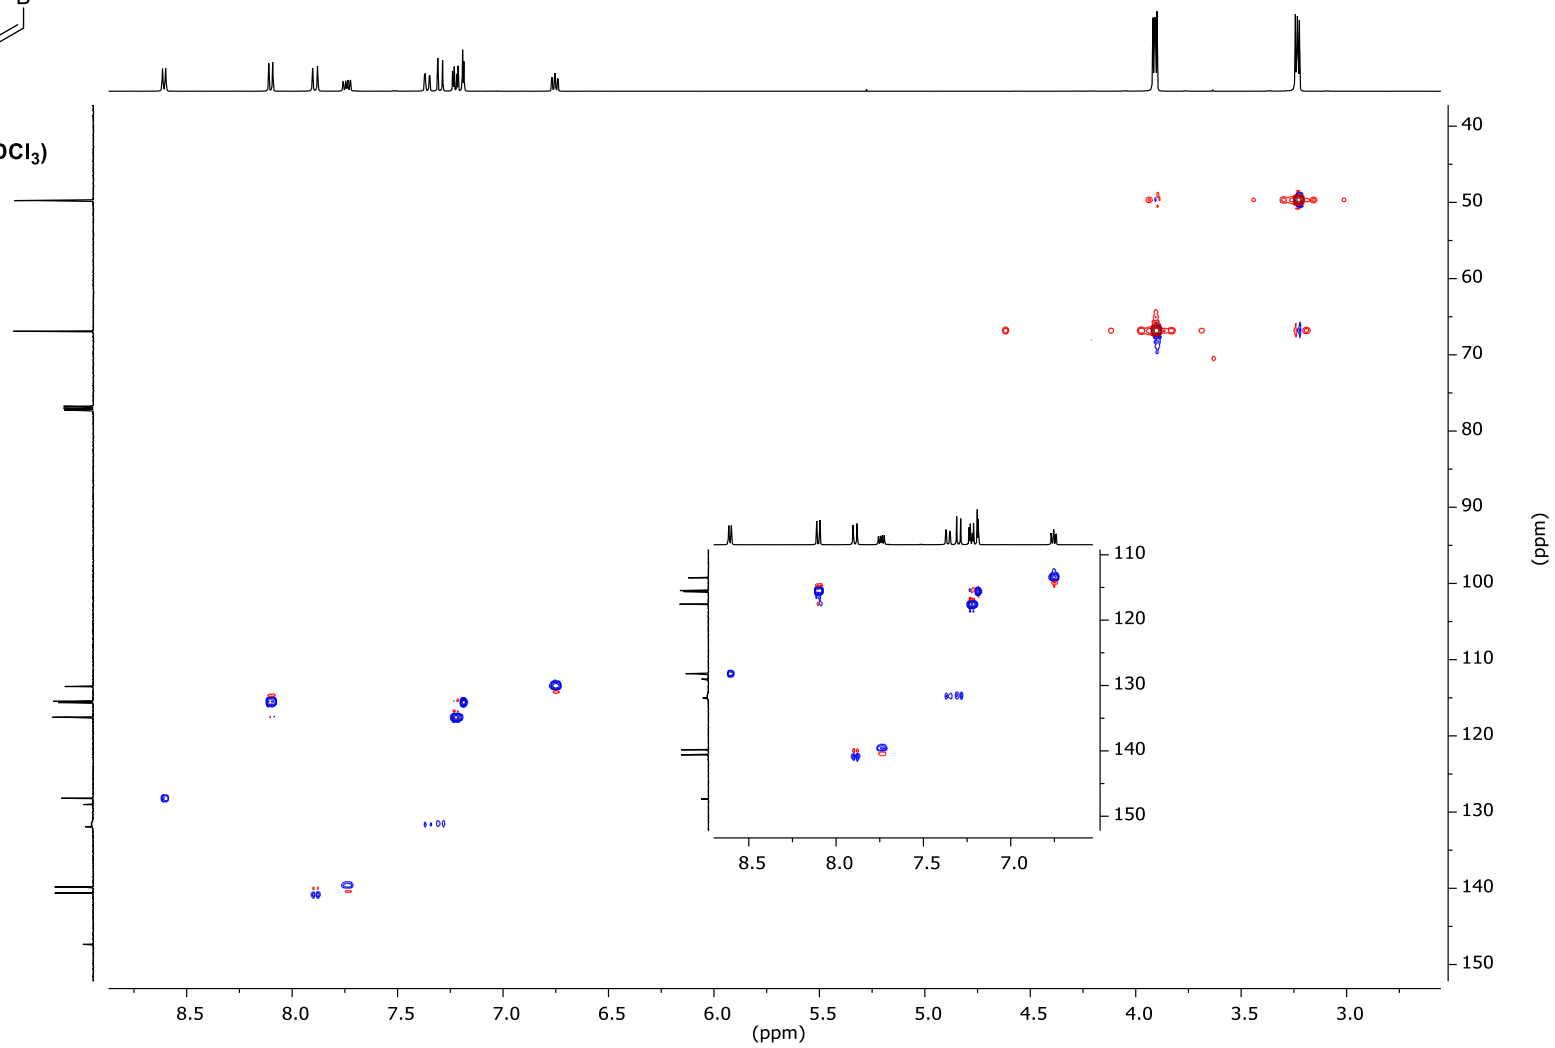



1d

gHMBC-NMR (CDCl<sub>3</sub>)

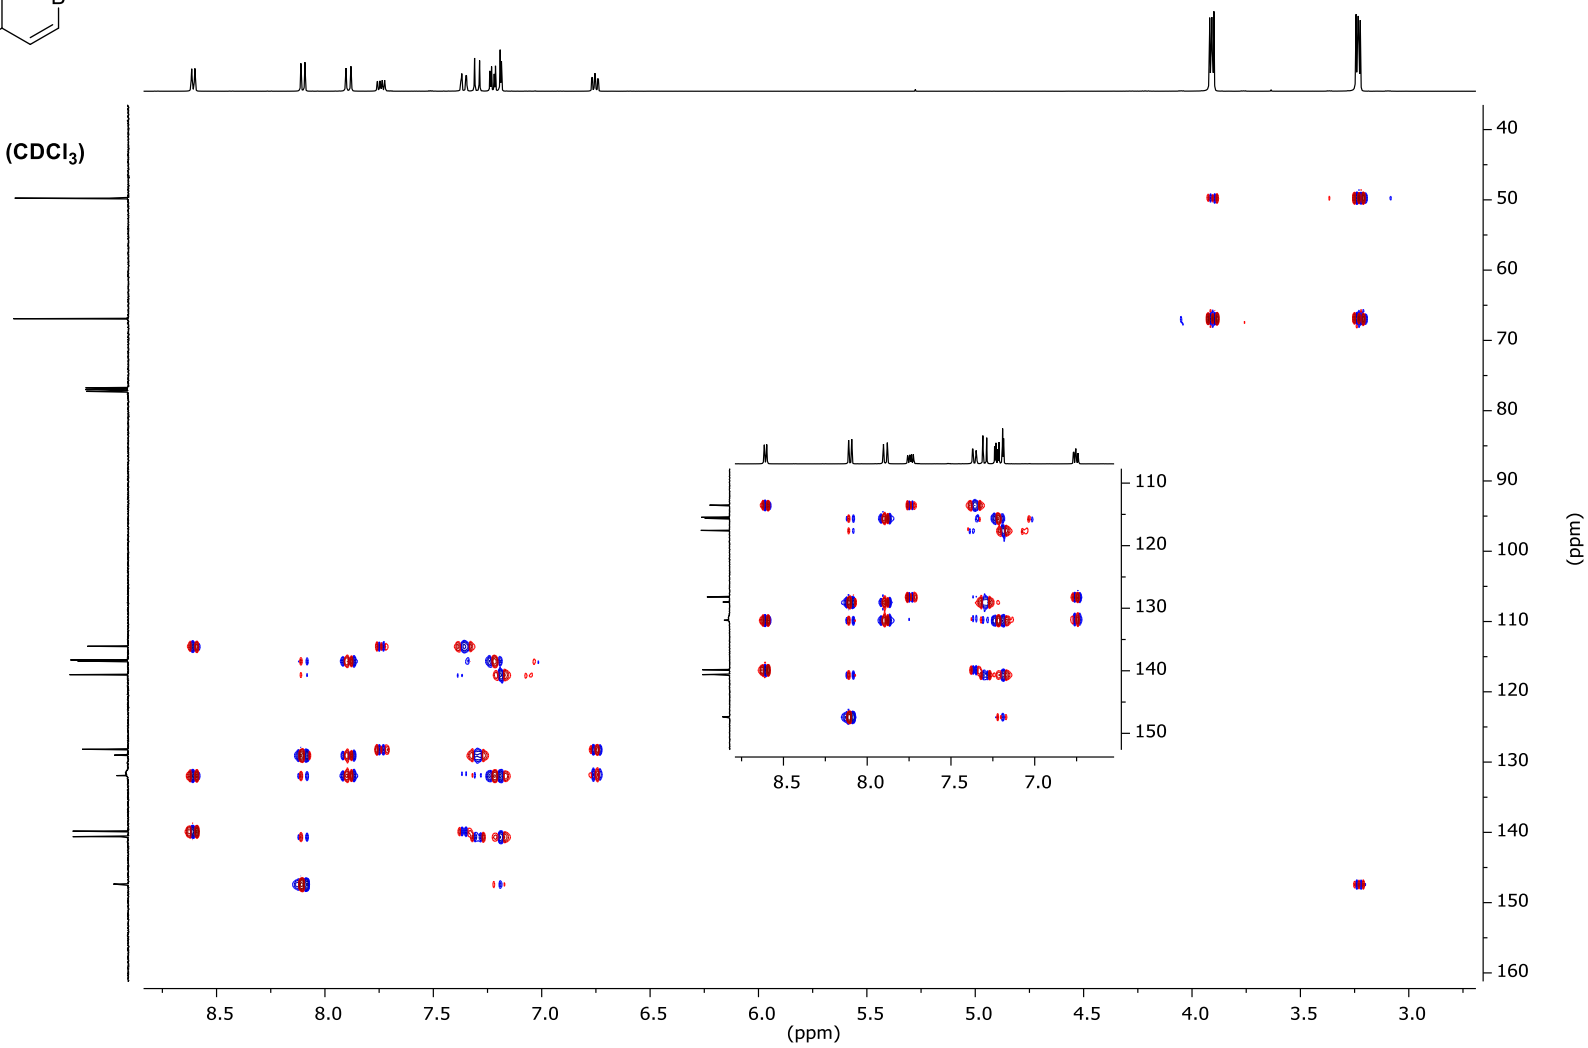



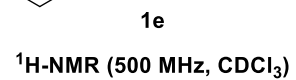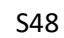

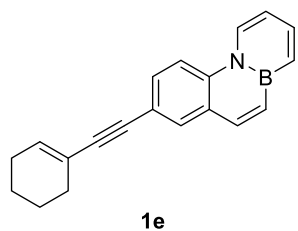

$^{13}\text{C}$ -NMR (125 MHz,  $\text{CDCl}_3$ )

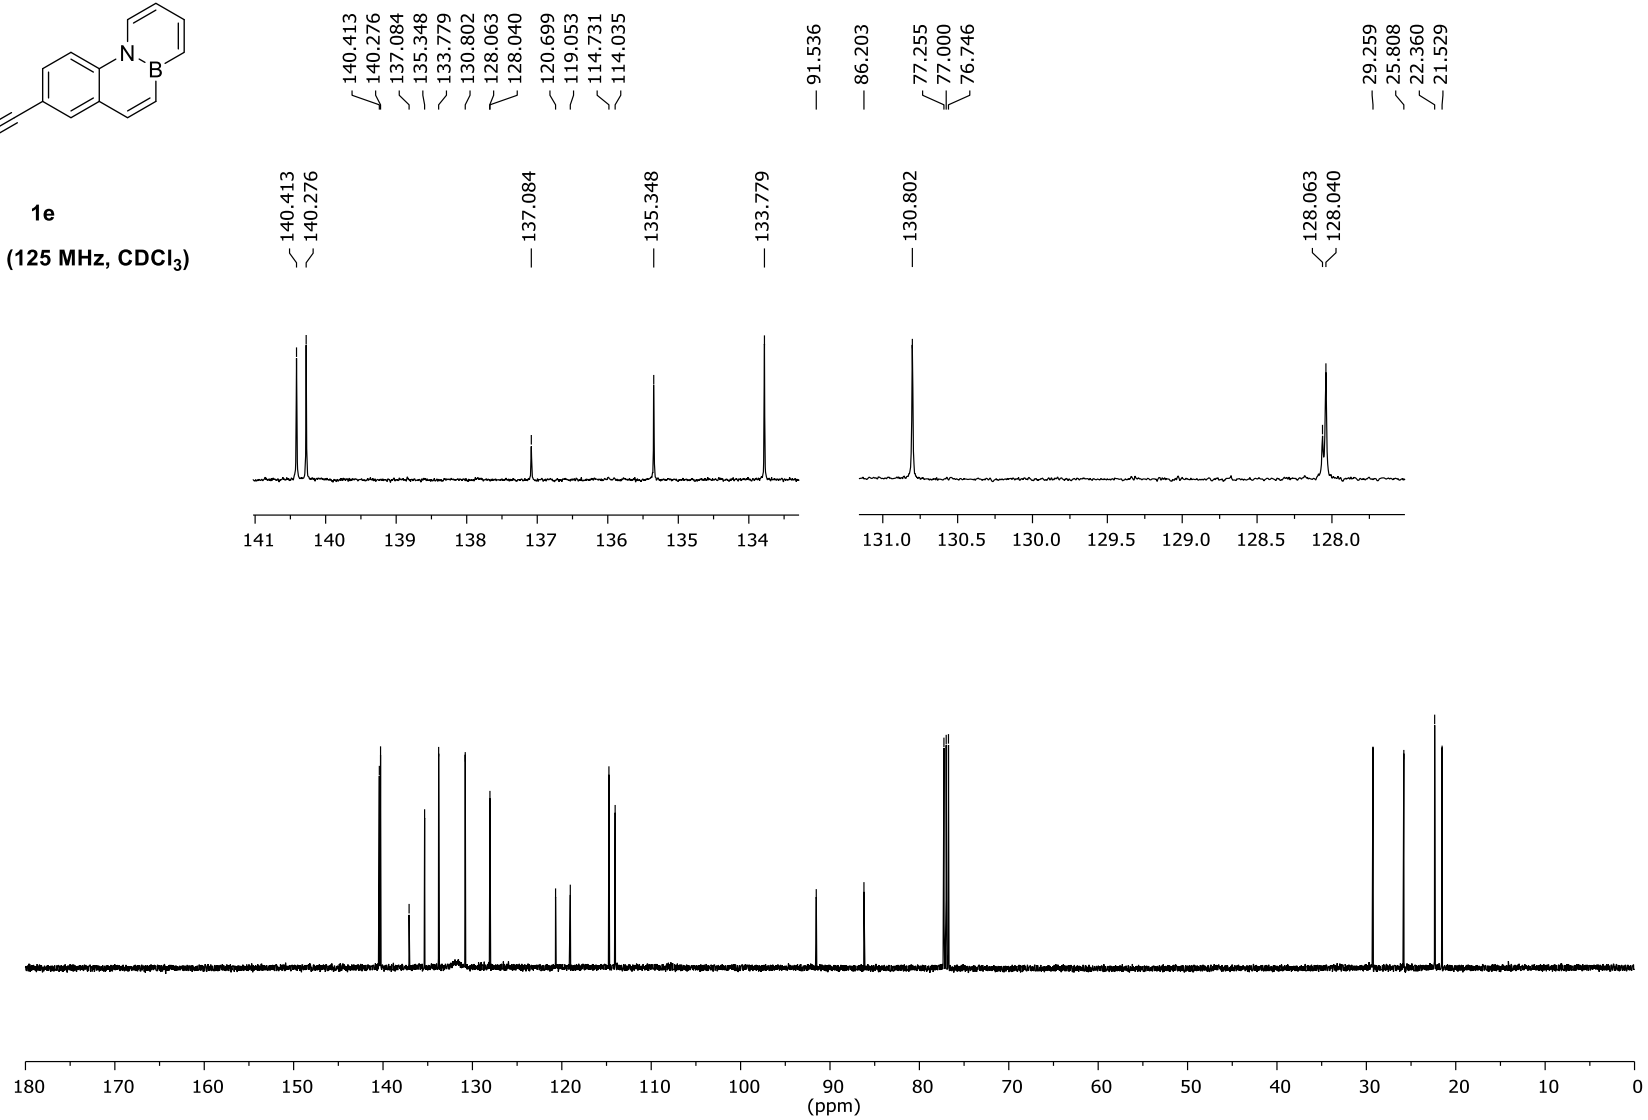

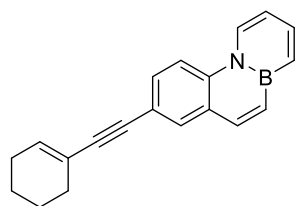

**1e**

**$^{11}\text{B}$ -NMR (160 MHz,  $\text{CDCl}_3$ )**

— 29.008

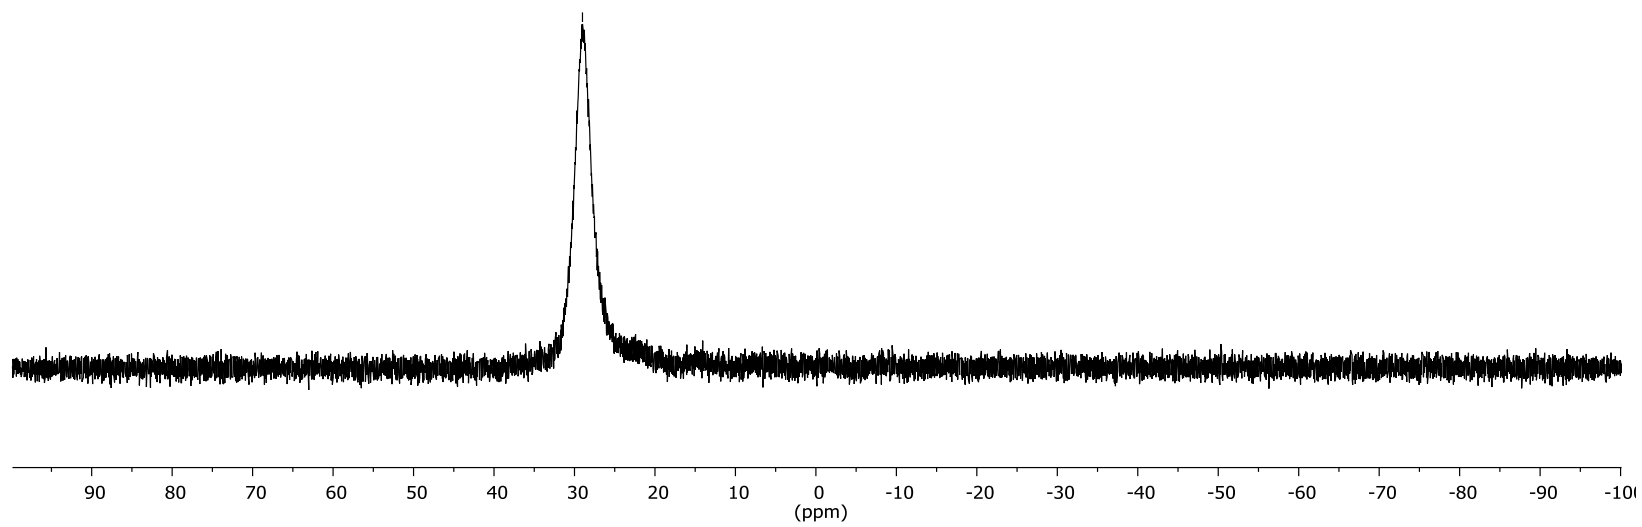

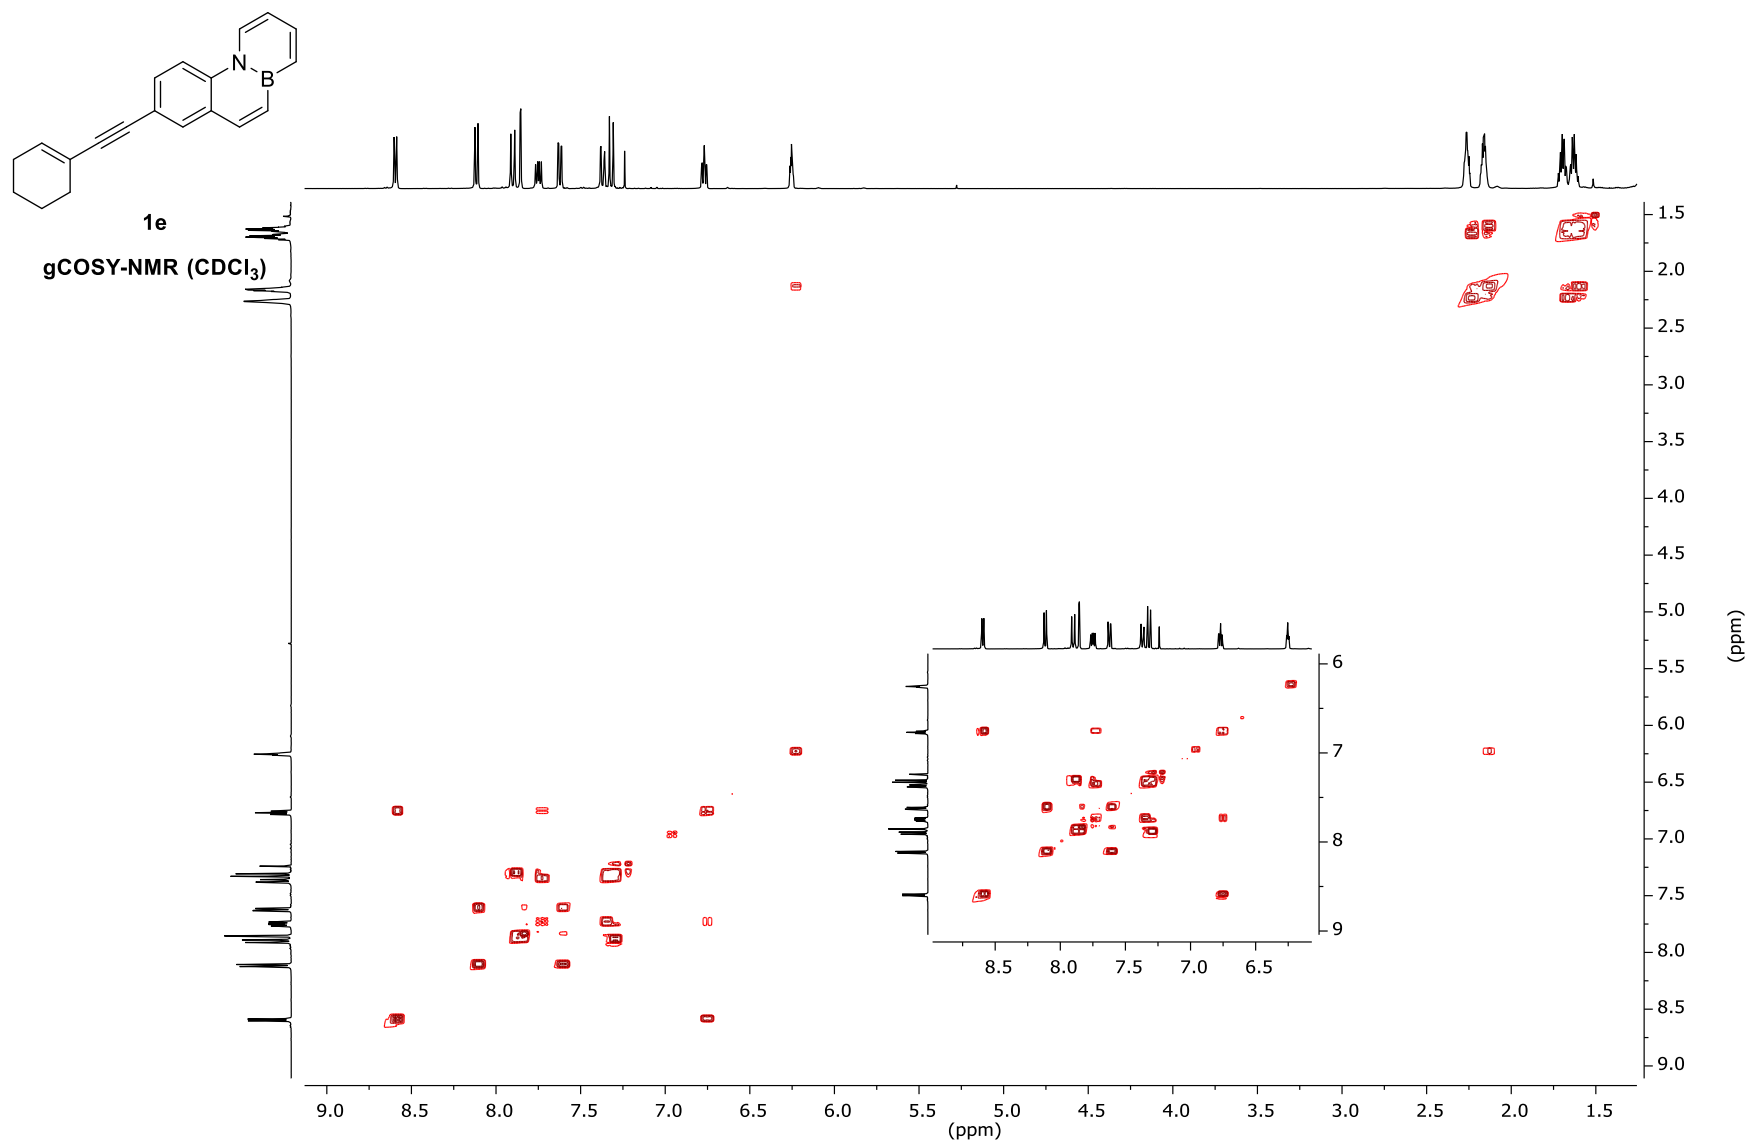

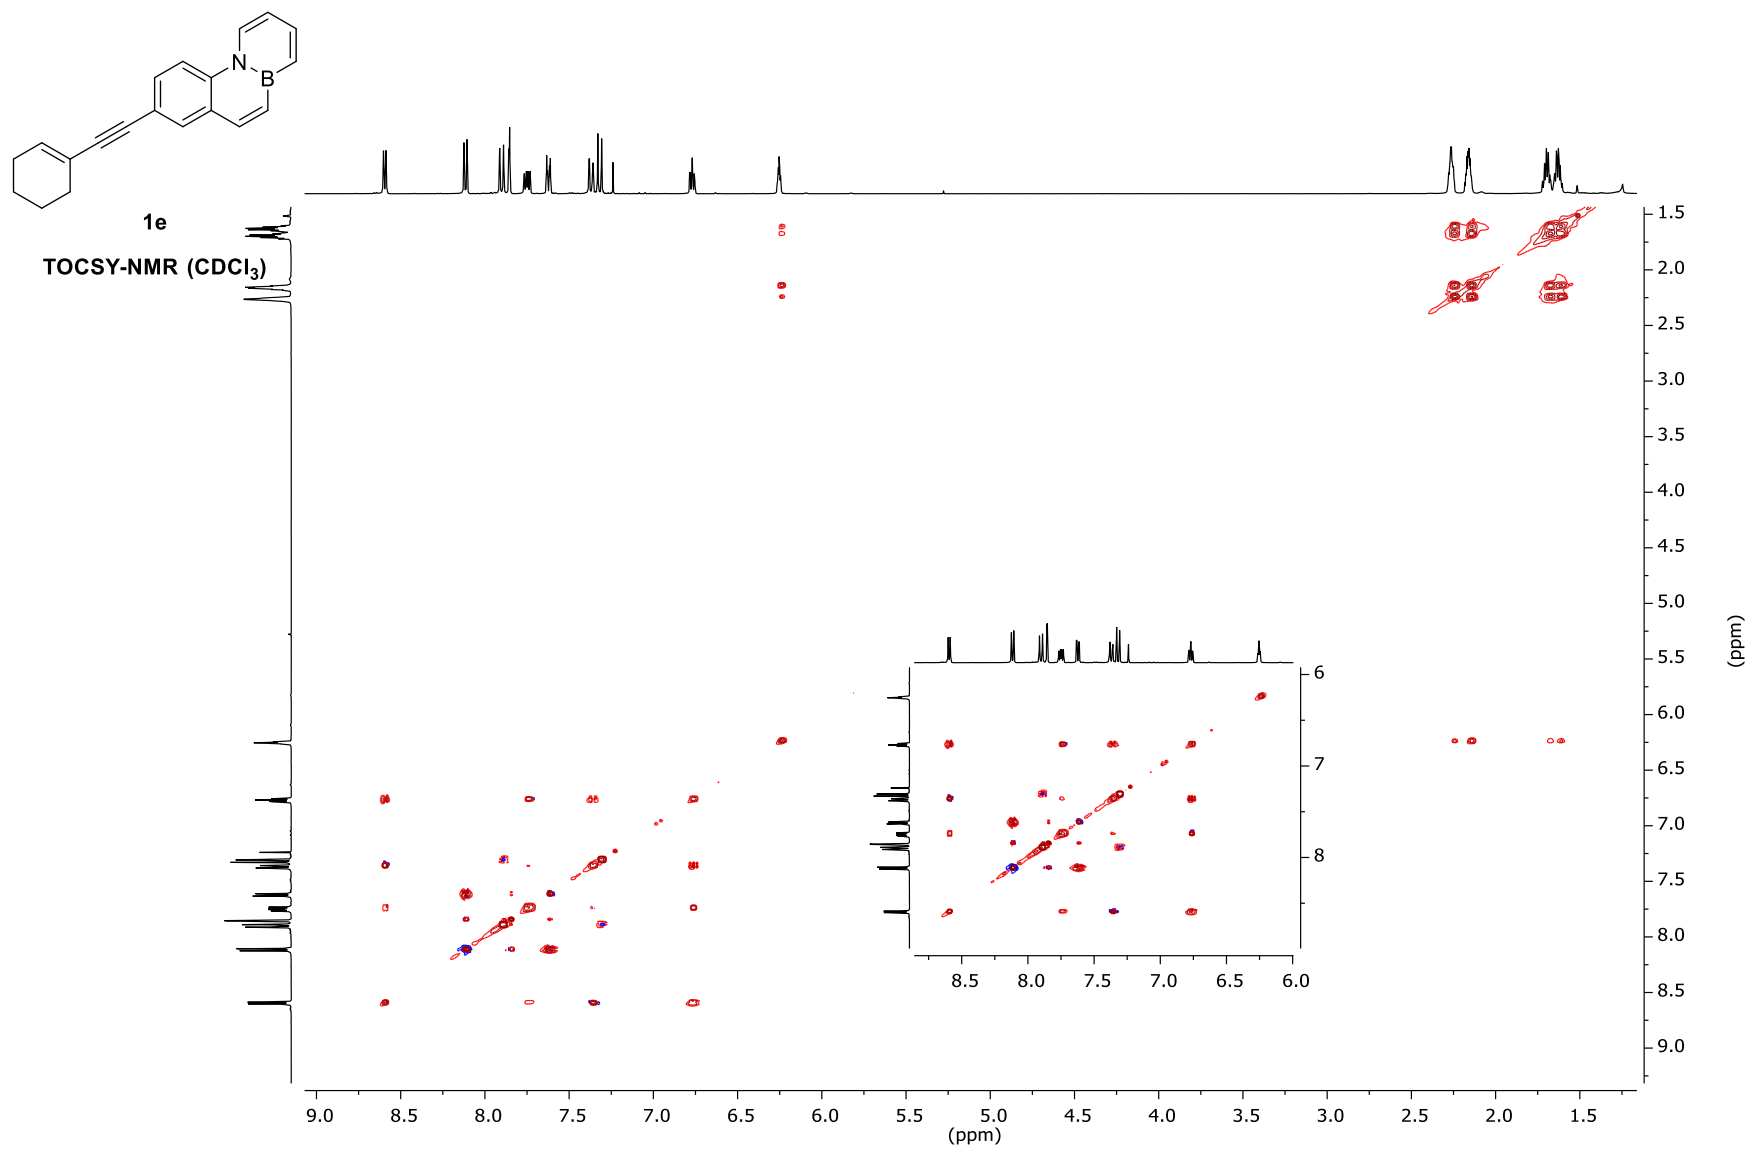

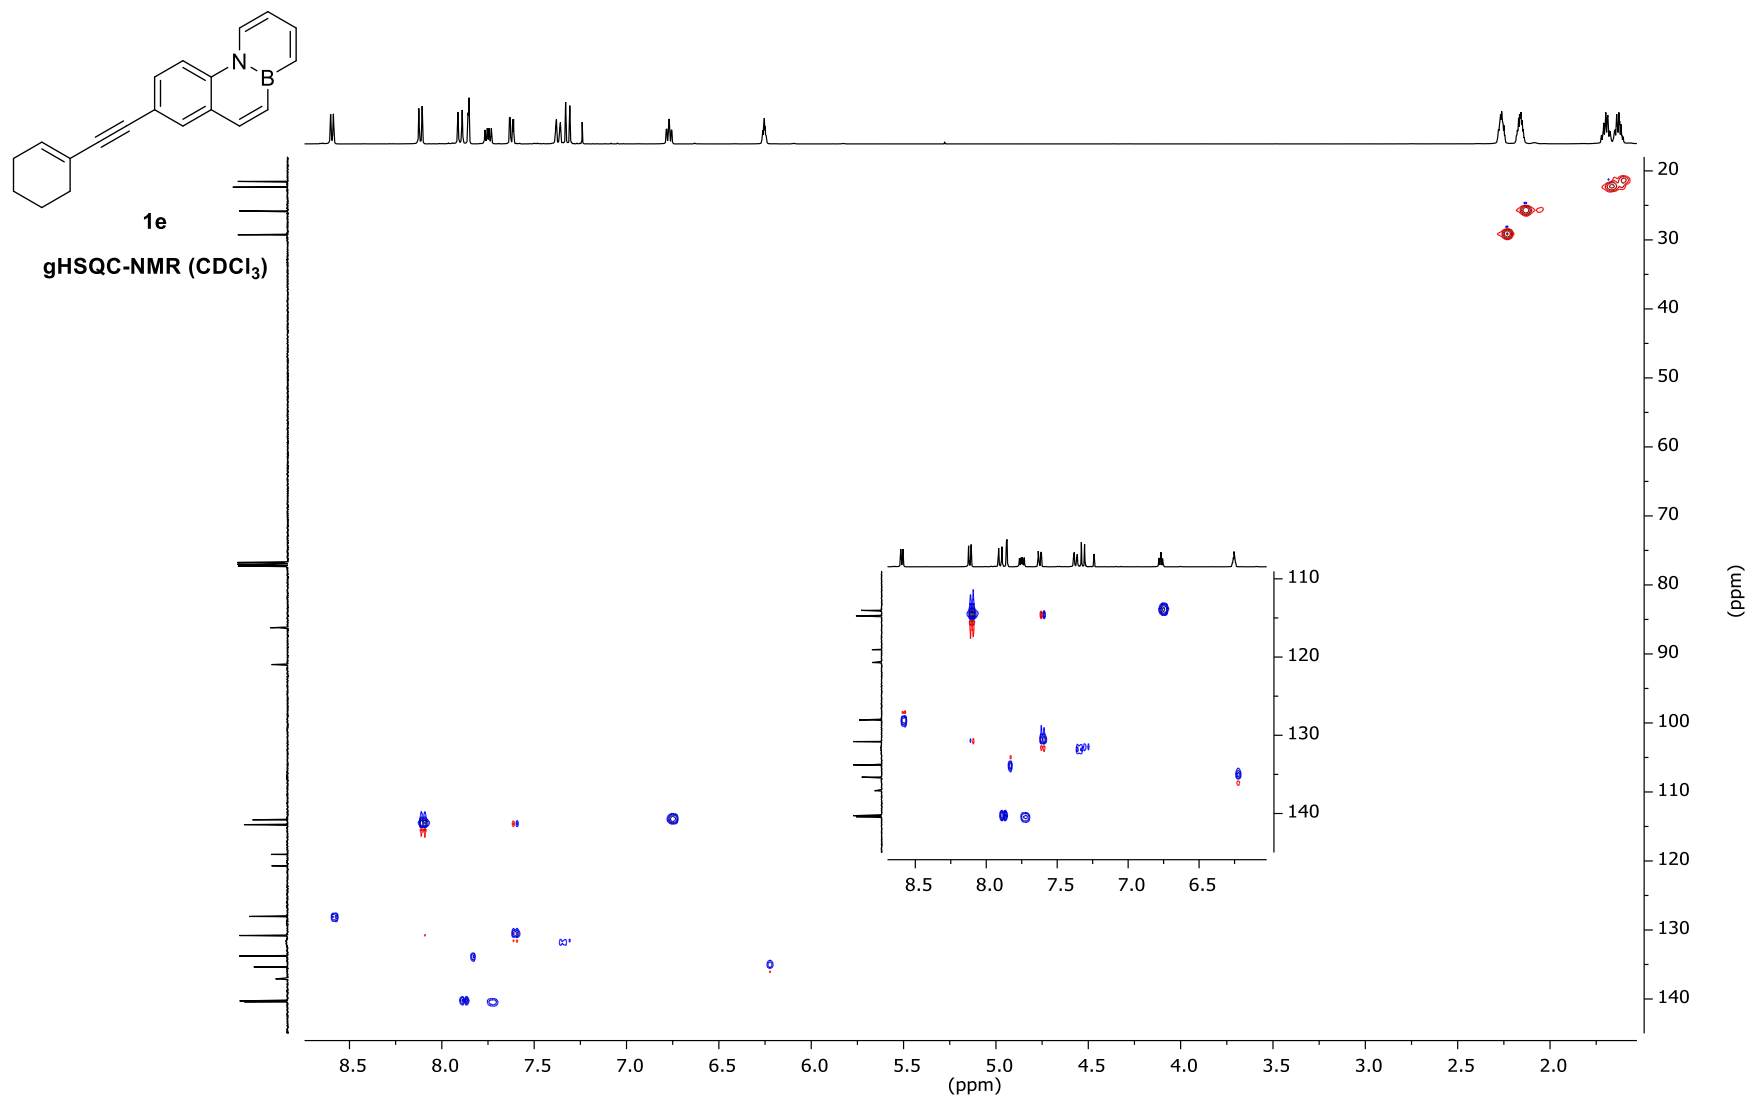

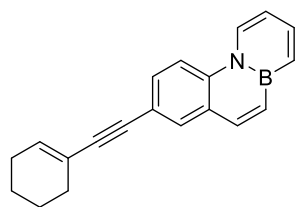

1e

gHMBC-NMR (CDCl<sub>3</sub>)

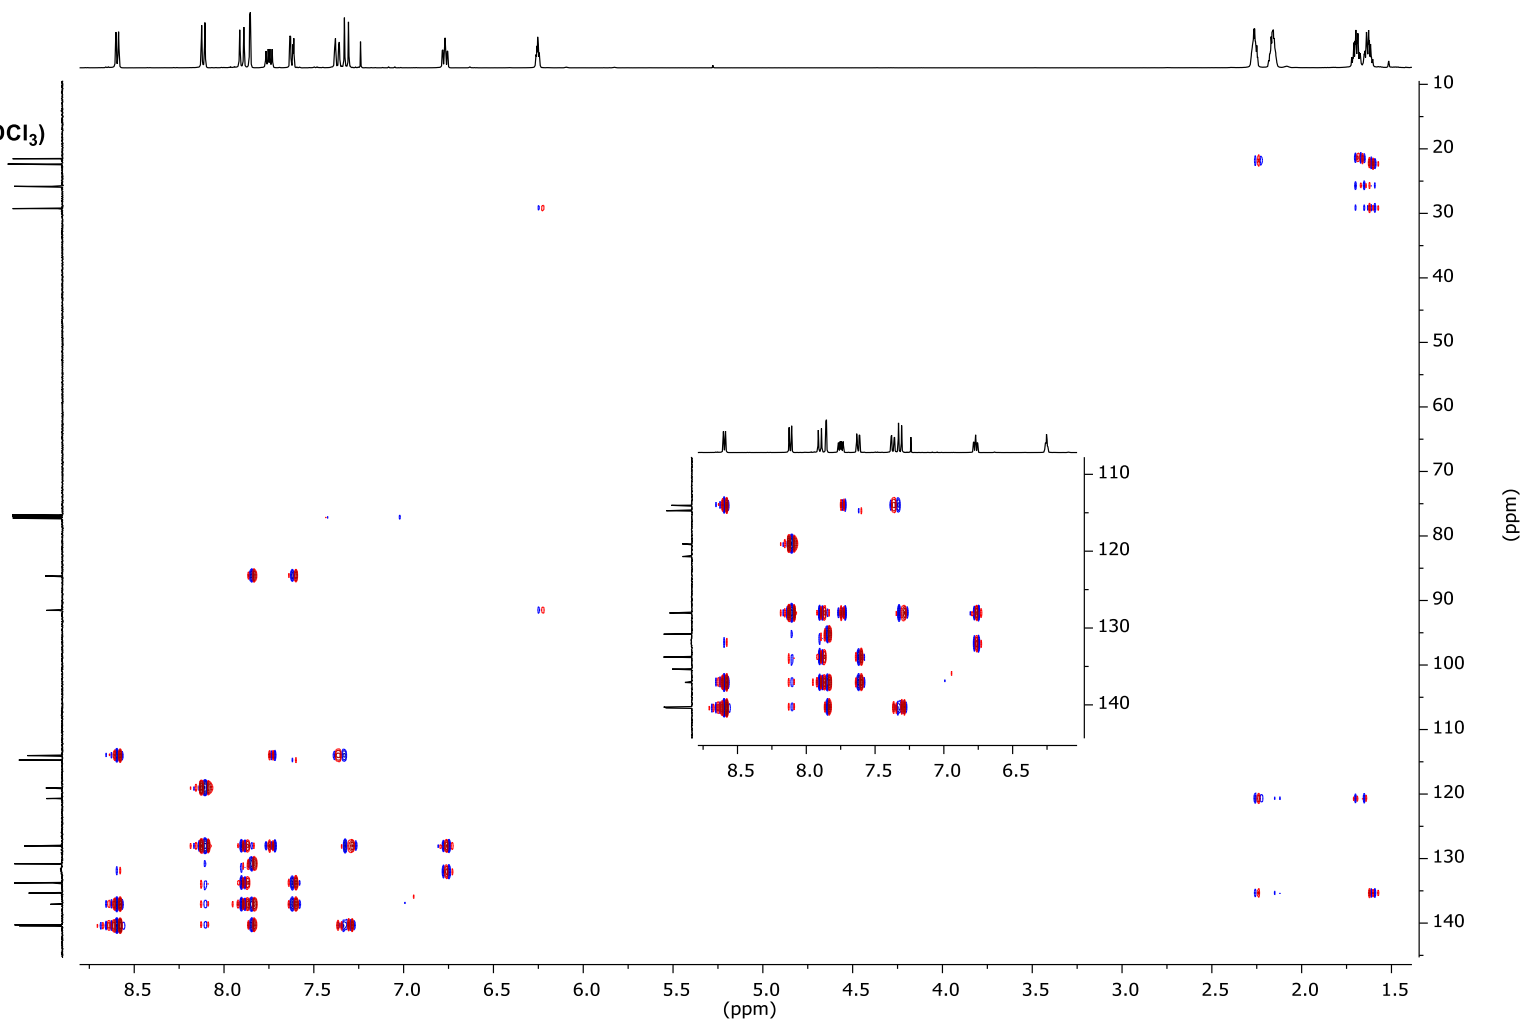

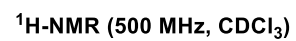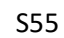



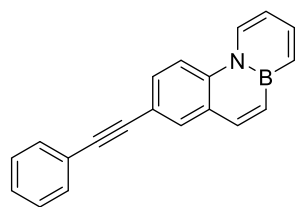

**1f**

$^{13}\text{C}$ -NMR (125 MHz,  $\text{CDCl}_3$ )

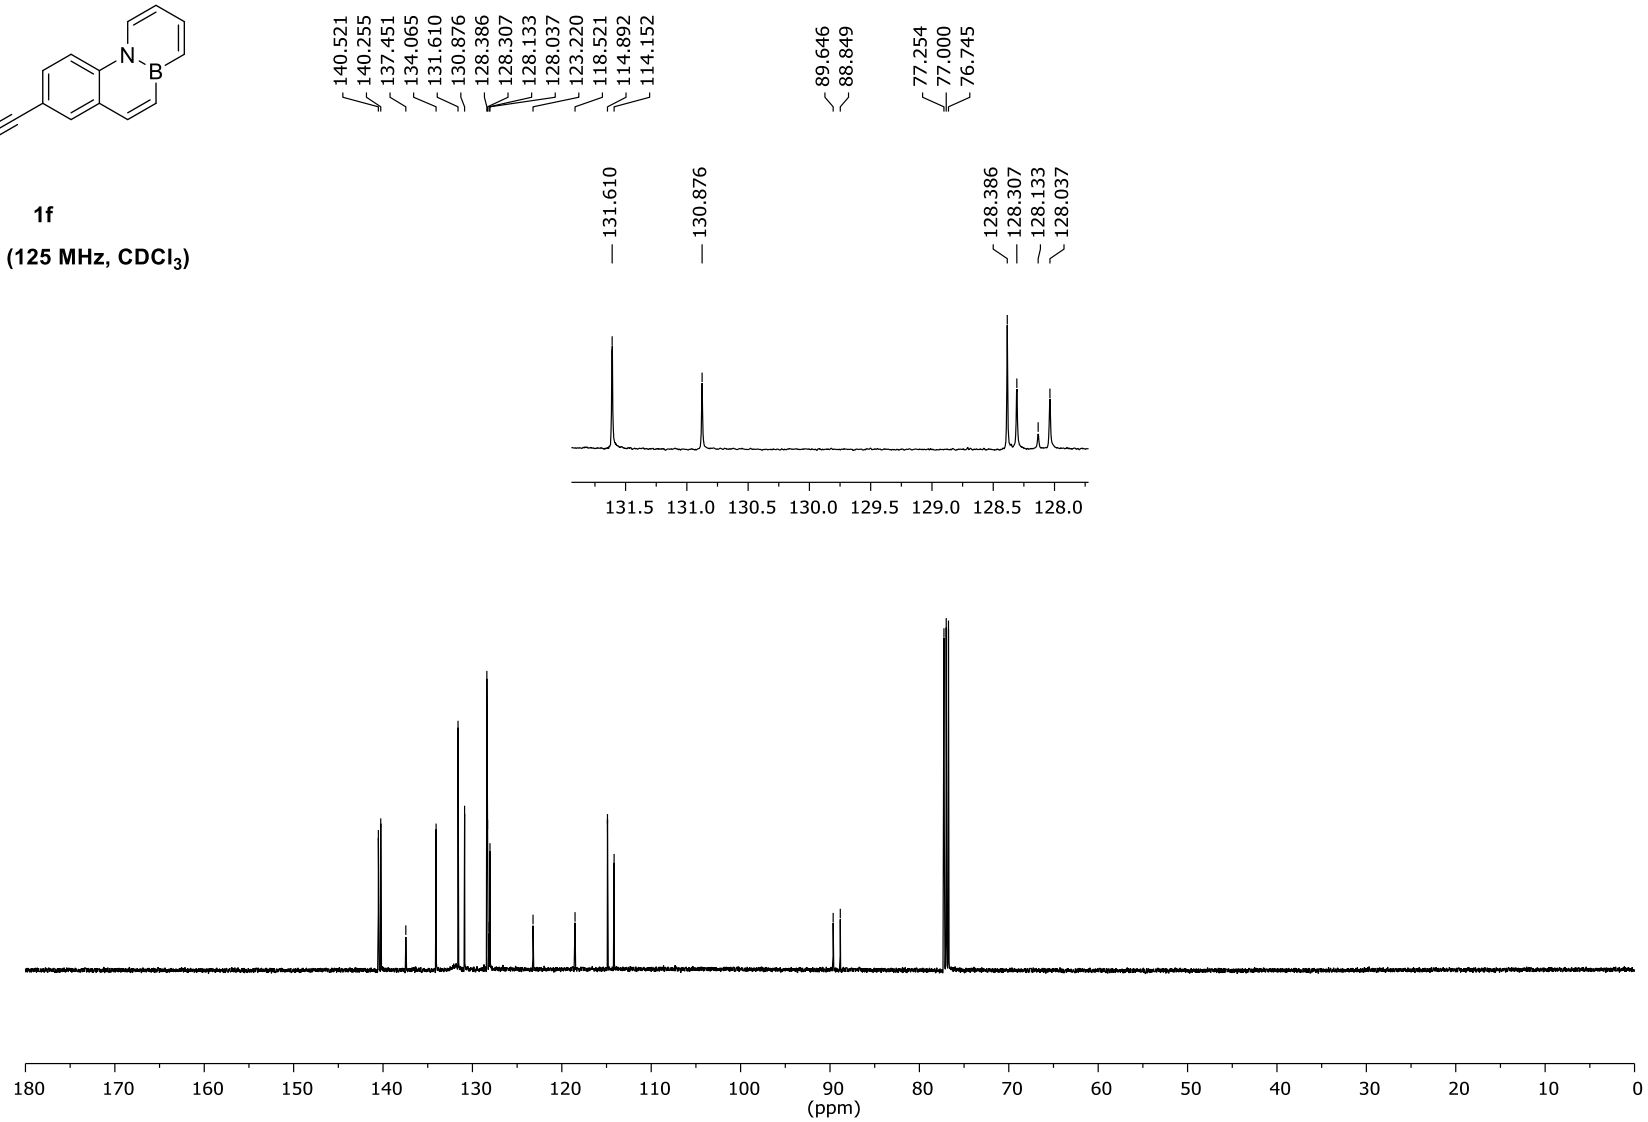

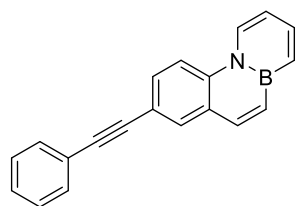

**1f**

<sup>11</sup>B-NMR (160 MHz, CDCl<sub>3</sub>)

— 29.170

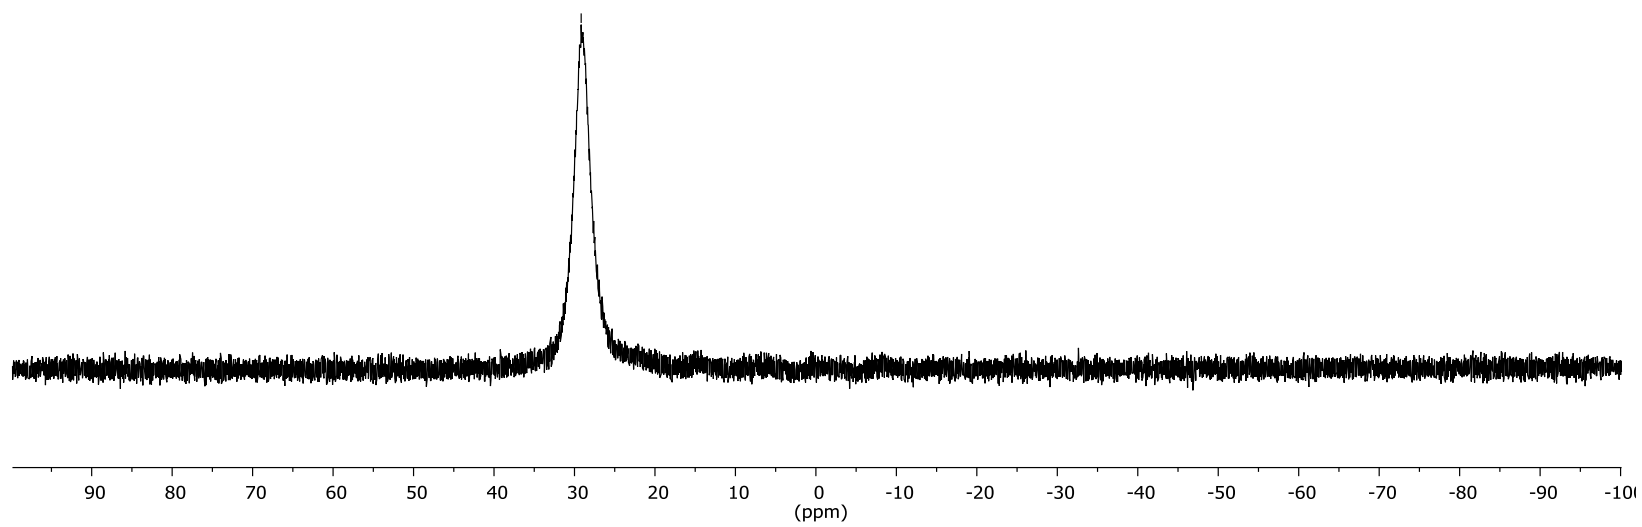

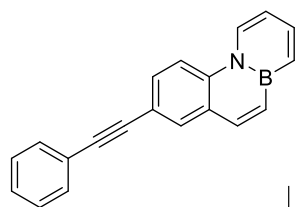

1f

gCOSY-NMR (CDCl<sub>3</sub>)

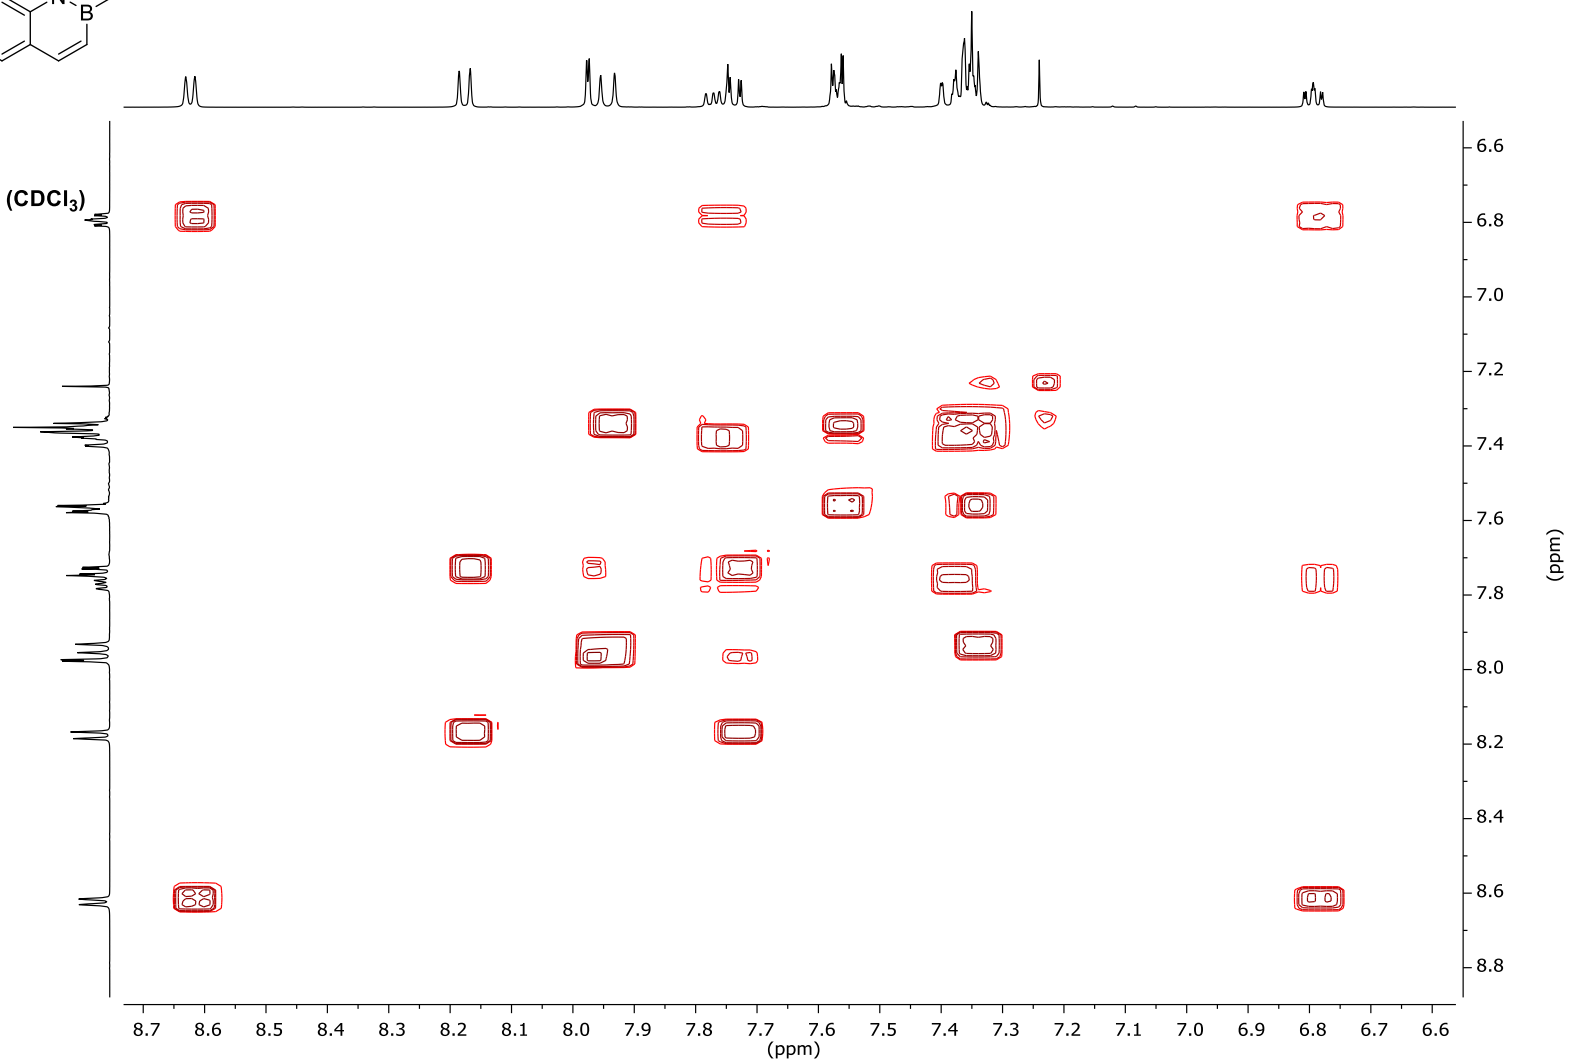

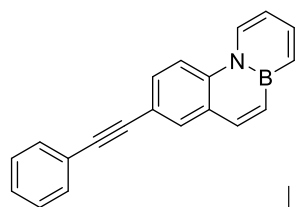

1f

TOCSY-NMR (CDCl<sub>3</sub>)

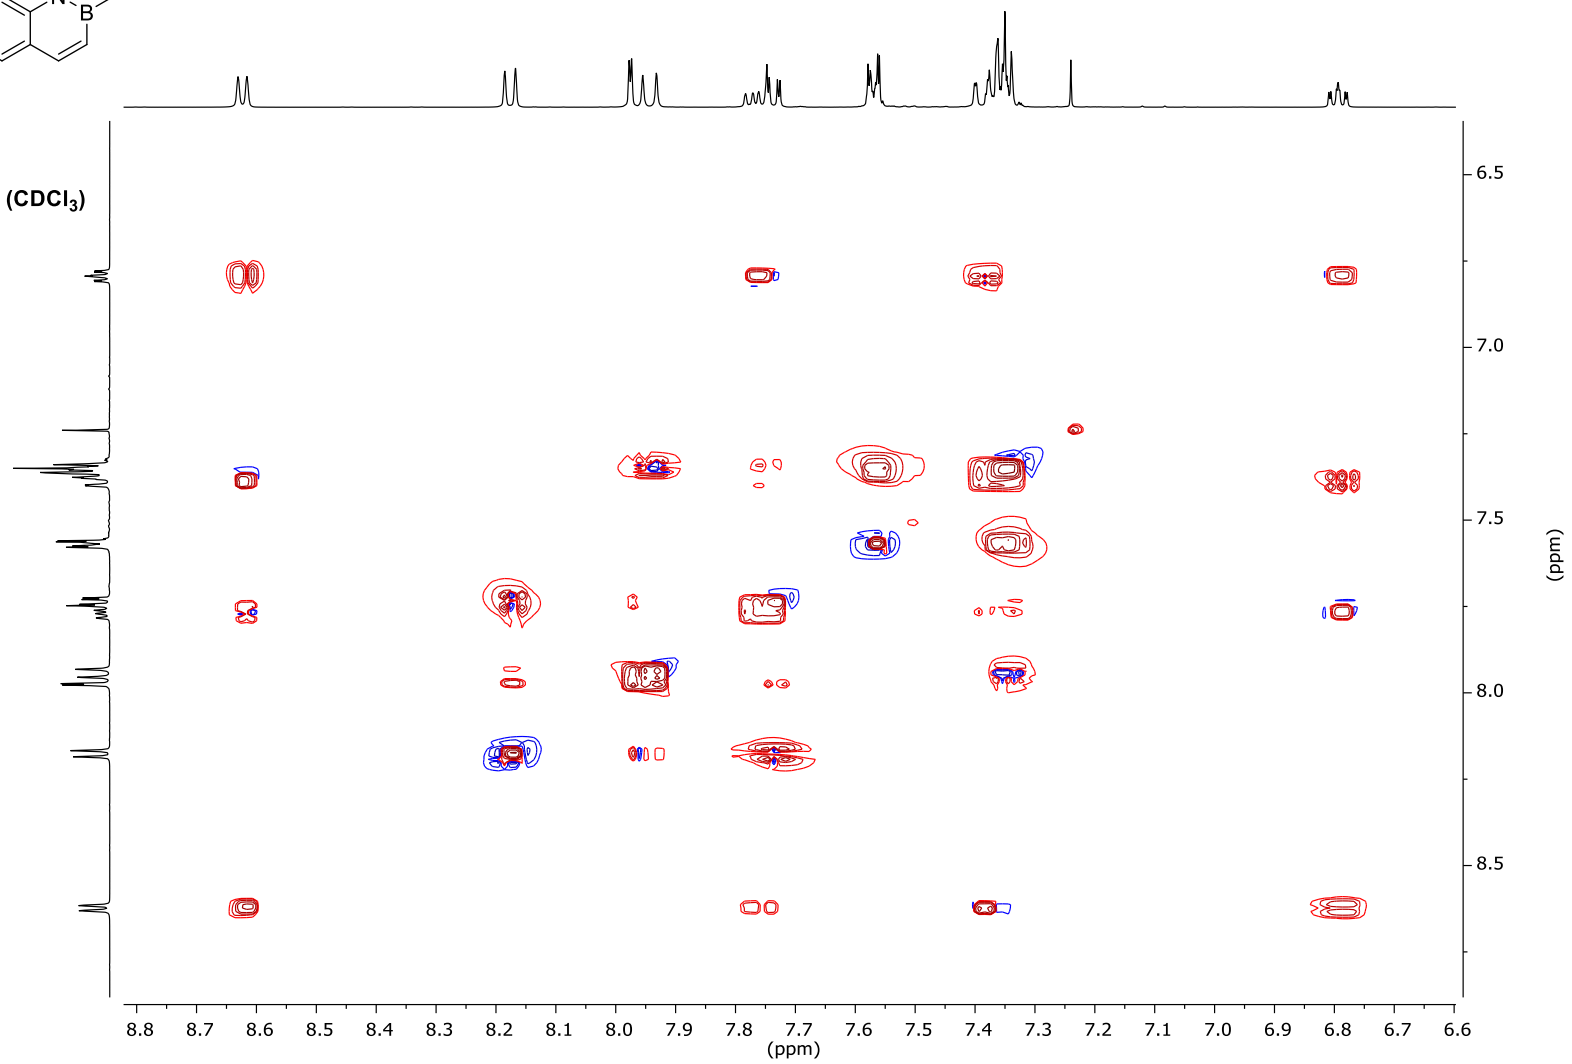

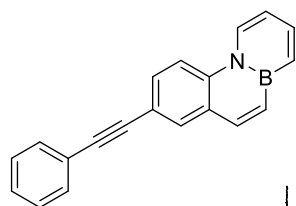

**1f**

gHSQC-NMR (CDCl<sub>3</sub>)

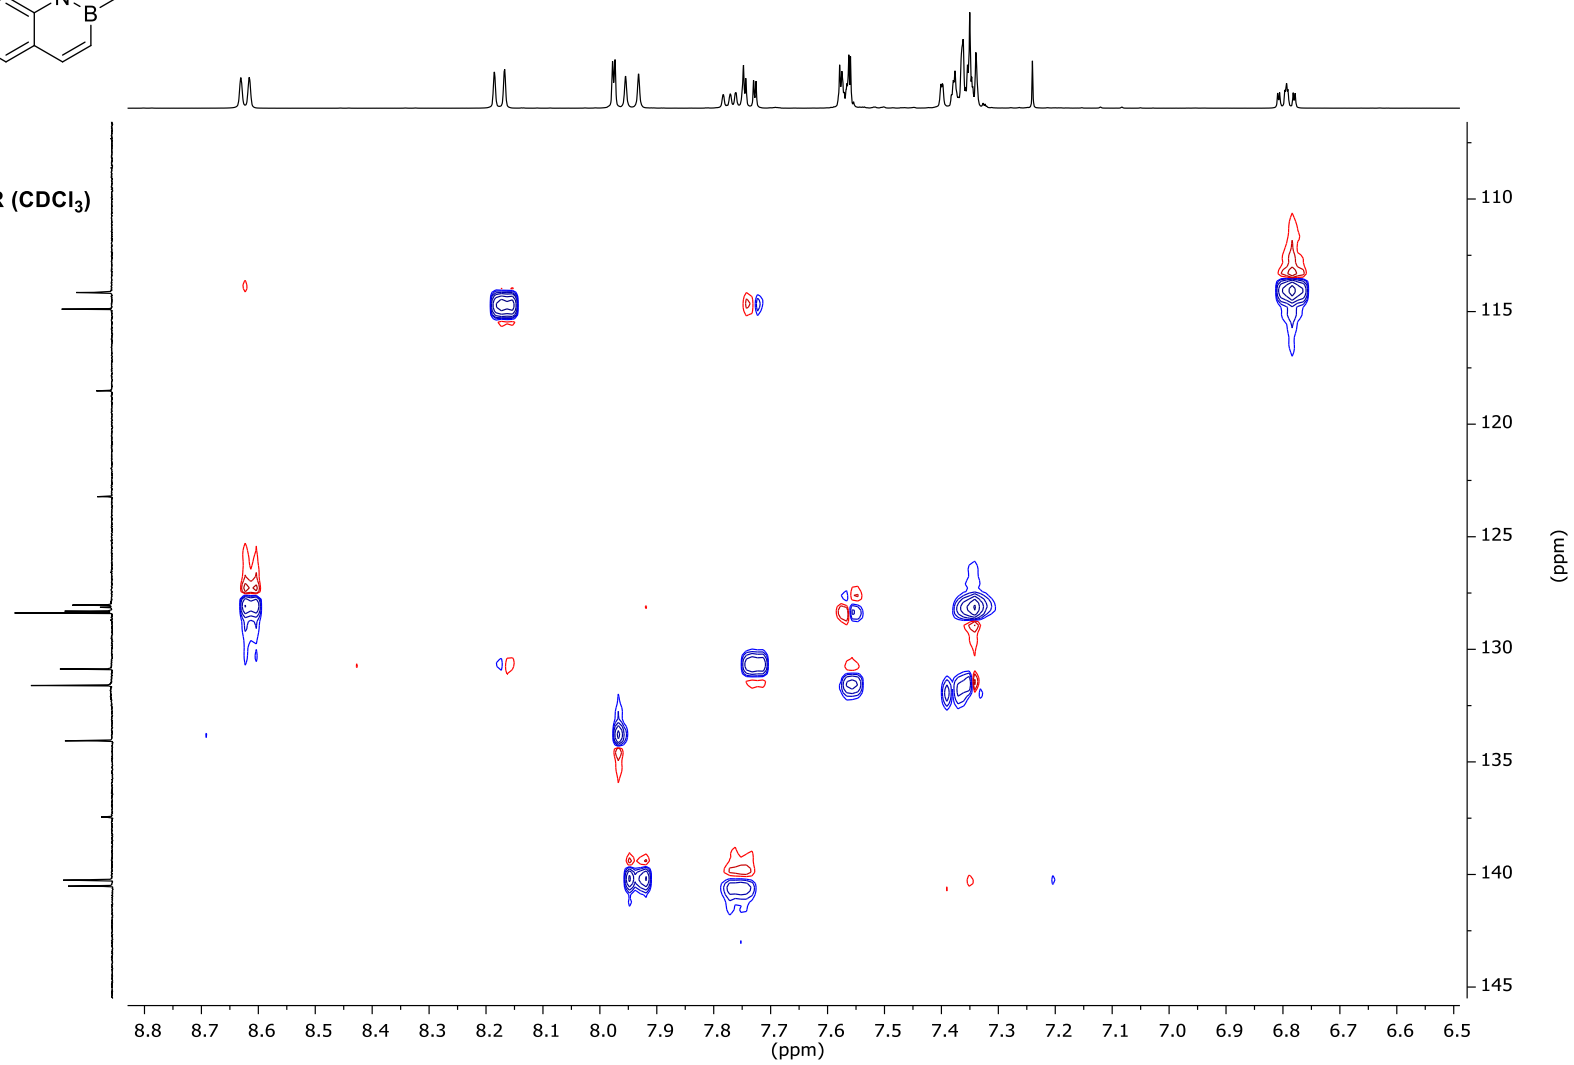

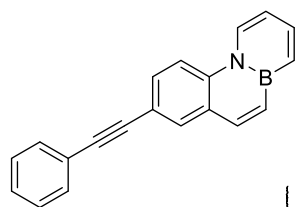

**1f**

gHMBC-NMR (CDCl<sub>3</sub>)

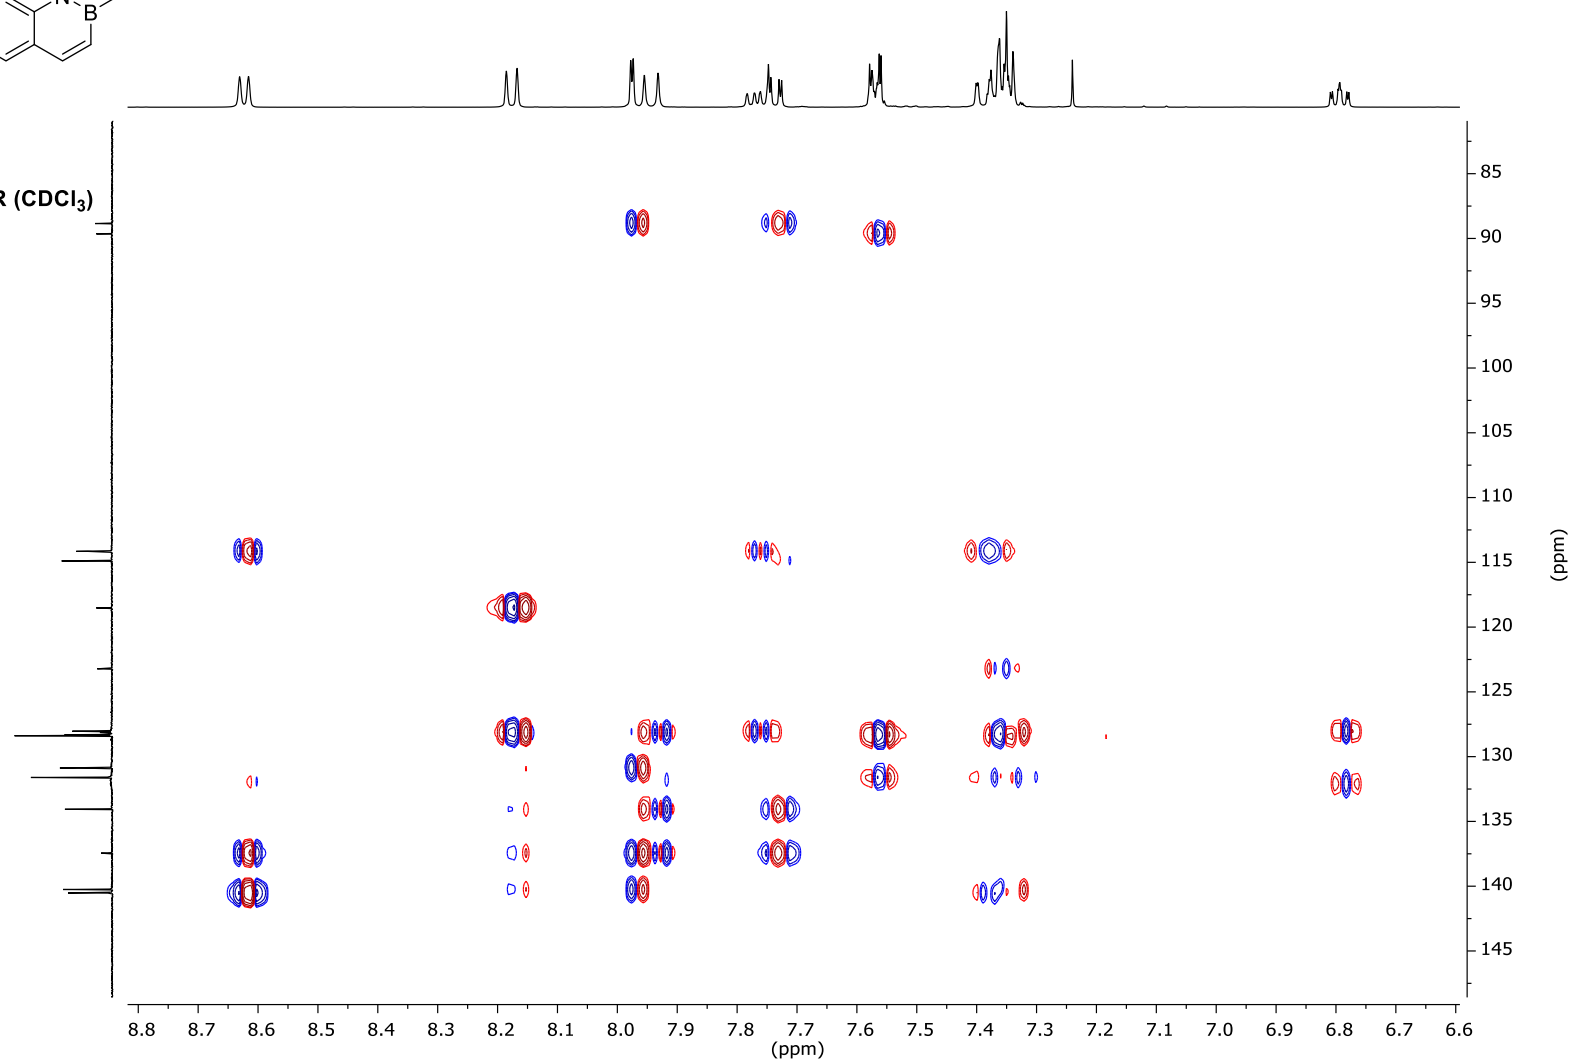

Supplement: Additional file 1 [file 1860-5397-15-122-S1.pdf]
